# Supplementary material for: Indirect design of OCM catalysts through machine learning of catalyst surface oxygen species
Source: Royal Society of Chemistry journal article supplement (doi:10.1039/d3cy00587a), 2023-01-01
Supplement: d3cy00587a2.csv [file d3cy00587a2.csv]

M1	M1mol	M2	M2mol	M3	M3mol	Support	Supportmol	en_ghoshAve	sound_velocityAve
Al	0.02	Ba	0.035602178578364	Bi	0.017602659311489	Al	0.92461527303085	0.150954659410458	4917.44165929302
Al	0.02	Ba	0.035602178578364	Bi	0.017602659311489	Ba	0.92461527303085	0.158924278413117	1692.75104128335
Al	0.02	Ba	0.035602178578364	Bi	0.017602659311489	Bi	0.92461527303085	0.180884050867669	1850.2790312436
Al	0.02	Ba	0.035602178578364	Bi	0.017602659311489	Ca	0.92461527303085	0.118831829688336	3722.0822060653
Al	0.02	Ba	0.035602178578364	Bi	0.017602659311489	Ce	0.92461527303085	0.167200428351534	2137.53595411227
Al	0.02	Ba	0.035602178578364	Bi	0.017602659311489	Co	0.92461527303085	0.144614899122746	4565.32026997013
Al	0.02	Ba	0.035602178578364	Bi	0.017602659311489	Cs	0.92461527303085	0.154785832789815	2209.14444308157
Al	0.02	Ba	0.035602178578364	Bi	0.017602659311489	Cu	0.92461527303085	0.15196802770352	3499.68974965084
Al	0.02	Ba	0.035602178578364	Bi	0.017602659311489	Eu	0.92461527303085	0.187887559974254	2846.5515111647
Al	0.02	Ba	0.035602178578364	Bi	0.017602659311489	Fe	0.92461527303085	0.140924018317978	4741.38096463158
Al	0.02	Ba	0.035602178578364	Bi	0.017602659311489	Hf	0.92461527303085	0.225001154408887	2980.7740180171
Al	0.02	Ba	0.035602178578364	Bi	0.017602659311489	In	0.92461527303085	0.164068401257031	1317.46377108395
Al	0.02	Ba	0.035602178578364	Bi	0.017602659311489	K	0.92461527303085	0.102873039679558	2044.87243060625
Al	0.02	Ba	0.035602178578364	Bi	0.017602659311489	La	0.92461527303085	0.163060222121285	2485.02416725987
Al	0.02	Ba	0.035602178578364	Bi	0.017602659311489	Li	0.92461527303085	0.109269973361273	5751.41337084725
Al	0.02	Ba	0.035602178578364	Bi	0.017602659311489	Mg	0.92461527303085	0.124606713136755	4455.97731223302
Al	0.02	Ba	0.035602178578364	Bi	0.017602659311489	Mn	0.92461527303085	0.137246388397071	4963.77342104604
Al	0.02	Ba	0.035602178578364	Bi	0.017602659311489	Mo	0.92461527303085	0.133523909330787	5927.4740655087
Al	0.02	Ba	0.035602178578364	Bi	0.017602659311489	Na	0.92461527303085	0.098262473403992	3156.83471267855
Al	0.02	Ba	0.035602178578364	Bi	0.017602659311489	Nd	0.92461527303085	0.175474354365387	2350.66205817613
Al	0.02	Ba	0.035602178578364	Bi	0.017602659311489	Ni	0.92461527303085	0.148294104323553	4796.97907873519
Al	0.02	Ba	0.035602178578364	Bi	0.017602659311489	Rb	0.92461527303085	0.108892832820603	1396.22776606407
Al	0.02	Ba	0.035602178578364	Bi	0.017602659311489	Pd	0.92461527303085	0.145348145584249	3036.37213212072
Al	0.02	Ba	0.035602178578364	Bi	0.017602659311489	Si	0.92461527303085	0.177294265967046	2230.1994776183
Al	0.02	Ba	0.035602178578364	Bi	0.017602659311489	Sm	0.92461527303085	0.18374828037924	2165.33501116408
Al	0.02	Ba	0.035602178578364	Bi	0.017602659311489	Sr	0.92461527303085	0.121700970366653	4365.38208675668
Al	0.02	Ba	0.035602178578364	Bi	0.017602659311489	Ti	0.92461527303085	0.126200247750488	4027.87183363518
Al	0.02	Ba	0.035602178578364	Bi	0.017602659311489	V	0.92461527303085	0.129879638278342	4417.05863236049
Al	0.02	Ba	0.035602178578364	Bi	0.017602659311489	W	0.92461527303085	0.233399620198333	4986.01266668748
Al	0.02	Ba	0.035602178578364	Bi	0.017602659311489	Y	0.92461527303085	0.124657307420589	3249.49823618457
Al	0.02	Ba	0.035602178578364	Bi	0.017602659311489	Yb	0.92461527303085	0.216849544246062	1664.95198423155
Al	0.02	Ba	0.035602178578364	Bi	0.017602659311489	Zn	0.92461527303085	0.155656221266107	3620.15233020867
Al	0.02	Ba	0.035602178578364	Bi	0.017602659311489	Zr	0.92461527303085	0.127613366483955	3712.8158537147
Al	0.02	Ba	0.035602178578364	Ca	0.017602659311489	Al	0.92461527303085	0.14977332038135	4953.07671156352
Al	0.02	Ba	0.035602178578364	Ca	0.017602659311489	Ba	0.92461527303085	0.157742939384009	1728.38609355385
Al	0.02	Ba	0.035602178578364	Ca	0.017602659311489	Bi	0.92461527303085	0.179702711838561	1885.91408351409
Al	0.02	Ba	0.035602178578364	Ca	0.017602659311489	Ca	0.92461527303085	0.117650490659228	3757.71725833579
Al	0.02	Ba	0.035602178578364	Ca	0.017602659311489	Ce	0.92461527303085	0.166019089322426	2173.17100638277
Al	0.02	Ba	0.035602178578364	Ca	0.017602659311489	Co	0.92461527303085	0.143433560093638	4600.95532224062
Al	0.02	Ba	0.035602178578364	Ca	0.017602659311489	Cs	0.92461527303085	0.153604493760706	2244.77949535206
Al	0.02	Ba	0.035602178578364	Ca	0.017602659311489	Cu	0.92461527303085	0.150786688674412	3535.32480192133
Al	0.02	Ba	0.035602178578364	Ca	0.017602659311489	Eu	0.92461527303085	0.186706220945146	2882.1865634352
Al	0.02	Ba	0.035602178578364	Ca	0.017602659311489	Fe	0.92461527303085	0.13974267928887	4777.01601690207
Al	0.02	Ba	0.035602178578364	Ca	0.017602659311489	Hf	0.92461527303085	0.223819815379779	3016.40907028759
Al	0.02	Ba	0.035602178578364	Ca	0.017602659311489	In	0.92461527303085	0.162887062227922	1353.09882335445
Al	0.02	Ba	0.035602178578364	Ca	0.017602659311489	K	0.92461527303085	0.101691700650449	2080.50748287674
Al	0.02	Ba	0.035602178578364	Ca	0.017602659311489	La	0.92461527303085	0.161878883092177	2520.65921953036
Al	0.02	Ba	0.035602178578364	Ca	0.017602659311489	Li	0.92461527303085	0.108088634332164	5787.04842311774
Al	0.02	Ba	0.035602178578364	Ca	0.017602659311489	Mg	0.92461527303085	0.123425374107647	4491.61236450351
Al	0.02	Ba	0.035602178578364	Ca	0.017602659311489	Mn	0.92461527303085	0.136065049367962	4999.40847331653
Al	0.02	Ba	0.035602178578364	Ca	0.017602659311489	Mo	0.92461527303085	0.132342570301678	5963.10911777919
Al	0.02	Ba	0.035602178578364	Ca	0.017602659311489	Na	0.92461527303085	0.097081134374884	3192.46976494904
Al	0.02	Ba	0.035602178578364	Ca	0.017602659311489	Nd	0.92461527303085	0.174293015336279	2386.29711044662
Al	0.02	Ba	0.035602178578364	Ca	0.017602659311489	Ni	0.92461527303085	0.147112765294445	4832.61413100568
Al	0.02	Ba	0.035602178578364	Ca	0.017602659311489	Rb	0.92461527303085	0.107711493791495	1431.86281833457
Al	0.02	Ba	0.035602178578364	Ca	0.017602659311489	Pd	0.92461527303085	0.144166806555141	3072.00718439121
Al	0.02	Ba	0.035602178578364	Ca	0.017602659311489	Si	0.92461527303085	0.176112926937937	2265.83452988879
Al	0.02	Ba	0.035602178578364	Ca	0.017602659311489	Sm	0.92461527303085	0.182566941350132	2200.97006343457
Al	0.02	Ba	0.035602178578364	Ca	0.017602659311489	Sr	0.92461527303085	0.120519631337545	4401.01713902717
Al	0.02	Ba	0.035602178578364	Ca	0.017602659311489	Ti	0.92461527303085	0.12501890872138	4063.50688590568
Al	0.02	Ba	0.035602178578364	Ca	0.017602659311489	V	0.92461527303085	0.128698299249233	4452.69368463098
Al	0.02	Ba	0.035602178578364	Ca	0.017602659311489	W	0.92461527303085	0.232218281169224	5021.64771895797
Al	0.02	Ba	0.035602178578364	Ca	0.017602659311489	Y	0.92461527303085	0.123475968391481	3285.13328845507
Al	0.02	Ba	0.035602178578364	Ca	0.017602659311489	Yb	0.92461527303085	0.215668205216954	1700.58703650204
Al	0.02	Ba	0.035602178578364	Ca	0.017602659311489	Zn	0.92461527303085	0.154474882236998	3655.78738247917
Al	0.02	Ba	0.035602178578364	Ca	0.017602659311489	Zr	0.92461527303085	0.126432027454847	3748.45090598519
Al	0.02	Ba	0.035602178578364	Ce	0.017602659311489	Al	0.92461527303085	0.150694153065469	4922.9104049385
Al	0.02	Ba	0.035602178578364	Ce	0.017602659311489	Ba	0.92461527303085	0.158663772068128	1698.21978692883
Al	0.02	Ba	0.035602178578364	Ce	0.017602659311489	Bi	0.92461527303085	0.18062354452268	1855.74777688907
Al	0.02	Ba	0.035602178578364	Ce	0.017602659311489	Ca	0.92461527303085	0.118571323343347	3727.55095171077
Al	0.02	Ba	0.035602178578364	Ce	0.017602659311489	Ce	0.92461527303085	0.166939922006545	2143.00469975775
Al	0.02	Ba	0.035602178578364	Ce	0.017602659311489	Co	0.92461527303085	0.144354392777757	4570.7890156156
Al	0.02	Ba	0.035602178578364	Ce	0.017602659311489	Cs	0.92461527303085	0.154525326444825	2214.61318872704
Al	0.02	Ba	0.035602178578364	Ce	0.017602659311489	Cu	0.92461527303085	0.151707521358531	3505.15849529631
Al	0.02	Ba	0.035602178578364	Ce	0.017602659311489	Eu	0.92461527303085	0.187627053629265	2852.02025681017
Al	0.02	Ba	0.035602178578364	Ce	0.017602659311489	Fe	0.92461527303085	0.140663511972989	4746.84971027705
Al	0.02	Ba	0.035602178578364	Ce	0.017602659311489	Hf	0.92461527303085	0.224740648063898	2986.24276366257
Al	0.02	Ba	0.035602178578364	Ce	0.017602659311489	In	0.92461527303085	0.163807894912041	1322.93251672942
Al	0.02	Ba	0.035602178578364	Ce	0.017602659311489	K	0.92461527303085	0.102612533334568	2050.34117625172
Al	0.02	Ba	0.035602178578364	Ce	0.017602659311489	La	0.92461527303085	0.162799715776296	2490.49291290534
Al	0.02	Ba	0.035602178578364	Ce	0.017602659311489	Li	0.92461527303085	0.109009467016283	5756.88211649272
Al	0.02	Ba	0.035602178578364	Ce	0.017602659311489	Mg	0.92461527303085	0.124346206791766	4461.44605787849
Al	0.02	Ba	0.035602178578364	Ce	0.017602659311489	Mn	0.92461527303085	0.136985882052081	4969.24216669151
Al	0.02	Ba	0.035602178578364	Ce	0.017602659311489	Mo	0.92461527303085	0.133263402985797	5932.94281115417
Al	0.02	Ba	0.035602178578364	Ce	0.017602659311489	Na	0.92461527303085	0.098001967059003	3162.30345832402
Al	0.02	Ba	0.035602178578364	Ce	0.017602659311489	Nd	0.92461527303085	0.175213848020398	2356.1308038216
Al	0.02	Ba	0.035602178578364	Ce	0.017602659311489	Ni	0.92461527303085	0.148033597978564	4802.44782438066
Al	0.02	Ba	0.035602178578364	Ce	0.017602659311489	Rb	0.92461527303085	0.108632326475614	1401.69651170955
Al	0.02	Ba	0.035602178578364	Ce	0.017602659311489	Pd	0.92461527303085	0.14508763923926	3041.84087776619
Al	0.02	Ba	0.035602178578364	Ce	0.017602659311489	Si	0.92461527303085	0.177033759622056	2235.66822326377
Al	0.02	Ba	0.035602178578364	Ce	0.017602659311489	Sm	0.92461527303085	0.183487774034251	2170.80375680955
Al	0.02	Ba	0.035602178578364	Ce	0.017602659311489	Sr	0.92461527303085	0.121440464021664	4370.85083240215
Al	0.02	Ba	0.035602178578364	Ce	0.017602659311489	Ti	0.92461527303085	0.125939741405499	4033.34057928066
Al	0.02	Ba	0.035602178578364	Ce	0.017602659311489	V	0.92461527303085	0.129619131933352	4422.52737800596
Al	0.02	Ba	0.035602178578364	Ce	0.017602659311489	W	0.92461527303085	0.233139113853343	4991.48141233295
Al	0.02	Ba	0.035602178578364	Ce	0.017602659311489	Y	0.92461527303085	0.1243968010756	3254.96698183005
Al	0.02	Ba	0.035602178578364	Ce	0.017602659311489	Yb	0.92461527303085	0.216589037901073	1670.42072987702
Al	0.02	Ba	0.035602178578364	Ce	0.017602659311489	Zn	0.92461527303085	0.155395714921117	3625.62107585414
Al	0.02	Ba	0.035602178578364	Ce	0.017602659311489	Zr	0.92461527303085	0.127352860138966	3718.28459936017
Al	0.02	Ba	0.035602178578364	Co	0.017602659311489	Al	0.92461527303085	0.150264173821149	4969.13012620022
Al	0.02	Ba	0.035602178578364	Co	0.017602659311489	Ba	0.92461527303085	0.158233792823808	1744.43950819055
Al	0.02	Ba	0.035602178578364	Co	0.017602659311489	Bi	0.92461527303085	0.18019356527836	1901.9674981508
Al	0.02	Ba	0.035602178578364	Co	0.017602659311489	Ca	0.92461527303085	0.118141344099027	3773.7706729725
Al	0.02	Ba	0.035602178578364	Co	0.017602659311489	Ce	0.92461527303085	0.166509942762226	2189.22442101947
Al	0.02	Ba	0.035602178578364	Co	0.017602659311489	Co	0.92461527303085	0.143924413533438	4617.00873687733
Al	0.02	Ba	0.035602178578364	Co	0.017602659311489	Cs	0.92461527303085	0.154095347200506	2260.83290998877
Al	0.02	Ba	0.035602178578364	Co	0.017602659311489	Cu	0.92461527303085	0.151277542114211	3551.37821655804
Al	0.02	Ba	0.035602178578364	Co	0.017602659311489	Eu	0.92461527303085	0.187197074384946	2898.2399780719
Al	0.02	Ba	0.035602178578364	Co	0.017602659311489	Fe	0.92461527303085	0.140233532728669	4793.06943153877
Al	0.02	Ba	0.035602178578364	Co	0.017602659311489	Hf	0.92461527303085	0.224310668819579	3032.4624849243
Al	0.02	Ba	0.035602178578364	Co	0.017602659311489	In	0.92461527303085	0.163377915667722	1369.15223799115
Al	0.02	Ba	0.035602178578364	Co	0.017602659311489	K	0.92461527303085	0.102182554090249	2096.56089751345
Al	0.02	Ba	0.035602178578364	Co	0.017602659311489	La	0.92461527303085	0.162369736531976	2536.71263416707
Al	0.02	Ba	0.035602178578364	Co	0.017602659311489	Li	0.92461527303085	0.108579487771964	5803.10183775445
Al	0.02	Ba	0.035602178578364	Co	0.017602659311489	Mg	0.92461527303085	0.123916227547446	4507.66577914022
Al	0.02	Ba	0.035602178578364	Co	0.017602659311489	Mn	0.92461527303085	0.136555902807762	5015.46188795323
Al	0.02	Ba	0.035602178578364	Co	0.017602659311489	Mo	0.92461527303085	0.132833423741478	5979.16253241589
Al	0.02	Ba	0.035602178578364	Co	0.017602659311489	Na	0.92461527303085	0.097571987814683	3208.52317958575
Al	0.02	Ba	0.035602178578364	Co	0.017602659311489	Nd	0.92461527303085	0.174783868776079	2402.35052508333
Al	0.02	Ba	0.035602178578364	Co	0.017602659311489	Ni	0.92461527303085	0.147603618734244	4848.66754564239
Al	0.02	Ba	0.035602178578364	Co	0.017602659311489	Rb	0.92461527303085	0.108202347231294	1447.91623297127
Al	0.02	Ba	0.035602178578364	Co	0.017602659311489	Pd	0.92461527303085	0.144657659994941	3088.06059902792
Al	0.02	Ba	0.035602178578364	Co	0.017602659311489	Si	0.92461527303085	0.176603780377737	2281.8879445255
Al	0.02	Ba	0.035602178578364	Co	0.017602659311489	Sm	0.92461527303085	0.183057794789931	2217.02347807128
Al	0.02	Ba	0.035602178578364	Co	0.017602659311489	Sr	0.92461527303085	0.121010484777344	4417.07055366388
Al	0.02	Ba	0.035602178578364	Co	0.017602659311489	Ti	0.92461527303085	0.125509762161179	4079.56030054238
Al	0.02	Ba	0.035602178578364	Co	0.017602659311489	V	0.92461527303085	0.129189152689033	4468.74709926769
Al	0.02	Ba	0.035602178578364	Co	0.017602659311489	W	0.92461527303085	0.232709134609024	5037.70113359468
Al	0.02	Ba	0.035602178578364	Co	0.017602659311489	Y	0.92461527303085	0.12396682183128	3301.18670309177
Al	0.02	Ba	0.035602178578364	Co	0.017602659311489	Yb	0.92461527303085	0.216159058656754	1716.64045113875
Al	0.02	Ba	0.035602178578364	Co	0.017602659311489	Zn	0.92461527303085	0.154965735676798	3671.84079711587
Al	0.02	Ba	0.035602178578364	Co	0.017602659311489	Zr	0.92461527303085	0.126922880894646	3764.5043206219
Al	0.02	Ba	0.035602178578364	Cs	0.017602659311489	Al	0.92461527303085	0.150457806227452	4924.27367447546
Al	0.02	Ba	0.035602178578364	Cs	0.017602659311489	Ba	0.92461527303085	0.158427425230111	1699.58305646579
Al	0.02	Ba	0.035602178578364	Cs	0.017602659311489	Bi	0.92461527303085	0.180387197684663	1857.11104642603
Al	0.02	Ba	0.035602178578364	Cs	0.017602659311489	Ca	0.92461527303085	0.11833497650533	3728.91422124774
Al	0.02	Ba	0.035602178578364	Cs	0.017602659311489	Ce	0.92461527303085	0.166703575168528	2144.36796929471
Al	0.02	Ba	0.035602178578364	Cs	0.017602659311489	Co	0.92461527303085	0.14411804593974	4572.15228515257
Al	0.02	Ba	0.035602178578364	Cs	0.017602659311489	Cs	0.92461527303085	0.154288979606809	2215.97645826401
Al	0.02	Ba	0.035602178578364	Cs	0.017602659311489	Cu	0.92461527303085	0.151471174520514	3506.52176483328
Al	0.02	Ba	0.035602178578364	Cs	0.017602659311489	Eu	0.92461527303085	0.187390706791248	2853.38352634714
Al	0.02	Ba	0.035602178578364	Cs	0.017602659311489	Fe	0.92461527303085	0.140427165134972	4748.21297981401
Al	0.02	Ba	0.035602178578364	Cs	0.017602659311489	Hf	0.92461527303085	0.224504301225881	2987.60603319954
Al	0.02	Ba	0.035602178578364	Cs	0.017602659311489	In	0.92461527303085	0.163571548074025	1324.29578626639
Al	0.02	Ba	0.035602178578364	Cs	0.017602659311489	K	0.92461527303085	0.102376186496552	2051.70444578869
Al	0.02	Ba	0.035602178578364	Cs	0.017602659311489	La	0.92461527303085	0.162563368938279	2491.85618244231
Al	0.02	Ba	0.035602178578364	Cs	0.017602659311489	Li	0.92461527303085	0.108773120178267	5758.24538602969
Al	0.02	Ba	0.035602178578364	Cs	0.017602659311489	Mg	0.92461527303085	0.124109859953749	4462.80932741546
Al	0.02	Ba	0.035602178578364	Cs	0.017602659311489	Mn	0.92461527303085	0.136749535214065	4970.60543622847
Al	0.02	Ba	0.035602178578364	Cs	0.017602659311489	Mo	0.92461527303085	0.133027056147781	5934.30608069113
Al	0.02	Ba	0.035602178578364	Cs	0.017602659311489	Na	0.92461527303085	0.097765620220986	3163.66672786099
Al	0.02	Ba	0.035602178578364	Cs	0.017602659311489	Nd	0.92461527303085	0.174977501182381	2357.49407335857
Al	0.02	Ba	0.035602178578364	Cs	0.017602659311489	Ni	0.92461527303085	0.147797251140547	4803.81109391763
Al	0.02	Ba	0.035602178578364	Cs	0.017602659311489	Rb	0.92461527303085	0.108395979637597	1403.05978124651
Al	0.02	Ba	0.035602178578364	Cs	0.017602659311489	Pd	0.92461527303085	0.144851292401243	3043.20414730315
Al	0.02	Ba	0.035602178578364	Cs	0.017602659311489	Si	0.92461527303085	0.17679741278404	2237.03149280074
Al	0.02	Ba	0.035602178578364	Cs	0.017602659311489	Sm	0.92461527303085	0.183251427196234	2172.16702634652
Al	0.02	Ba	0.035602178578364	Cs	0.017602659311489	Sr	0.92461527303085	0.121204117183647	4372.21410193912
Al	0.02	Ba	0.035602178578364	Cs	0.017602659311489	Ti	0.92461527303085	0.125703394567482	4034.70384881762
Al	0.02	Ba	0.035602178578364	Cs	0.017602659311489	V	0.92461527303085	0.129382785095336	4423.89064754293
Al	0.02	Ba	0.035602178578364	Cs	0.017602659311489	W	0.92461527303085	0.232902767015326	4992.84468186992
Al	0.02	Ba	0.035602178578364	Cs	0.017602659311489	Y	0.92461527303085	0.124160454237583	3256.33025136701
Al	0.02	Ba	0.035602178578364	Cs	0.017602659311489	Yb	0.92461527303085	0.216352691063056	1671.78399941399
Al	0.02	Ba	0.035602178578364	Cs	0.017602659311489	Zn	0.92461527303085	0.155159368083101	3626.98434539111
Al	0.02	Ba	0.035602178578364	Cs	0.017602659311489	Zr	0.92461527303085	0.127116513300949	3719.64786889714
Al	0.02	Ba	0.035602178578364	Cu	0.017602659311489	Al	0.92461527303085	0.150404161360893	4948.84284396702
Al	0.02	Ba	0.035602178578364	Cu	0.017602659311489	Ba	0.92461527303085	0.158373780363552	1724.15222595735
Al	0.02	Ba	0.035602178578364	Cu	0.017602659311489	Bi	0.92461527303085	0.180333552818104	1881.68021591759
Al	0.02	Ba	0.035602178578364	Cu	0.017602659311489	Ca	0.92461527303085	0.118281331638771	3753.4833907393
Al	0.02	Ba	0.035602178578364	Cu	0.017602659311489	Ce	0.92461527303085	0.166649930301969	2168.93713878627
Al	0.02	Ba	0.035602178578364	Cu	0.017602659311489	Co	0.92461527303085	0.144064401073181	4596.72145464413
Al	0.02	Ba	0.035602178578364	Cu	0.017602659311489	Cs	0.92461527303085	0.154235334740249	2240.54562775557
Al	0.02	Ba	0.035602178578364	Cu	0.017602659311489	Cu	0.92461527303085	0.151417529653955	3531.09093432484
Al	0.02	Ba	0.035602178578364	Cu	0.017602659311489	Eu	0.92461527303085	0.187337061924689	2877.9526958387
Al	0.02	Ba	0.035602178578364	Cu	0.017602659311489	Fe	0.92461527303085	0.140373520268413	4772.78214930557
Al	0.02	Ba	0.035602178578364	Cu	0.017602659311489	Hf	0.92461527303085	0.224450656359322	3012.1752026911
Al	0.02	Ba	0.035602178578364	Cu	0.017602659311489	In	0.92461527303085	0.163517903207465	1348.86495575795
Al	0.02	Ba	0.035602178578364	Cu	0.017602659311489	K	0.92461527303085	0.102322541629993	2076.27361528025
Al	0.02	Ba	0.035602178578364	Cu	0.017602659311489	La	0.92461527303085	0.16250972407172	2516.42535193387
Al	0.02	Ba	0.035602178578364	Cu	0.017602659311489	Li	0.92461527303085	0.108719475311707	5782.81455552125
Al	0.02	Ba	0.035602178578364	Cu	0.017602659311489	Mg	0.92461527303085	0.12405621508719	4487.37849690702
Al	0.02	Ba	0.035602178578364	Cu	0.017602659311489	Mn	0.92461527303085	0.136695890347506	4995.17460572003
Al	0.02	Ba	0.035602178578364	Cu	0.017602659311489	Mo	0.92461527303085	0.132973411281221	5958.87525018269
Al	0.02	Ba	0.035602178578364	Cu	0.017602659311489	Na	0.92461527303085	0.097711975354427	3188.23589735255
Al	0.02	Ba	0.035602178578364	Cu	0.017602659311489	Nd	0.92461527303085	0.174923856315822	2382.06324285013
Al	0.02	Ba	0.035602178578364	Cu	0.017602659311489	Ni	0.92461527303085	0.147743606273988	4828.38026340919
Al	0.02	Ba	0.035602178578364	Cu	0.017602659311489	Rb	0.92461527303085	0.108342334771038	1427.62895073807
Al	0.02	Ba	0.035602178578364	Cu	0.017602659311489	Pd	0.92461527303085	0.144797647534684	3067.77331679471
Al	0.02	Ba	0.035602178578364	Cu	0.017602659311489	Si	0.92461527303085	0.17674376791748	2261.6006622923
Al	0.02	Ba	0.035602178578364	Cu	0.017602659311489	Sm	0.92461527303085	0.183197782329675	2196.73619583808
Al	0.02	Ba	0.035602178578364	Cu	0.017602659311489	Sr	0.92461527303085	0.121150472317088	4396.78327143068
Al	0.02	Ba	0.035602178578364	Cu	0.017602659311489	Ti	0.92461527303085	0.125649749700923	4059.27301830918
Al	0.02	Ba	0.035602178578364	Cu	0.017602659311489	V	0.92461527303085	0.129329140228777	4448.45981703449
Al	0.02	Ba	0.035602178578364	Cu	0.017602659311489	W	0.92461527303085	0.232849122148767	5017.41385136148
Al	0.02	Ba	0.035602178578364	Cu	0.017602659311489	Y	0.92461527303085	0.124106809371024	3280.89942085857
Al	0.02	Ba	0.035602178578364	Cu	0.017602659311489	Yb	0.92461527303085	0.216299046196497	1696.35316890555
Al	0.02	Ba	0.035602178578364	Cu	0.017602659311489	Zn	0.92461527303085	0.155105723216541	3651.55351488267
Al	0.02	Ba	0.035602178578364	Cu	0.017602659311489	Zr	0.92461527303085	0.12706286843439	3744.2170383887
Al	0.02	Ba	0.035602178578364	Eu	0.017602659311489	Al	0.92461527303085	0.151087990957518	4936.4085156245
Al	0.02	Ba	0.035602178578364	Eu	0.017602659311489	Ba	0.92461527303085	0.159057609960177	1711.71789761483
Al	0.02	Ba	0.035602178578364	Eu	0.017602659311489	Bi	0.92461527303085	0.181017382414729	1869.24588757507
Al	0.02	Ba	0.035602178578364	Eu	0.017602659311489	Ca	0.92461527303085	0.118965161235395	3741.04906239678
Al	0.02	Ba	0.035602178578364	Eu	0.017602659311489	Ce	0.92461527303085	0.167333759898594	2156.50281044375
Al	0.02	Ba	0.035602178578364	Eu	0.017602659311489	Co	0.92461527303085	0.144748230669806	4584.2871263016
Al	0.02	Ba	0.035602178578364	Eu	0.017602659311489	Cs	0.92461527303085	0.154919164336874	2228.11129941304
Al	0.02	Ba	0.035602178578364	Eu	0.017602659311489	Cu	0.92461527303085	0.152101359250579	3518.65660598232
Al	0.02	Ba	0.035602178578364	Eu	0.017602659311489	Eu	0.92461527303085	0.188020891521314	2865.51836749618
Al	0.02	Ba	0.035602178578364	Eu	0.017602659311489	Fe	0.92461527303085	0.141057349865037	4760.34782096305
Al	0.02	Ba	0.035602178578364	Eu	0.017602659311489	Hf	0.92461527303085	0.225134485955947	2999.74087434858
Al	0.02	Ba	0.035602178578364	Eu	0.017602659311489	In	0.92461527303085	0.16420173280409	1336.43062741543
Al	0.02	Ba	0.035602178578364	Eu	0.017602659311489	K	0.92461527303085	0.103006371226617	2063.83928693772
Al	0.02	Ba	0.035602178578364	Eu	0.017602659311489	La	0.92461527303085	0.163193553668345	2503.99102359134
Al	0.02	Ba	0.035602178578364	Eu	0.017602659311489	Li	0.92461527303085	0.109403304908332	5770.38022717872
Al	0.02	Ba	0.035602178578364	Eu	0.017602659311489	Mg	0.92461527303085	0.124740044683814	4474.94416856449
Al	0.02	Ba	0.035602178578364	Eu	0.017602659311489	Mn	0.92461527303085	0.13737971994413	4982.74027737751
Al	0.02	Ba	0.035602178578364	Eu	0.017602659311489	Mo	0.92461527303085	0.133657240877846	5946.44092184017
Al	0.02	Ba	0.035602178578364	Eu	0.017602659311489	Na	0.92461527303085	0.098395804951052	3175.80156901002
Al	0.02	Ba	0.035602178578364	Eu	0.017602659311489	Nd	0.92461527303085	0.175607685912447	2369.62891450761
Al	0.02	Ba	0.035602178578364	Eu	0.017602659311489	Ni	0.92461527303085	0.148427435870613	4815.94593506667
Al	0.02	Ba	0.035602178578364	Eu	0.017602659311489	Rb	0.92461527303085	0.109026164367663	1415.19462239555
Al	0.02	Ba	0.035602178578364	Eu	0.017602659311489	Pd	0.92461527303085	0.145481477131309	3055.33898845219
Al	0.02	Ba	0.035602178578364	Eu	0.017602659311489	Si	0.92461527303085	0.177427597514105	2249.16633394977
Al	0.02	Ba	0.035602178578364	Eu	0.017602659311489	Sm	0.92461527303085	0.1838816119263	2184.30186749556
Al	0.02	Ba	0.035602178578364	Eu	0.017602659311489	Sr	0.92461527303085	0.121834301913712	4384.34894308816
Al	0.02	Ba	0.035602178578364	Eu	0.017602659311489	Ti	0.92461527303085	0.126333579297548	4046.83868996666
Al	0.02	Ba	0.035602178578364	Eu	0.017602659311489	V	0.92461527303085	0.130012969825401	4436.02548869196
Al	0.02	Ba	0.035602178578364	Eu	0.017602659311489	W	0.92461527303085	0.233532951745392	5004.97952301896
Al	0.02	Ba	0.035602178578364	Eu	0.017602659311489	Y	0.92461527303085	0.124790638967649	3268.46509251605
Al	0.02	Ba	0.035602178578364	Eu	0.017602659311489	Yb	0.92461527303085	0.216982875793122	1683.91884056302
Al	0.02	Ba	0.035602178578364	Eu	0.017602659311489	Zn	0.92461527303085	0.155789552813166	3639.11918654015
Al	0.02	Ba	0.035602178578364	Eu	0.017602659311489	Zr	0.92461527303085	0.127746698031014	3731.78271004617
Al	0.02	Ba	0.035602178578364	Fe	0.017602659311489	Al	0.92461527303085	0.150193907496051	4972.48193804745
Al	0.02	Ba	0.035602178578364	Fe	0.017602659311489	Ba	0.92461527303085	0.15816352649871	1747.79132003778
Al	0.02	Ba	0.035602178578364	Fe	0.017602659311489	Bi	0.92461527303085	0.180123298953262	1905.31930999802
Al	0.02	Ba	0.035602178578364	Fe	0.017602659311489	Ca	0.92461527303085	0.118071077773929	3777.12248481972
Al	0.02	Ba	0.035602178578364	Fe	0.017602659311489	Ce	0.92461527303085	0.166439676437127	2192.5762328667
Al	0.02	Ba	0.035602178578364	Fe	0.017602659311489	Co	0.92461527303085	0.143854147208339	4620.36054872455
Al	0.02	Ba	0.035602178578364	Fe	0.017602659311489	Cs	0.92461527303085	0.154025080875408	2264.18472183599
Al	0.02	Ba	0.035602178578364	Fe	0.017602659311489	Cu	0.92461527303085	0.151207275789113	3554.73002840526
Al	0.02	Ba	0.035602178578364	Fe	0.017602659311489	Eu	0.92461527303085	0.187126808059847	2901.59178991913
Al	0.02	Ba	0.035602178578364	Fe	0.017602659311489	Fe	0.92461527303085	0.140163266403571	4796.421243386
Al	0.02	Ba	0.035602178578364	Fe	0.017602659311489	Hf	0.92461527303085	0.22424040249448	3035.81429677152
Al	0.02	Ba	0.035602178578364	Fe	0.017602659311489	In	0.92461527303085	0.163307649342624	1372.50404983838
Al	0.02	Ba	0.035602178578364	Fe	0.017602659311489	K	0.92461527303085	0.102112287765151	2099.91270936067
Al	0.02	Ba	0.035602178578364	Fe	0.017602659311489	La	0.92461527303085	0.162299470206878	2540.06444601429
Al	0.02	Ba	0.035602178578364	Fe	0.017602659311489	Li	0.92461527303085	0.108509221446866	5806.45364960167
Al	0.02	Ba	0.035602178578364	Fe	0.017602659311489	Mg	0.92461527303085	0.123845961222348	4511.01759098744
Al	0.02	Ba	0.035602178578364	Fe	0.017602659311489	Mn	0.92461527303085	0.136485636482664	5018.81369980046
Al	0.02	Ba	0.035602178578364	Fe	0.017602659311489	Mo	0.92461527303085	0.13276315741638	5982.51434426312
Al	0.02	Ba	0.035602178578364	Fe	0.017602659311489	Na	0.92461527303085	0.097501721489585	3211.87499143297
Al	0.02	Ba	0.035602178578364	Fe	0.017602659311489	Nd	0.92461527303085	0.17471360245098	2405.70233693056
Al	0.02	Ba	0.035602178578364	Fe	0.017602659311489	Ni	0.92461527303085	0.147533352409146	4852.01935748962
Al	0.02	Ba	0.035602178578364	Fe	0.017602659311489	Rb	0.92461527303085	0.108132080906196	1451.2680448185
Al	0.02	Ba	0.035602178578364	Fe	0.017602659311489	Pd	0.92461527303085	0.144587393669842	3091.41241087514
Al	0.02	Ba	0.035602178578364	Fe	0.017602659311489	Si	0.92461527303085	0.176533514052639	2285.23975637272
Al	0.02	Ba	0.035602178578364	Fe	0.017602659311489	Sm	0.92461527303085	0.182987528464833	2220.37528991851
Al	0.02	Ba	0.035602178578364	Fe	0.017602659311489	Sr	0.92461527303085	0.120940218452246	4420.4223655111
Al	0.02	Ba	0.035602178578364	Fe	0.017602659311489	Ti	0.92461527303085	0.125439495836081	4082.91211238961
Al	0.02	Ba	0.035602178578364	Fe	0.017602659311489	V	0.92461527303085	0.129118886363935	4472.09891111491
Al	0.02	Ba	0.035602178578364	Fe	0.017602659311489	W	0.92461527303085	0.232638868283925	5041.05294544191
Al	0.02	Ba	0.035602178578364	Fe	0.017602659311489	Y	0.92461527303085	0.123896555506182	3304.538514939
Al	0.02	Ba	0.035602178578364	Fe	0.017602659311489	Yb	0.92461527303085	0.216088792331655	1719.99226298597
Al	0.02	Ba	0.035602178578364	Fe	0.017602659311489	Zn	0.92461527303085	0.1548954693517	3675.1926089631
Al	0.02	Ba	0.035602178578364	Fe	0.017602659311489	Zr	0.92461527303085	0.126852614569548	3767.85613246912
Al	0.02	Ba	0.035602178578364	Hf	0.017602659311489	Al	0.92461527303085	0.151794552894913	4938.9638195752
Al	0.02	Ba	0.035602178578364	Hf	0.017602659311489	Ba	0.92461527303085	0.159764171897572	1714.27320156553
Al	0.02	Ba	0.035602178578364	Hf	0.017602659311489	Bi	0.92461527303085	0.181723944352124	1871.80119152578
Al	0.02	Ba	0.035602178578364	Hf	0.017602659311489	Ca	0.92461527303085	0.11967172317279	3743.60436634748
Al	0.02	Ba	0.035602178578364	Hf	0.017602659311489	Ce	0.92461527303085	0.168040321835989	2159.05811439445
Al	0.02	Ba	0.035602178578364	Hf	0.017602659311489	Co	0.92461527303085	0.145454792607201	4586.84243025231
Al	0.02	Ba	0.035602178578364	Hf	0.017602659311489	Cs	0.92461527303085	0.155625726274269	2230.66660336375
Al	0.02	Ba	0.035602178578364	Hf	0.017602659311489	Cu	0.92461527303085	0.152807921187974	3521.21190993302
Al	0.02	Ba	0.035602178578364	Hf	0.017602659311489	Eu	0.92461527303085	0.188727453458709	2868.07367144688
Al	0.02	Ba	0.035602178578364	Hf	0.017602659311489	Fe	0.92461527303085	0.141763911802432	4762.90312491375
Al	0.02	Ba	0.035602178578364	Hf	0.017602659311489	Hf	0.92461527303085	0.225841047893342	3002.29617829928
Al	0.02	Ba	0.035602178578364	Hf	0.017602659311489	In	0.92461527303085	0.164908294741485	1338.98593136613
Al	0.02	Ba	0.035602178578364	Hf	0.017602659311489	K	0.92461527303085	0.103712933164012	2066.39459088843
Al	0.02	Ba	0.035602178578364	Hf	0.017602659311489	La	0.92461527303085	0.16390011560574	2506.54632754205
Al	0.02	Ba	0.035602178578364	Hf	0.017602659311489	Li	0.92461527303085	0.110109866845727	5772.93553112943
Al	0.02	Ba	0.035602178578364	Hf	0.017602659311489	Mg	0.92461527303085	0.125446606621209	4477.4994725152
Al	0.02	Ba	0.035602178578364	Hf	0.017602659311489	Mn	0.92461527303085	0.138086281881525	4985.29558132821
Al	0.02	Ba	0.035602178578364	Hf	0.017602659311489	Mo	0.92461527303085	0.134363802815241	5948.99622579087
Al	0.02	Ba	0.035602178578364	Hf	0.017602659311489	Na	0.92461527303085	0.099102366888447	3178.35687296073
Al	0.02	Ba	0.035602178578364	Hf	0.017602659311489	Nd	0.92461527303085	0.176314247849842	2372.18421845831
Al	0.02	Ba	0.035602178578364	Hf	0.017602659311489	Ni	0.92461527303085	0.149133997808008	4818.50123901737
Al	0.02	Ba	0.035602178578364	Hf	0.017602659311489	Rb	0.92461527303085	0.109732726305058	1417.74992634625
Al	0.02	Ba	0.035602178578364	Hf	0.017602659311489	Pd	0.92461527303085	0.146188039068704	3057.89429240289
Al	0.02	Ba	0.035602178578364	Hf	0.017602659311489	Si	0.92461527303085	0.1781341594515	2251.72163790048
Al	0.02	Ba	0.035602178578364	Hf	0.017602659311489	Sm	0.92461527303085	0.184588173863695	2186.85717144626
Al	0.02	Ba	0.035602178578364	Hf	0.017602659311489	Sr	0.92461527303085	0.122540863851107	4386.90424703886
Al	0.02	Ba	0.035602178578364	Hf	0.017602659311489	Ti	0.92461527303085	0.127040141234942	4049.39399391736
Al	0.02	Ba	0.035602178578364	Hf	0.017602659311489	V	0.92461527303085	0.130719531762796	4438.58079264267
Al	0.02	Ba	0.035602178578364	Hf	0.017602659311489	W	0.92461527303085	0.234239513682787	5007.53482696966
Al	0.02	Ba	0.035602178578364	Hf	0.017602659311489	Y	0.92461527303085	0.125497200905044	3271.02039646675
Al	0.02	Ba	0.035602178578364	Hf	0.017602659311489	Yb	0.92461527303085	0.217689437730517	1686.47414451373
Al	0.02	Ba	0.035602178578364	Hf	0.017602659311489	Zn	0.92461527303085	0.156496114750561	3641.67449049085
Al	0.02	Ba	0.035602178578364	Hf	0.017602659311489	Zr	0.92461527303085	0.128453259968409	3734.33801399688
Al	0.02	Ba	0.035602178578364	In	0.017602659311489	Al	0.92461527303085	0.150634526096818	4907.29801817642
Al	0.02	Ba	0.035602178578364	In	0.017602659311489	Ba	0.92461527303085	0.158604145099477	1682.60740016675
Al	0.02	Ba	0.035602178578364	In	0.017602659311489	Bi	0.92461527303085	0.180563917554029	1840.135390127
Al	0.02	Ba	0.035602178578364	In	0.017602659311489	Ca	0.92461527303085	0.118511696374696	3711.9385649487
Al	0.02	Ba	0.035602178578364	In	0.017602659311489	Ce	0.92461527303085	0.166880295037894	2127.39231299567
Al	0.02	Ba	0.035602178578364	In	0.017602659311489	Co	0.92461527303085	0.144294765809106	4555.17662885353
Al	0.02	Ba	0.035602178578364	In	0.017602659311489	Cs	0.92461527303085	0.154465699476175	2199.00080196497
Al	0.02	Ba	0.035602178578364	In	0.017602659311489	Cu	0.92461527303085	0.15164789438988	3489.54610853424
Al	0.02	Ba	0.035602178578364	In	0.017602659311489	Eu	0.92461527303085	0.187567426660614	2836.4078700481
Al	0.02	Ba	0.035602178578364	In	0.017602659311489	Fe	0.92461527303085	0.140603885004338	4731.23732351498
Al	0.02	Ba	0.035602178578364	In	0.017602659311489	Hf	0.92461527303085	0.224681021095248	2970.6303769005
Al	0.02	Ba	0.035602178578364	In	0.017602659311489	In	0.92461527303085	0.163748267943391	1307.32012996735
Al	0.02	Ba	0.035602178578364	In	0.017602659311489	K	0.92461527303085	0.102552906365918	2034.72878948965
Al	0.02	Ba	0.035602178578364	In	0.017602659311489	La	0.92461527303085	0.162740088807645	2474.88052614327
Al	0.02	Ba	0.035602178578364	In	0.017602659311489	Li	0.92461527303085	0.108949840047633	5741.26972973065
Al	0.02	Ba	0.035602178578364	In	0.017602659311489	Mg	0.92461527303085	0.124286579823115	4445.83367111642
Al	0.02	Ba	0.035602178578364	In	0.017602659311489	Mn	0.92461527303085	0.136926255083431	4953.62977992944
Al	0.02	Ba	0.035602178578364	In	0.017602659311489	Mo	0.92461527303085	0.133203776017147	5917.33042439209
Al	0.02	Ba	0.035602178578364	In	0.017602659311489	Na	0.92461527303085	0.097942340090352	3146.69107156195
Al	0.02	Ba	0.035602178578364	In	0.017602659311489	Nd	0.92461527303085	0.175154221051747	2340.51841705953
Al	0.02	Ba	0.035602178578364	In	0.017602659311489	Ni	0.92461527303085	0.147973971009913	4786.83543761859
Al	0.02	Ba	0.035602178578364	In	0.017602659311489	Rb	0.92461527303085	0.108572699506963	1386.08412494747
Al	0.02	Ba	0.035602178578364	In	0.017602659311489	Pd	0.92461527303085	0.14502801227061	3026.22849100412
Al	0.02	Ba	0.035602178578364	In	0.017602659311489	Si	0.92461527303085	0.176974132653406	2220.0558365017
Al	0.02	Ba	0.035602178578364	In	0.017602659311489	Sm	0.92461527303085	0.1834281470656	2155.19137004748
Al	0.02	Ba	0.035602178578364	In	0.017602659311489	Sr	0.92461527303085	0.121380837053013	4355.23844564008
Al	0.02	Ba	0.035602178578364	In	0.017602659311489	Ti	0.92461527303085	0.125880114436848	4017.72819251858
Al	0.02	Ba	0.035602178578364	In	0.017602659311489	V	0.92461527303085	0.129559504964702	4406.91499124389
Al	0.02	Ba	0.035602178578364	In	0.017602659311489	W	0.92461527303085	0.233079486884693	4975.86902557088
Al	0.02	Ba	0.035602178578364	In	0.017602659311489	Y	0.92461527303085	0.124337174106949	3239.35459506797
Al	0.02	Ba	0.035602178578364	In	0.017602659311489	Yb	0.92461527303085	0.216529410932423	1654.80834311495
Al	0.02	Ba	0.035602178578364	In	0.017602659311489	Zn	0.92461527303085	0.155336087952467	3610.00868909207
Al	0.02	Ba	0.035602178578364	In	0.017602659311489	Zr	0.92461527303085	0.127293233170315	3702.6722125981
Al	0.02	Ba	0.035602178578364	K	0.017602659311489	Al	0.92461527303085	0.149469499806737	4921.14629343996
Al	0.02	Ba	0.035602178578364	K	0.017602659311489	Ba	0.92461527303085	0.157439118809396	1696.45567543029
Al	0.02	Ba	0.035602178578364	K	0.017602659311489	Bi	0.92461527303085	0.179398891263948	1853.98366539053
Al	0.02	Ba	0.035602178578364	K	0.017602659311489	Ca	0.92461527303085	0.117346670084615	3725.78684021223
Al	0.02	Ba	0.035602178578364	K	0.017602659311489	Ce	0.92461527303085	0.165715268747813	2141.24058825921
Al	0.02	Ba	0.035602178578364	K	0.017602659311489	Co	0.92461527303085	0.143129739519025	4569.02490411706
Al	0.02	Ba	0.035602178578364	K	0.017602659311489	Cs	0.92461527303085	0.153300673186093	2212.8490772285
Al	0.02	Ba	0.035602178578364	K	0.017602659311489	Cu	0.92461527303085	0.150482868099799	3503.39438379777
Al	0.02	Ba	0.035602178578364	K	0.017602659311489	Eu	0.92461527303085	0.186402400370533	2850.25614531164
Al	0.02	Ba	0.035602178578364	K	0.017602659311489	Fe	0.92461527303085	0.139438858714257	4745.08559877851
Al	0.02	Ba	0.035602178578364	K	0.017602659311489	Hf	0.92461527303085	0.223515994805166	2984.47865216403
Al	0.02	Ba	0.035602178578364	K	0.017602659311489	In	0.92461527303085	0.162583241653309	1321.16840523089
Al	0.02	Ba	0.035602178578364	K	0.017602659311489	K	0.92461527303085	0.101387880075837	2048.57706475318
Al	0.02	Ba	0.035602178578364	K	0.017602659311489	La	0.92461527303085	0.161575062517564	2488.7288014068
Al	0.02	Ba	0.035602178578364	K	0.017602659311489	Li	0.92461527303085	0.107784813757551	5755.11800499418
Al	0.02	Ba	0.035602178578364	K	0.017602659311489	Mg	0.92461527303085	0.123121553533034	4459.68194637995
Al	0.02	Ba	0.035602178578364	K	0.017602659311489	Mn	0.92461527303085	0.135761228793349	4967.47805519297
Al	0.02	Ba	0.035602178578364	K	0.017602659311489	Mo	0.92461527303085	0.132038749727065	5931.17869965563
Al	0.02	Ba	0.035602178578364	K	0.017602659311489	Na	0.92461527303085	0.096777313800271	3160.53934682548
Al	0.02	Ba	0.035602178578364	K	0.017602659311489	Nd	0.92461527303085	0.173989194761666	2354.36669232306
Al	0.02	Ba	0.035602178578364	K	0.017602659311489	Ni	0.92461527303085	0.146808944719832	4800.68371288212
Al	0.02	Ba	0.035602178578364	K	0.017602659311489	Rb	0.92461527303085	0.107407673216882	1399.93240021101
Al	0.02	Ba	0.035602178578364	K	0.017602659311489	Pd	0.92461527303085	0.143862985980528	3040.07676626765
Al	0.02	Ba	0.035602178578364	K	0.017602659311489	Si	0.92461527303085	0.175809106363324	2233.90411176523
Al	0.02	Ba	0.035602178578364	K	0.017602659311489	Sm	0.92461527303085	0.182263120775519	2169.03964531101
Al	0.02	Ba	0.035602178578364	K	0.017602659311489	Sr	0.92461527303085	0.120215810762932	4369.08672090361
Al	0.02	Ba	0.035602178578364	K	0.017602659311489	Ti	0.92461527303085	0.124715088146767	4031.57646778212
Al	0.02	Ba	0.035602178578364	K	0.017602659311489	V	0.92461527303085	0.12839447867462	4420.76326650742
Al	0.02	Ba	0.035602178578364	K	0.017602659311489	W	0.92461527303085	0.231914460594611	4989.71730083441
Al	0.02	Ba	0.035602178578364	K	0.017602659311489	Y	0.92461527303085	0.123172147816868	3253.20287033151
Al	0.02	Ba	0.035602178578364	K	0.017602659311489	Yb	0.92461527303085	0.215364384642341	1668.65661837848
Al	0.02	Ba	0.035602178578364	K	0.017602659311489	Zn	0.92461527303085	0.154171061662385	3623.85696435561
Al	0.02	Ba	0.035602178578364	K	0.017602659311489	Zr	0.92461527303085	0.126128206880234	3716.52048786163
Al	0.02	Ba	0.035602178578364	La	0.017602659311489	Al	0.92461527303085	0.150615332563714	4929.52582305802
Al	0.02	Ba	0.035602178578364	La	0.017602659311489	Ba	0.92461527303085	0.158584951566373	1704.83520504835
Al	0.02	Ba	0.035602178578364	La	0.017602659311489	Bi	0.92461527303085	0.180544724020925	1862.36319500859
Al	0.02	Ba	0.035602178578364	La	0.017602659311489	Ca	0.92461527303085	0.118492502841592	3734.16636983029
Al	0.02	Ba	0.035602178578364	La	0.017602659311489	Ce	0.92461527303085	0.16686110150479	2149.62011787727
Al	0.02	Ba	0.035602178578364	La	0.017602659311489	Co	0.92461527303085	0.144275572276002	4577.40443373512
Al	0.02	Ba	0.035602178578364	La	0.017602659311489	Cs	0.92461527303085	0.154446505943071	2221.22860684656
Al	0.02	Ba	0.035602178578364	La	0.017602659311489	Cu	0.92461527303085	0.151628700856776	3511.77391341583
Al	0.02	Ba	0.035602178578364	La	0.017602659311489	Eu	0.92461527303085	0.18754823312751	2858.6356749297
Al	0.02	Ba	0.035602178578364	La	0.017602659311489	Fe	0.92461527303085	0.140584691471234	4753.46512839657
Al	0.02	Ba	0.035602178578364	La	0.017602659311489	Hf	0.92461527303085	0.224661827562143	2992.85818178209
Al	0.02	Ba	0.035602178578364	La	0.017602659311489	In	0.92461527303085	0.163729074410287	1329.54793484895
Al	0.02	Ba	0.035602178578364	La	0.017602659311489	K	0.92461527303085	0.102533712832814	2056.95659437124
Al	0.02	Ba	0.035602178578364	La	0.017602659311489	La	0.92461527303085	0.162720895274541	2497.10833102486
Al	0.02	Ba	0.035602178578364	La	0.017602659311489	Li	0.92461527303085	0.108930646514529	5763.49753461224
Al	0.02	Ba	0.035602178578364	La	0.017602659311489	Mg	0.92461527303085	0.124267386290011	4468.06147599801
Al	0.02	Ba	0.035602178578364	La	0.017602659311489	Mn	0.92461527303085	0.136907061550327	4975.85758481103
Al	0.02	Ba	0.035602178578364	La	0.017602659311489	Mo	0.92461527303085	0.133184582484043	5939.55822927369
Al	0.02	Ba	0.035602178578364	La	0.017602659311489	Na	0.92461527303085	0.097923146557248	3168.91887644354
Al	0.02	Ba	0.035602178578364	La	0.017602659311489	Nd	0.92461527303085	0.175135027518643	2362.74622194113
Al	0.02	Ba	0.035602178578364	La	0.017602659311489	Ni	0.92461527303085	0.147954777476809	4809.06324250019
Al	0.02	Ba	0.035602178578364	La	0.017602659311489	Rb	0.92461527303085	0.108553505973859	1408.31192982907
Al	0.02	Ba	0.035602178578364	La	0.017602659311489	Pd	0.92461527303085	0.145008818737505	3048.45629588571
Al	0.02	Ba	0.035602178578364	La	0.017602659311489	Si	0.92461527303085	0.176954939120302	2242.28364138329
Al	0.02	Ba	0.035602178578364	La	0.017602659311489	Sm	0.92461527303085	0.183408953532496	2177.41917492908
Al	0.02	Ba	0.035602178578364	La	0.017602659311489	Sr	0.92461527303085	0.121361643519909	4377.46625052167
Al	0.02	Ba	0.035602178578364	La	0.017602659311489	Ti	0.92461527303085	0.125860920903744	4039.95599740018
Al	0.02	Ba	0.035602178578364	La	0.017602659311489	V	0.92461527303085	0.129540311431598	4429.14279612548
Al	0.02	Ba	0.035602178578364	La	0.017602659311489	W	0.92461527303085	0.233060293351589	4998.09683045248
Al	0.02	Ba	0.035602178578364	La	0.017602659311489	Y	0.92461527303085	0.124317980573845	3261.58239994957
Al	0.02	Ba	0.035602178578364	La	0.017602659311489	Yb	0.92461527303085	0.216510217399318	1677.03614799654
Al	0.02	Ba	0.035602178578364	La	0.017602659311489	Zn	0.92461527303085	0.155316894419363	3632.23649397367
Al	0.02	Ba	0.035602178578364	La	0.017602659311489	Zr	0.92461527303085	0.127274039637211	3724.90001747969
Al	0.02	Ba	0.035602178578364	Li	0.017602659311489	Al	0.92461527303085	0.149591283479927	4991.71075338152
Al	0.02	Ba	0.035602178578364	Li	0.017602659311489	Ba	0.92461527303085	0.157560902482586	1767.02013537186
Al	0.02	Ba	0.035602178578364	Li	0.017602659311489	Bi	0.92461527303085	0.179520674937138	1924.5481253321
Al	0.02	Ba	0.035602178578364	Li	0.017602659311489	Ca	0.92461527303085	0.117468453757805	3796.3513001538
Al	0.02	Ba	0.035602178578364	Li	0.017602659311489	Ce	0.92461527303085	0.165837052421003	2211.80504820078
Al	0.02	Ba	0.035602178578364	Li	0.017602659311489	Co	0.92461527303085	0.143251523192215	4639.58936405863
Al	0.02	Ba	0.035602178578364	Li	0.017602659311489	Cs	0.92461527303085	0.153422456859284	2283.41353717007
Al	0.02	Ba	0.035602178578364	Li	0.017602659311489	Cu	0.92461527303085	0.150604651772989	3573.95884373934
Al	0.02	Ba	0.035602178578364	Li	0.017602659311489	Eu	0.92461527303085	0.186524184043723	2920.8206052532
Al	0.02	Ba	0.035602178578364	Li	0.017602659311489	Fe	0.92461527303085	0.139560642387447	4815.65005872008
Al	0.02	Ba	0.035602178578364	Li	0.017602659311489	Hf	0.92461527303085	0.223637778478356	3055.0431121056
Al	0.02	Ba	0.035602178578364	Li	0.017602659311489	In	0.92461527303085	0.1627050253265	1391.73286517245
Al	0.02	Ba	0.035602178578364	Li	0.017602659311489	K	0.92461527303085	0.101509663749027	2119.14152469475
Al	0.02	Ba	0.035602178578364	Li	0.017602659311489	La	0.92461527303085	0.161696846190754	2559.29326134837
Al	0.02	Ba	0.035602178578364	Li	0.017602659311489	Li	0.92461527303085	0.107906597430742	5825.68246493575
Al	0.02	Ba	0.035602178578364	Li	0.017602659311489	Mg	0.92461527303085	0.123243337206224	4530.24640632152
Al	0.02	Ba	0.035602178578364	Li	0.017602659311489	Mn	0.92461527303085	0.13588301246654	5038.04251513454
Al	0.02	Ba	0.035602178578364	Li	0.017602659311489	Mo	0.92461527303085	0.132160533400256	6001.7431595972
Al	0.02	Ba	0.035602178578364	Li	0.017602659311489	Na	0.92461527303085	0.096899097473461	3231.10380676705
Al	0.02	Ba	0.035602178578364	Li	0.017602659311489	Nd	0.92461527303085	0.174110978434856	2424.93115226463
Al	0.02	Ba	0.035602178578364	Li	0.017602659311489	Ni	0.92461527303085	0.146930728393022	4871.24817282369
Al	0.02	Ba	0.035602178578364	Li	0.017602659311489	Rb	0.92461527303085	0.107529456890072	1470.49686015258
Al	0.02	Ba	0.035602178578364	Li	0.017602659311489	Pd	0.92461527303085	0.143984769653718	3110.64122620922
Al	0.02	Ba	0.035602178578364	Li	0.017602659311489	Si	0.92461527303085	0.175930890036515	2304.4685717068
Al	0.02	Ba	0.035602178578364	Li	0.017602659311489	Sm	0.92461527303085	0.182384904448709	2239.60410525258
Al	0.02	Ba	0.035602178578364	Li	0.017602659311489	Sr	0.92461527303085	0.120337594436122	4439.65118084518
Al	0.02	Ba	0.035602178578364	Li	0.017602659311489	Ti	0.92461527303085	0.124836871819957	4102.14092772369
Al	0.02	Ba	0.035602178578364	Li	0.017602659311489	V	0.92461527303085	0.128516262347811	4491.32772644899
Al	0.02	Ba	0.035602178578364	Li	0.017602659311489	W	0.92461527303085	0.232036244267801	5060.28176077598
Al	0.02	Ba	0.035602178578364	Li	0.017602659311489	Y	0.92461527303085	0.123293931490058	3323.76733027308
Al	0.02	Ba	0.035602178578364	Li	0.017602659311489	Yb	0.92461527303085	0.215486168315531	1739.22107832005
Al	0.02	Ba	0.035602178578364	Li	0.017602659311489	Zn	0.92461527303085	0.154292845335576	3694.42142429718
Al	0.02	Ba	0.035602178578364	Li	0.017602659311489	Zr	0.92461527303085	0.126249990553424	3787.0849478032
Al	0.02	Ba	0.035602178578364	Mg	0.017602659311489	Al	0.92461527303085	0.14988326157405	4967.04847463195
Al	0.02	Ba	0.035602178578364	Mg	0.017602659311489	Ba	0.92461527303085	0.157852880576709	1742.35785662228
Al	0.02	Ba	0.035602178578364	Mg	0.017602659311489	Bi	0.92461527303085	0.179812653031261	1899.88584658252
Al	0.02	Ba	0.035602178578364	Mg	0.017602659311489	Ca	0.92461527303085	0.117760431851928	3771.68902140422
Al	0.02	Ba	0.035602178578364	Mg	0.017602659311489	Ce	0.92461527303085	0.166129030515126	2187.1427694512
Al	0.02	Ba	0.035602178578364	Mg	0.017602659311489	Co	0.92461527303085	0.143543501286338	4614.92708530905
Al	0.02	Ba	0.035602178578364	Mg	0.017602659311489	Cs	0.92461527303085	0.153714434953407	2258.75125842049
Al	0.02	Ba	0.035602178578364	Mg	0.017602659311489	Cu	0.92461527303085	0.150896629867112	3549.29656498976
Al	0.02	Ba	0.035602178578364	Mg	0.017602659311489	Eu	0.92461527303085	0.186816162137847	2896.15832650363
Al	0.02	Ba	0.035602178578364	Mg	0.017602659311489	Fe	0.92461527303085	0.13985262048157	4790.9877799705
Al	0.02	Ba	0.035602178578364	Mg	0.017602659311489	Hf	0.92461527303085	0.22392975657248	3030.38083335602
Al	0.02	Ba	0.035602178578364	Mg	0.017602659311489	In	0.92461527303085	0.162997003420623	1367.07058642288
Al	0.02	Ba	0.035602178578364	Mg	0.017602659311489	K	0.92461527303085	0.10180164184315	2094.47924594517
Al	0.02	Ba	0.035602178578364	Mg	0.017602659311489	La	0.92461527303085	0.161988824284877	2534.63098259879
Al	0.02	Ba	0.035602178578364	Mg	0.017602659311489	Li	0.92461527303085	0.108198575524865	5801.02018618617
Al	0.02	Ba	0.035602178578364	Mg	0.017602659311489	Mg	0.92461527303085	0.123535315300347	4505.58412757194
Al	0.02	Ba	0.035602178578364	Mg	0.017602659311489	Mn	0.92461527303085	0.136174990560663	5013.38023638496
Al	0.02	Ba	0.035602178578364	Mg	0.017602659311489	Mo	0.92461527303085	0.132452511494379	5977.08088084762
Al	0.02	Ba	0.035602178578364	Mg	0.017602659311489	Na	0.92461527303085	0.097191075567584	3206.44152801747
Al	0.02	Ba	0.035602178578364	Mg	0.017602659311489	Nd	0.92461527303085	0.174402956528979	2400.26887351505
Al	0.02	Ba	0.035602178578364	Mg	0.017602659311489	Ni	0.92461527303085	0.147222706487145	4846.58589407411
Al	0.02	Ba	0.035602178578364	Mg	0.017602659311489	Rb	0.92461527303085	0.107821434984195	1445.834581403
Al	0.02	Ba	0.035602178578364	Mg	0.017602659311489	Pd	0.92461527303085	0.144276747747842	3085.97894745964
Al	0.02	Ba	0.035602178578364	Mg	0.017602659311489	Si	0.92461527303085	0.176222868130638	2279.80629295722
Al	0.02	Ba	0.035602178578364	Mg	0.017602659311489	Sm	0.92461527303085	0.182676882542832	2214.941826503
Al	0.02	Ba	0.035602178578364	Mg	0.017602659311489	Sr	0.92461527303085	0.120629572530245	4414.9889020956
Al	0.02	Ba	0.035602178578364	Mg	0.017602659311489	Ti	0.92461527303085	0.12512884991408	4077.47864897411
Al	0.02	Ba	0.035602178578364	Mg	0.017602659311489	V	0.92461527303085	0.128808240441934	4466.66544769941
Al	0.02	Ba	0.035602178578364	Mg	0.017602659311489	W	0.92461527303085	0.232328222361925	5035.61948202641
Al	0.02	Ba	0.035602178578364	Mg	0.017602659311489	Y	0.92461527303085	0.123585909584181	3299.1050515235
Al	0.02	Ba	0.035602178578364	Mg	0.017602659311489	Yb	0.92461527303085	0.215778146409655	1714.55879957047
Al	0.02	Ba	0.035602178578364	Mg	0.017602659311489	Zn	0.92461527303085	0.154584823429699	3669.7591455476
Al	0.02	Ba	0.035602178578364	Mg	0.017602659311489	Zr	0.92461527303085	0.126541968647547	3762.42266905362
Al	0.02	Ba	0.035602178578364	Mn	0.017602659311489	Al	0.92461527303085	0.150123893438897	4976.71580564394
Al	0.02	Ba	0.035602178578364	Mn	0.017602659311489	Ba	0.92461527303085	0.158093512441556	1752.02518763427
Al	0.02	Ba	0.035602178578364	Mn	0.017602659311489	Bi	0.92461527303085	0.180053284896108	1909.55317759452
Al	0.02	Ba	0.035602178578364	Mn	0.017602659311489	Ca	0.92461527303085	0.118001063716775	3781.35635241622
Al	0.02	Ba	0.035602178578364	Mn	0.017602659311489	Ce	0.92461527303085	0.166369662379973	2196.81010046319
Al	0.02	Ba	0.035602178578364	Mn	0.017602659311489	Co	0.92461527303085	0.143784133151185	4624.59441632105
Al	0.02	Ba	0.035602178578364	Mn	0.017602659311489	Cs	0.92461527303085	0.153955066818253	2268.41858943249
Al	0.02	Ba	0.035602178578364	Mn	0.017602659311489	Cu	0.92461527303085	0.151137261731959	3558.96389600176
Al	0.02	Ba	0.035602178578364	Mn	0.017602659311489	Eu	0.92461527303085	0.187056794002693	2905.82565751562
Al	0.02	Ba	0.035602178578364	Mn	0.017602659311489	Fe	0.92461527303085	0.140093252346417	4800.65511098249
Al	0.02	Ba	0.035602178578364	Mn	0.017602659311489	Hf	0.92461527303085	0.224170388437326	3040.04816436802
Al	0.02	Ba	0.035602178578364	Mn	0.017602659311489	In	0.92461527303085	0.16323763528547	1376.73791743487
Al	0.02	Ba	0.035602178578364	Mn	0.017602659311489	K	0.92461527303085	0.102042273707997	2104.14657695717
Al	0.02	Ba	0.035602178578364	Mn	0.017602659311489	La	0.92461527303085	0.162229456149724	2544.29831361079
Al	0.02	Ba	0.035602178578364	Mn	0.017602659311489	Li	0.92461527303085	0.108439207389712	5810.68751719817
Al	0.02	Ba	0.035602178578364	Mn	0.017602659311489	Mg	0.92461527303085	0.123775947165194	4515.25145858394
Al	0.02	Ba	0.035602178578364	Mn	0.017602659311489	Mn	0.92461527303085	0.13641562242551	5023.04756739695
Al	0.02	Ba	0.035602178578364	Mn	0.017602659311489	Mo	0.92461527303085	0.132693143359226	5986.74821185961
Al	0.02	Ba	0.035602178578364	Mn	0.017602659311489	Na	0.92461527303085	0.097431707432431	3216.10885902947
Al	0.02	Ba	0.035602178578364	Mn	0.017602659311489	Nd	0.92461527303085	0.174643588393826	2409.93620452705
Al	0.02	Ba	0.035602178578364	Mn	0.017602659311489	Ni	0.92461527303085	0.147463338351992	4856.25322508611
Al	0.02	Ba	0.035602178578364	Mn	0.017602659311489	Rb	0.92461527303085	0.108062066849042	1455.50191241499
Al	0.02	Ba	0.035602178578364	Mn	0.017602659311489	Pd	0.92461527303085	0.144517379612688	3095.64627847163
Al	0.02	Ba	0.035602178578364	Mn	0.017602659311489	Si	0.92461527303085	0.176463499995485	2289.47362396922
Al	0.02	Ba	0.035602178578364	Mn	0.017602659311489	Sm	0.92461527303085	0.182917514407679	2224.609157515
Al	0.02	Ba	0.035602178578364	Mn	0.017602659311489	Sr	0.92461527303085	0.120870204395092	4424.6562331076
Al	0.02	Ba	0.035602178578364	Mn	0.017602659311489	Ti	0.92461527303085	0.125369481778927	4087.1459799861
Al	0.02	Ba	0.035602178578364	Mn	0.017602659311489	V	0.92461527303085	0.129048872306781	4476.33277871141
Al	0.02	Ba	0.035602178578364	Mn	0.017602659311489	W	0.92461527303085	0.232568854226771	5045.2868130384
Al	0.02	Ba	0.035602178578364	Mn	0.017602659311489	Y	0.92461527303085	0.123826541449028	3308.77238253549
Al	0.02	Ba	0.035602178578364	Mn	0.017602659311489	Yb	0.92461527303085	0.216018778274501	1724.22613058246
Al	0.02	Ba	0.035602178578364	Mn	0.017602659311489	Zn	0.92461527303085	0.154825455294546	3679.42647655959
Al	0.02	Ba	0.035602178578364	Mn	0.017602659311489	Zr	0.92461527303085	0.126782600512394	3772.09000006562
Al	0.02	Ba	0.035602178578364	Mo	0.017602659311489	Al	0.92461527303085	0.150053025551778	4995.06256522875
Al	0.02	Ba	0.035602178578364	Mo	0.017602659311489	Ba	0.92461527303085	0.158022644554437	1770.37194721908
Al	0.02	Ba	0.035602178578364	Mo	0.017602659311489	Bi	0.92461527303085	0.179982417008989	1927.89993717932
Al	0.02	Ba	0.035602178578364	Mo	0.017602659311489	Ca	0.92461527303085	0.117930195829655	3799.70311200103
Al	0.02	Ba	0.035602178578364	Mo	0.017602659311489	Ce	0.92461527303085	0.166298794492854	2215.156860048
Al	0.02	Ba	0.035602178578364	Mo	0.017602659311489	Co	0.92461527303085	0.143713265264066	4642.94117590586
Al	0.02	Ba	0.035602178578364	Mo	0.017602659311489	Cs	0.92461527303085	0.153884198931134	2286.76534901729
Al	0.02	Ba	0.035602178578364	Mo	0.017602659311489	Cu	0.92461527303085	0.151066393844839	3577.31065558657
Al	0.02	Ba	0.035602178578364	Mo	0.017602659311489	Eu	0.92461527303085	0.186985926115574	2924.17241710043
Al	0.02	Ba	0.035602178578364	Mo	0.017602659311489	Fe	0.92461527303085	0.140022384459297	4819.0018705673
Al	0.02	Ba	0.035602178578364	Mo	0.017602659311489	Hf	0.92461527303085	0.224099520550207	3058.39492395283
Al	0.02	Ba	0.035602178578364	Mo	0.017602659311489	In	0.92461527303085	0.16316676739835	1395.08467701968
Al	0.02	Ba	0.035602178578364	Mo	0.017602659311489	K	0.92461527303085	0.101971405820877	2122.49333654198
Al	0.02	Ba	0.035602178578364	Mo	0.017602659311489	La	0.92461527303085	0.162158588262605	2562.64507319559
Al	0.02	Ba	0.035602178578364	Mo	0.017602659311489	Li	0.92461527303085	0.108368339502592	5829.03427678297
Al	0.02	Ba	0.035602178578364	Mo	0.017602659311489	Mg	0.92461527303085	0.123705079278074	4533.59821816875
Al	0.02	Ba	0.035602178578364	Mo	0.017602659311489	Mn	0.92461527303085	0.13634475453839	5041.39432698176
Al	0.02	Ba	0.035602178578364	Mo	0.017602659311489	Mo	0.92461527303085	0.132622275472106	6005.09497144442
Al	0.02	Ba	0.035602178578364	Mo	0.017602659311489	Na	0.92461527303085	0.097360839545312	3234.45561861427
Al	0.02	Ba	0.035602178578364	Mo	0.017602659311489	Nd	0.92461527303085	0.174572720506707	2428.28296411186
Al	0.02	Ba	0.035602178578364	Mo	0.017602659311489	Ni	0.92461527303085	0.147392470464873	4874.59998467092
Al	0.02	Ba	0.035602178578364	Mo	0.017602659311489	Rb	0.92461527303085	0.107991198961923	1473.8486719998
Al	0.02	Ba	0.035602178578364	Mo	0.017602659311489	Pd	0.92461527303085	0.144446511725569	3113.99303805644
Al	0.02	Ba	0.035602178578364	Mo	0.017602659311489	Si	0.92461527303085	0.176392632108365	2307.82038355403
Al	0.02	Ba	0.035602178578364	Mo	0.017602659311489	Sm	0.92461527303085	0.18284664652056	2242.95591709981
Al	0.02	Ba	0.035602178578364	Mo	0.017602659311489	Sr	0.92461527303085	0.120799336507972	4443.00299269241
Al	0.02	Ba	0.035602178578364	Mo	0.017602659311489	Ti	0.92461527303085	0.125298613891808	4105.49273957091
Al	0.02	Ba	0.035602178578364	Mo	0.017602659311489	V	0.92461527303085	0.128978004419661	4494.67953829621
Al	0.02	Ba	0.035602178578364	Mo	0.017602659311489	W	0.92461527303085	0.232497986339652	5063.63357262321
Al	0.02	Ba	0.035602178578364	Mo	0.017602659311489	Y	0.92461527303085	0.123755673561909	3327.1191421203
Al	0.02	Ba	0.035602178578364	Mo	0.017602659311489	Yb	0.92461527303085	0.215947910387382	1742.57289016727
Al	0.02	Ba	0.035602178578364	Mo	0.017602659311489	Zn	0.92461527303085	0.154754587407426	3697.7732361444
Al	0.02	Ba	0.035602178578364	Mo	0.017602659311489	Zr	0.92461527303085	0.126711732625274	3790.43675965042
Al	0.02	Ba	0.035602178578364	Na	0.017602659311489	Al	0.92461527303085	0.149381724675015	4942.31563142243
Al	0.02	Ba	0.035602178578364	Na	0.017602659311489	Ba	0.92461527303085	0.157351343677675	1717.62501341276
Al	0.02	Ba	0.035602178578364	Na	0.017602659311489	Bi	0.92461527303085	0.179311116132226	1875.153003373
Al	0.02	Ba	0.035602178578364	Na	0.017602659311489	Ca	0.92461527303085	0.117258894952893	3746.9561781947
Al	0.02	Ba	0.035602178578364	Na	0.017602659311489	Ce	0.92461527303085	0.165627493616092	2162.40992624168
Al	0.02	Ba	0.035602178578364	Na	0.017602659311489	Co	0.92461527303085	0.143041964387304	4590.19424209953
Al	0.02	Ba	0.035602178578364	Na	0.017602659311489	Cs	0.92461527303085	0.153212898054372	2234.01841521097
Al	0.02	Ba	0.035602178578364	Na	0.017602659311489	Cu	0.92461527303085	0.150395092968077	3524.56372178024
Al	0.02	Ba	0.035602178578364	Na	0.017602659311489	Eu	0.92461527303085	0.186314625238812	2871.42548329411
Al	0.02	Ba	0.035602178578364	Na	0.017602659311489	Fe	0.92461527303085	0.139351083582535	4766.25493676098
Al	0.02	Ba	0.035602178578364	Na	0.017602659311489	Hf	0.92461527303085	0.223428219673445	3005.6479901465
Al	0.02	Ba	0.035602178578364	Na	0.017602659311489	In	0.92461527303085	0.162495466521588	1342.33774321336
Al	0.02	Ba	0.035602178578364	Na	0.017602659311489	K	0.92461527303085	0.101300104944115	2069.74640273565
Al	0.02	Ba	0.035602178578364	Na	0.017602659311489	La	0.92461527303085	0.161487287385843	2509.89813938927
Al	0.02	Ba	0.035602178578364	Na	0.017602659311489	Li	0.92461527303085	0.10769703862583	5776.28734297665
Al	0.02	Ba	0.035602178578364	Na	0.017602659311489	Mg	0.92461527303085	0.123033778401312	4480.85128436242
Al	0.02	Ba	0.035602178578364	Na	0.017602659311489	Mn	0.92461527303085	0.135673453661628	4988.64739317544
Al	0.02	Ba	0.035602178578364	Na	0.017602659311489	Mo	0.92461527303085	0.131950974595344	5952.3480376381
Al	0.02	Ba	0.035602178578364	Na	0.017602659311489	Na	0.92461527303085	0.096689538668549	3181.70868480795
Al	0.02	Ba	0.035602178578364	Na	0.017602659311489	Nd	0.92461527303085	0.173901419629945	2375.53603030553
Al	0.02	Ba	0.035602178578364	Na	0.017602659311489	Ni	0.92461527303085	0.14672116958811	4821.85305086459
Al	0.02	Ba	0.035602178578364	Na	0.017602659311489	Rb	0.92461527303085	0.107319898085161	1421.10173819348
Al	0.02	Ba	0.035602178578364	Na	0.017602659311489	Pd	0.92461527303085	0.143775210848807	3061.24610425012
Al	0.02	Ba	0.035602178578364	Na	0.017602659311489	Si	0.92461527303085	0.175721331231603	2255.0734497477
Al	0.02	Ba	0.035602178578364	Na	0.017602659311489	Sm	0.92461527303085	0.182175345643798	2190.20898329348
Al	0.02	Ba	0.035602178578364	Na	0.017602659311489	Sr	0.92461527303085	0.12012803563121	4390.25605888608
Al	0.02	Ba	0.035602178578364	Na	0.017602659311489	Ti	0.92461527303085	0.124627313015045	4052.74580576459
Al	0.02	Ba	0.035602178578364	Na	0.017602659311489	V	0.92461527303085	0.128306703542899	4441.93260448989
Al	0.02	Ba	0.035602178578364	Na	0.017602659311489	W	0.92461527303085	0.23182668546289	5010.88663881689
Al	0.02	Ba	0.035602178578364	Na	0.017602659311489	Y	0.92461527303085	0.123084372685147	3274.37220831398
Al	0.02	Ba	0.035602178578364	Na	0.017602659311489	Yb	0.92461527303085	0.21527660951062	1689.82595636095
Al	0.02	Ba	0.035602178578364	Na	0.017602659311489	Zn	0.92461527303085	0.154083286530664	3645.02630233808
Al	0.02	Ba	0.035602178578364	Na	0.017602659311489	Zr	0.92461527303085	0.126040431748512	3737.6898258441
Al	0.02	Ba	0.035602178578364	Nd	0.017602659311489	Al	0.92461527303085	0.150851670581173	4926.96786138514
Al	0.02	Ba	0.035602178578364	Nd	0.017602659311489	Ba	0.92461527303085	0.158821289583832	1702.27724337547
Al	0.02	Ba	0.035602178578364	Nd	0.017602659311489	Bi	0.92461527303085	0.180781062038384	1859.80523333571
Al	0.02	Ba	0.035602178578364	Nd	0.017602659311489	Ca	0.92461527303085	0.118728840859051	3731.60840815741
Al	0.02	Ba	0.035602178578364	Nd	0.017602659311489	Ce	0.92461527303085	0.16709743952225	2147.06215620439
Al	0.02	Ba	0.035602178578364	Nd	0.017602659311489	Co	0.92461527303085	0.144511910293462	4574.84647206224
Al	0.02	Ba	0.035602178578364	Nd	0.017602659311489	Cs	0.92461527303085	0.15468284396053	2218.67064517368
Al	0.02	Ba	0.035602178578364	Nd	0.017602659311489	Cu	0.92461527303085	0.151865038874235	3509.21595174295
Al	0.02	Ba	0.035602178578364	Nd	0.017602659311489	Eu	0.92461527303085	0.18778457114497	2856.07771325681
Al	0.02	Ba	0.035602178578364	Nd	0.017602659311489	Fe	0.92461527303085	0.140821029488693	4750.90716672369
Al	0.02	Ba	0.035602178578364	Nd	0.017602659311489	Hf	0.92461527303085	0.224898165579603	2990.30022010921
Al	0.02	Ba	0.035602178578364	Nd	0.017602659311489	In	0.92461527303085	0.163965412427746	1326.98997317607
Al	0.02	Ba	0.035602178578364	Nd	0.017602659311489	K	0.92461527303085	0.102770050850273	2054.39863269836
Al	0.02	Ba	0.035602178578364	Nd	0.017602659311489	La	0.92461527303085	0.162957233292	2494.55036935198
Al	0.02	Ba	0.035602178578364	Nd	0.017602659311489	Li	0.92461527303085	0.109166984531988	5760.93957293936
Al	0.02	Ba	0.035602178578364	Nd	0.017602659311489	Mg	0.92461527303085	0.12450372430747	4465.50351432513
Al	0.02	Ba	0.035602178578364	Nd	0.017602659311489	Mn	0.92461527303085	0.137143399567786	4973.29962313815
Al	0.02	Ba	0.035602178578364	Nd	0.017602659311489	Mo	0.92461527303085	0.133420920501502	5937.00026760081
Al	0.02	Ba	0.035602178578364	Nd	0.017602659311489	Na	0.92461527303085	0.098159484574707	3166.36091477066
Al	0.02	Ba	0.035602178578364	Nd	0.017602659311489	Nd	0.92461527303085	0.175371365536102	2360.18826026824
Al	0.02	Ba	0.035602178578364	Nd	0.017602659311489	Ni	0.92461527303085	0.148191115494268	4806.5052808273
Al	0.02	Ba	0.035602178578364	Nd	0.017602659311489	Rb	0.92461527303085	0.108789843991318	1405.75396815619
Al	0.02	Ba	0.035602178578364	Nd	0.017602659311489	Pd	0.92461527303085	0.145245156754965	3045.89833421283
Al	0.02	Ba	0.035602178578364	Nd	0.017602659311489	Si	0.92461527303085	0.177191277137761	2239.72567971041
Al	0.02	Ba	0.035602178578364	Nd	0.017602659311489	Sm	0.92461527303085	0.183645291549956	2174.86121325619
Al	0.02	Ba	0.035602178578364	Nd	0.017602659311489	Sr	0.92461527303085	0.121597981537368	4374.90828884879
Al	0.02	Ba	0.035602178578364	Nd	0.017602659311489	Ti	0.92461527303085	0.126097258921203	4037.3980357273
Al	0.02	Ba	0.035602178578364	Nd	0.017602659311489	V	0.92461527303085	0.129776649449057	4426.5848344526
Al	0.02	Ba	0.035602178578364	Nd	0.017602659311489	W	0.92461527303085	0.233296631369048	4995.53886877959
Al	0.02	Ba	0.035602178578364	Nd	0.017602659311489	Y	0.92461527303085	0.124554318591304	3259.02443827669
Al	0.02	Ba	0.035602178578364	Nd	0.017602659311489	Yb	0.92461527303085	0.216746555416778	1674.47818632366
Al	0.02	Ba	0.035602178578364	Nd	0.017602659311489	Zn	0.92461527303085	0.155553232436822	3629.67853230079
Al	0.02	Ba	0.035602178578364	Nd	0.017602659311489	Zr	0.92461527303085	0.12751037765467	3722.34205580681
Al	0.02	Ba	0.035602178578364	Ni	0.017602659311489	Al	0.92461527303085	0.150334217868199	4973.54040494657
Al	0.02	Ba	0.035602178578364	Ni	0.017602659311489	Ba	0.92461527303085	0.158303836870858	1748.8497869369
Al	0.02	Ba	0.035602178578364	Ni	0.017602659311489	Bi	0.92461527303085	0.18026360932541	1906.37777689714
Al	0.02	Ba	0.035602178578364	Ni	0.017602659311489	Ca	0.92461527303085	0.118211388146077	3778.18095171885
Al	0.02	Ba	0.035602178578364	Ni	0.017602659311489	Ce	0.92461527303085	0.166579986809275	2193.63469976582
Al	0.02	Ba	0.035602178578364	Ni	0.017602659311489	Co	0.92461527303085	0.143994457580487	4621.41901562368
Al	0.02	Ba	0.035602178578364	Ni	0.017602659311489	Cs	0.92461527303085	0.154165391247555	2265.24318873512
Al	0.02	Ba	0.035602178578364	Ni	0.017602659311489	Cu	0.92461527303085	0.151347586161261	3555.78849530439
Al	0.02	Ba	0.035602178578364	Ni	0.017602659311489	Eu	0.92461527303085	0.187267118431995	2902.65025681825
Al	0.02	Ba	0.035602178578364	Ni	0.017602659311489	Fe	0.92461527303085	0.140303576775719	4797.47971028512
Al	0.02	Ba	0.035602178578364	Ni	0.017602659311489	Hf	0.92461527303085	0.224380712866628	3036.87276367065
Al	0.02	Ba	0.035602178578364	Ni	0.017602659311489	In	0.92461527303085	0.163447959714771	1373.5625167375
Al	0.02	Ba	0.035602178578364	Ni	0.017602659311489	K	0.92461527303085	0.102252598137298	2100.9711762598
Al	0.02	Ba	0.035602178578364	Ni	0.017602659311489	La	0.92461527303085	0.162439780579026	2541.12291291342
Al	0.02	Ba	0.035602178578364	Ni	0.017602659311489	Li	0.92461527303085	0.108649531819013	5807.5121165008
Al	0.02	Ba	0.035602178578364	Ni	0.017602659311489	Mg	0.92461527303085	0.123986271594496	4512.07605788657
Al	0.02	Ba	0.035602178578364	Ni	0.017602659311489	Mn	0.92461527303085	0.136625946854811	5019.87216669958
Al	0.02	Ba	0.035602178578364	Ni	0.017602659311489	Mo	0.92461527303085	0.132903467788527	5983.57281116224
Al	0.02	Ba	0.035602178578364	Ni	0.017602659311489	Na	0.92461527303085	0.097642031861733	3212.9334583321
Al	0.02	Ba	0.035602178578364	Ni	0.017602659311489	Nd	0.92461527303085	0.174853912823128	2406.76080382968
Al	0.02	Ba	0.035602178578364	Ni	0.017602659311489	Ni	0.92461527303085	0.147673662781294	4853.07782438874
Al	0.02	Ba	0.035602178578364	Ni	0.017602659311489	Rb	0.92461527303085	0.108272391278344	1452.32651171762
Al	0.02	Ba	0.035602178578364	Ni	0.017602659311489	Pd	0.92461527303085	0.14472770404199	3092.47087777426
Al	0.02	Ba	0.035602178578364	Ni	0.017602659311489	Si	0.92461527303085	0.176673824424786	2286.29822327185
Al	0.02	Ba	0.035602178578364	Ni	0.017602659311489	Sm	0.92461527303085	0.183127838836981	2221.43375681763
Al	0.02	Ba	0.035602178578364	Ni	0.017602659311489	Sr	0.92461527303085	0.121080528824394	4421.48083241023
Al	0.02	Ba	0.035602178578364	Ni	0.017602659311489	Ti	0.92461527303085	0.125579806208229	4083.97057928873
Al	0.02	Ba	0.035602178578364	Ni	0.017602659311489	V	0.92461527303085	0.129259196736082	4473.15737801404
Al	0.02	Ba	0.035602178578364	Ni	0.017602659311489	W	0.92461527303085	0.232779178656073	5042.11141234103
Al	0.02	Ba	0.035602178578364	Ni	0.017602659311489	Y	0.92461527303085	0.12403686587833	3305.59698183812
Al	0.02	Ba	0.035602178578364	Ni	0.017602659311489	Yb	0.92461527303085	0.216229102703803	1721.05072988509
Al	0.02	Ba	0.035602178578364	Ni	0.017602659311489	Zn	0.92461527303085	0.155035779723847	3676.25107586222
Al	0.02	Ba	0.035602178578364	Ni	0.017602659311489	Zr	0.92461527303085	0.126992924941696	3768.91459936825
Al	0.02	Ba	0.035602178578364	Rb	0.017602659311489	Al	0.92461527303085	0.149584103546128	4908.79751295018
Al	0.02	Ba	0.035602178578364	Rb	0.017602659311489	Ba	0.92461527303085	0.157553722548787	1684.10689494051
Al	0.02	Ba	0.035602178578364	Rb	0.017602659311489	Bi	0.92461527303085	0.179513495003339	1841.63488490075
Al	0.02	Ba	0.035602178578364	Rb	0.017602659311489	Ca	0.92461527303085	0.117461273824006	3713.43805972246
Al	0.02	Ba	0.035602178578364	Rb	0.017602659311489	Ce	0.92461527303085	0.165829872487204	2128.89180776943
Al	0.02	Ba	0.035602178578364	Rb	0.017602659311489	Co	0.92461527303085	0.143244343258416	4556.67612362729
Al	0.02	Ba	0.035602178578364	Rb	0.017602659311489	Cs	0.92461527303085	0.153415276925484	2200.50029673873
Al	0.02	Ba	0.035602178578364	Rb	0.017602659311489	Cu	0.92461527303085	0.15059747183919	3491.045603308
Al	0.02	Ba	0.035602178578364	Rb	0.017602659311489	Eu	0.92461527303085	0.186517004109924	2837.90736482186
Al	0.02	Ba	0.035602178578364	Rb	0.017602659311489	Fe	0.92461527303085	0.139553462453648	4732.73681828873
Al	0.02	Ba	0.035602178578364	Rb	0.017602659311489	Hf	0.92461527303085	0.223630598544557	2972.12987167426
Al	0.02	Ba	0.035602178578364	Rb	0.017602659311489	In	0.92461527303085	0.162697845392701	1308.81962474111
Al	0.02	Ba	0.035602178578364	Rb	0.017602659311489	K	0.92461527303085	0.101502483815228	2036.22828426341
Al	0.02	Ba	0.035602178578364	Rb	0.017602659311489	La	0.92461527303085	0.161689666256955	2476.38002091703
Al	0.02	Ba	0.035602178578364	Rb	0.017602659311489	Li	0.92461527303085	0.107899417496943	5742.76922450441
Al	0.02	Ba	0.035602178578364	Rb	0.017602659311489	Mg	0.92461527303085	0.123236157272425	4447.33316589018
Al	0.02	Ba	0.035602178578364	Rb	0.017602659311489	Mn	0.92461527303085	0.135875832532741	4955.12927470319
Al	0.02	Ba	0.035602178578364	Rb	0.017602659311489	Mo	0.92461527303085	0.132153353466457	5918.82991916585
Al	0.02	Ba	0.035602178578364	Rb	0.017602659311489	Na	0.92461527303085	0.096891917539662	3148.19056633571
Al	0.02	Ba	0.035602178578364	Rb	0.017602659311489	Nd	0.92461527303085	0.174103798501057	2342.01791183329
Al	0.02	Ba	0.035602178578364	Rb	0.017602659311489	Ni	0.92461527303085	0.146923548459223	4788.33493239235
Al	0.02	Ba	0.035602178578364	Rb	0.017602659311489	Rb	0.92461527303085	0.107522276956273	1387.58361972123
Al	0.02	Ba	0.035602178578364	Rb	0.017602659311489	Pd	0.92461527303085	0.143977589719919	3027.72798577787
Al	0.02	Ba	0.035602178578364	Rb	0.017602659311489	Si	0.92461527303085	0.175923710102715	2221.55533127546
Al	0.02	Ba	0.035602178578364	Rb	0.017602659311489	Sm	0.92461527303085	0.18237772451491	2156.69086482124
Al	0.02	Ba	0.035602178578364	Rb	0.017602659311489	Sr	0.92461527303085	0.120330414502323	4356.73794041384
Al	0.02	Ba	0.035602178578364	Rb	0.017602659311489	Ti	0.92461527303085	0.124829691886158	4019.22768729234
Al	0.02	Ba	0.035602178578364	Rb	0.017602659311489	V	0.92461527303085	0.128509082414012	4408.41448601765
Al	0.02	Ba	0.035602178578364	Rb	0.017602659311489	W	0.92461527303085	0.232029064334002	4977.36852034464
Al	0.02	Ba	0.035602178578364	Rb	0.017602659311489	Y	0.92461527303085	0.123286751556259	3240.85408984173
Al	0.02	Ba	0.035602178578364	Rb	0.017602659311489	Yb	0.92461527303085	0.215478988381732	1656.3078378887
Al	0.02	Ba	0.035602178578364	Rb	0.017602659311489	Zn	0.92461527303085	0.154285665401777	3611.50818386583
Al	0.02	Ba	0.035602178578364	Rb	0.017602659311489	Zr	0.92461527303085	0.126242810619625	3704.17170737186
Al	0.02	Ba	0.035602178578364	Pd	0.017602659311489	Al	0.92461527303085	0.150278133235437	4940.02228647433
Al	0.02	Ba	0.035602178578364	Pd	0.017602659311489	Ba	0.92461527303085	0.158247752238096	1715.33166846466
Al	0.02	Ba	0.035602178578364	Pd	0.017602659311489	Bi	0.92461527303085	0.180207524692648	1872.8596584249
Al	0.02	Ba	0.035602178578364	Pd	0.017602659311489	Ca	0.92461527303085	0.118155303513315	3744.6628332466
Al	0.02	Ba	0.035602178578364	Pd	0.017602659311489	Ce	0.92461527303085	0.166523902176513	2160.11658129358
Al	0.02	Ba	0.035602178578364	Pd	0.017602659311489	Co	0.92461527303085	0.143938372947725	4587.90089715143
Al	0.02	Ba	0.035602178578364	Pd	0.017602659311489	Cs	0.92461527303085	0.154109306614794	2231.72507026287
Al	0.02	Ba	0.035602178578364	Pd	0.017602659311489	Cu	0.92461527303085	0.151291501528499	3522.27037683214
Al	0.02	Ba	0.035602178578364	Pd	0.017602659311489	Eu	0.92461527303085	0.187211033799234	2869.132138346
Al	0.02	Ba	0.035602178578364	Pd	0.017602659311489	Fe	0.92461527303085	0.140247492142957	4763.96159181288
Al	0.02	Ba	0.035602178578364	Pd	0.017602659311489	Hf	0.92461527303085	0.224324628233867	3003.3546451984
Al	0.02	Ba	0.035602178578364	Pd	0.017602659311489	In	0.92461527303085	0.16339187508201	1340.04439826526
Al	0.02	Ba	0.035602178578364	Pd	0.017602659311489	K	0.92461527303085	0.102196513504537	2067.45305778755
Al	0.02	Ba	0.035602178578364	Pd	0.017602659311489	La	0.92461527303085	0.162383695946264	2507.60479444117
Al	0.02	Ba	0.035602178578364	Pd	0.017602659311489	Li	0.92461527303085	0.108593447186252	5773.99399802855
Al	0.02	Ba	0.035602178578364	Pd	0.017602659311489	Mg	0.92461527303085	0.123930186961734	4478.55793941432
Al	0.02	Ba	0.035602178578364	Pd	0.017602659311489	Mn	0.92461527303085	0.13656986222205	4986.35404822734
Al	0.02	Ba	0.035602178578364	Pd	0.017602659311489	Mo	0.92461527303085	0.132847383155766	5950.05469269
Al	0.02	Ba	0.035602178578364	Pd	0.017602659311489	Na	0.92461527303085	0.097585947228971	3179.41533985985
Al	0.02	Ba	0.035602178578364	Pd	0.017602659311489	Nd	0.92461527303085	0.174797828190366	2373.24268535743
Al	0.02	Ba	0.035602178578364	Pd	0.017602659311489	Ni	0.92461527303085	0.147617578148532	4819.55970591649
Al	0.02	Ba	0.035602178578364	Pd	0.017602659311489	Rb	0.92461527303085	0.108216306645582	1418.80839324538
Al	0.02	Ba	0.035602178578364	Pd	0.017602659311489	Pd	0.92461527303085	0.144671619409229	3058.95275930202
Al	0.02	Ba	0.035602178578364	Pd	0.017602659311489	Si	0.92461527303085	0.176617739792025	2252.7801047996
Al	0.02	Ba	0.035602178578364	Pd	0.017602659311489	Sm	0.92461527303085	0.183071754204219	2187.91563834538
Al	0.02	Ba	0.035602178578364	Pd	0.017602659311489	Sr	0.92461527303085	0.121024444191632	4387.96271393798
Al	0.02	Ba	0.035602178578364	Pd	0.017602659311489	Ti	0.92461527303085	0.125523721575467	4050.45246081649
Al	0.02	Ba	0.035602178578364	Pd	0.017602659311489	V	0.92461527303085	0.129203112103321	4439.63925954179
Al	0.02	Ba	0.035602178578364	Pd	0.017602659311489	W	0.92461527303085	0.232723094023312	5008.59329386878
Al	0.02	Ba	0.035602178578364	Pd	0.017602659311489	Y	0.92461527303085	0.123980781245568	3272.07886336588
Al	0.02	Ba	0.035602178578364	Pd	0.017602659311489	Yb	0.92461527303085	0.216173018071042	1687.53261141285
Al	0.02	Ba	0.035602178578364	Pd	0.017602659311489	Zn	0.92461527303085	0.154979695091086	3642.73295738998
Al	0.02	Ba	0.035602178578364	Pd	0.017602659311489	Zr	0.92461527303085	0.126936840308934	3735.396480896
Al	0.02	Ba	0.035602178578364	Si	0.017602659311489	Al	0.92461527303085	0.150886317731005	4924.67451643703
Al	0.02	Ba	0.035602178578364	Si	0.017602659311489	Ba	0.92461527303085	0.158855936733664	1699.98389842737
Al	0.02	Ba	0.035602178578364	Si	0.017602659311489	Bi	0.92461527303085	0.180815709188216	1857.51188838761
Al	0.02	Ba	0.035602178578364	Si	0.017602659311489	Ca	0.92461527303085	0.118763488008882	3729.31506320931
Al	0.02	Ba	0.035602178578364	Si	0.017602659311489	Ce	0.92461527303085	0.167132086672081	2144.76881125629
Al	0.02	Ba	0.035602178578364	Si	0.017602659311489	Co	0.92461527303085	0.144546557443293	4572.55312711414
Al	0.02	Ba	0.035602178578364	Si	0.017602659311489	Cs	0.92461527303085	0.154717491110361	2216.37730022558
Al	0.02	Ba	0.035602178578364	Si	0.017602659311489	Cu	0.92461527303085	0.151899686024066	3506.92260679485
Al	0.02	Ba	0.035602178578364	Si	0.017602659311489	Eu	0.92461527303085	0.187819218294801	2853.78436830871
Al	0.02	Ba	0.035602178578364	Si	0.017602659311489	Fe	0.92461527303085	0.140855676638524	4748.61382177559
Al	0.02	Ba	0.035602178578364	Si	0.017602659311489	Hf	0.92461527303085	0.224932812729434	2988.00687516111
Al	0.02	Ba	0.035602178578364	Si	0.017602659311489	In	0.92461527303085	0.164000059577577	1324.69662822796
Al	0.02	Ba	0.035602178578364	Si	0.017602659311489	K	0.92461527303085	0.102804698000104	2052.10528775026
Al	0.02	Ba	0.035602178578364	Si	0.017602659311489	La	0.92461527303085	0.162991880441832	2492.25702440388
Al	0.02	Ba	0.035602178578364	Si	0.017602659311489	Li	0.92461527303085	0.109201631681819	5758.64622799126
Al	0.02	Ba	0.035602178578364	Si	0.017602659311489	Mg	0.92461527303085	0.124538371457301	4463.21016937703
Al	0.02	Ba	0.035602178578364	Si	0.017602659311489	Mn	0.92461527303085	0.137178046717617	4971.00627819005
Al	0.02	Ba	0.035602178578364	Si	0.017602659311489	Mo	0.92461527303085	0.133455567651333	5934.70692265271
Al	0.02	Ba	0.035602178578364	Si	0.017602659311489	Na	0.92461527303085	0.098194131724539	3164.06756982256
Al	0.02	Ba	0.035602178578364	Si	0.017602659311489	Nd	0.92461527303085	0.175406012685934	2357.89491532014
Al	0.02	Ba	0.035602178578364	Si	0.017602659311489	Ni	0.92461527303085	0.1482257626441	4804.2119358792
Al	0.02	Ba	0.035602178578364	Si	0.017602659311489	Rb	0.92461527303085	0.10882449114115	1403.46062320809
Al	0.02	Ba	0.035602178578364	Si	0.017602659311489	Pd	0.92461527303085	0.145279803904796	3043.60498926473
Al	0.02	Ba	0.035602178578364	Si	0.017602659311489	Si	0.92461527303085	0.177225924287592	2237.43233476231
Al	0.02	Ba	0.035602178578364	Si	0.017602659311489	Sm	0.92461527303085	0.183679938699787	2172.56786830809
Al	0.02	Ba	0.035602178578364	Si	0.017602659311489	Sr	0.92461527303085	0.121632628687199	4372.61494390069
Al	0.02	Ba	0.035602178578364	Si	0.017602659311489	Ti	0.92461527303085	0.126131906071035	4035.10469077919
Al	0.02	Ba	0.035602178578364	Si	0.017602659311489	V	0.92461527303085	0.129811296598888	4424.2914895045
Al	0.02	Ba	0.035602178578364	Si	0.017602659311489	W	0.92461527303085	0.233331278518879	4993.24552383149
Al	0.02	Ba	0.035602178578364	Si	0.017602659311489	Y	0.92461527303085	0.124588965741136	3256.73109332858
Al	0.02	Ba	0.035602178578364	Si	0.017602659311489	Yb	0.92461527303085	0.216781202566609	1672.18484137556
Al	0.02	Ba	0.035602178578364	Si	0.017602659311489	Zn	0.92461527303085	0.155587879586653	3627.38518735268
Al	0.02	Ba	0.035602178578364	Si	0.017602659311489	Zr	0.92461527303085	0.127545024804501	3720.04871085871
Al	0.02	Ba	0.035602178578364	Sm	0.017602659311489	Al	0.92461527303085	0.151009188096878	4923.43963838806
Al	0.02	Ba	0.035602178578364	Sm	0.017602659311489	Ba	0.92461527303085	0.158978807099537	1698.74902037839
Al	0.02	Ba	0.035602178578364	Sm	0.017602659311489	Bi	0.92461527303085	0.180938579554089	1856.27701033863
Al	0.02	Ba	0.035602178578364	Sm	0.017602659311489	Ca	0.92461527303085	0.118886358374756	3728.08018516033
Al	0.02	Ba	0.035602178578364	Sm	0.017602659311489	Ce	0.92461527303085	0.167254957037954	2143.53393320731
Al	0.02	Ba	0.035602178578364	Sm	0.017602659311489	Co	0.92461527303085	0.144669427809166	4571.31824906516
Al	0.02	Ba	0.035602178578364	Sm	0.017602659311489	Cs	0.92461527303085	0.154840361476234	2215.1424221766
Al	0.02	Ba	0.035602178578364	Sm	0.017602659311489	Cu	0.92461527303085	0.15202255638994	3505.68772874587
Al	0.02	Ba	0.035602178578364	Sm	0.017602659311489	Eu	0.92461527303085	0.187942088660674	2852.54949025974
Al	0.02	Ba	0.035602178578364	Sm	0.017602659311489	Fe	0.92461527303085	0.140978547004398	4747.37894372661
Al	0.02	Ba	0.035602178578364	Sm	0.017602659311489	Hf	0.92461527303085	0.225055683095307	2986.77199711213
Al	0.02	Ba	0.035602178578364	Sm	0.017602659311489	In	0.92461527303085	0.164122929943451	1323.46175017899
Al	0.02	Ba	0.035602178578364	Sm	0.017602659311489	K	0.92461527303085	0.102927568365978	2050.87040970128
Al	0.02	Ba	0.035602178578364	Sm	0.017602659311489	La	0.92461527303085	0.163114750807705	2491.0221463549
Al	0.02	Ba	0.035602178578364	Sm	0.017602659311489	Li	0.92461527303085	0.109324502047692	5757.41134994228
Al	0.02	Ba	0.035602178578364	Sm	0.017602659311489	Mg	0.92461527303085	0.124661241823175	4461.97529132805
Al	0.02	Ba	0.035602178578364	Sm	0.017602659311489	Mn	0.92461527303085	0.137300917083491	4969.77140014107
Al	0.02	Ba	0.035602178578364	Sm	0.017602659311489	Mo	0.92461527303085	0.133578438017206	5933.47204460373
Al	0.02	Ba	0.035602178578364	Sm	0.017602659311489	Na	0.92461527303085	0.098317002090412	3162.83269177358
Al	0.02	Ba	0.035602178578364	Sm	0.017602659311489	Nd	0.92461527303085	0.175528883051807	2356.66003727116
Al	0.02	Ba	0.035602178578364	Sm	0.017602659311489	Ni	0.92461527303085	0.148348633009973	4802.97705783022
Al	0.02	Ba	0.035602178578364	Sm	0.017602659311489	Rb	0.92461527303085	0.108947361507023	1402.22574515911
Al	0.02	Ba	0.035602178578364	Sm	0.017602659311489	Pd	0.92461527303085	0.145402674270669	3042.37011121575
Al	0.02	Ba	0.035602178578364	Sm	0.017602659311489	Si	0.92461527303085	0.177348794653465	2236.19745671333
Al	0.02	Ba	0.035602178578364	Sm	0.017602659311489	Sm	0.92461527303085	0.18380280906566	2171.33299025911
Al	0.02	Ba	0.035602178578364	Sm	0.017602659311489	Sr	0.92461527303085	0.121755499053073	4371.38006585171
Al	0.02	Ba	0.035602178578364	Sm	0.017602659311489	Ti	0.92461527303085	0.126254776436908	4033.86981273022
Al	0.02	Ba	0.035602178578364	Sm	0.017602659311489	V	0.92461527303085	0.129934166964762	4423.05661145552
Al	0.02	Ba	0.035602178578364	Sm	0.017602659311489	W	0.92461527303085	0.233454148884752	4992.01064578252
Al	0.02	Ba	0.035602178578364	Sm	0.017602659311489	Y	0.92461527303085	0.124711836107009	3255.49621527961
Al	0.02	Ba	0.035602178578364	Sm	0.017602659311489	Yb	0.92461527303085	0.216904072932482	1670.94996332658
Al	0.02	Ba	0.035602178578364	Sm	0.017602659311489	Zn	0.92461527303085	0.155710749952527	3626.15030930371
Al	0.02	Ba	0.035602178578364	Sm	0.017602659311489	Zr	0.92461527303085	0.127667895170375	3718.81383280973
Al	0.02	Ba	0.035602178578364	Sr	0.017602659311489	Al	0.92461527303085	0.149827942565679	4965.32373901939
Al	0.02	Ba	0.035602178578364	Sr	0.017602659311489	Ba	0.92461527303085	0.157797561568338	1740.63312100972
Al	0.02	Ba	0.035602178578364	Sr	0.017602659311489	Bi	0.92461527303085	0.17975733402289	1898.16111096997
Al	0.02	Ba	0.035602178578364	Sr	0.017602659311489	Ca	0.92461527303085	0.117705112843557	3769.96428579167
Al	0.02	Ba	0.035602178578364	Sr	0.017602659311489	Ce	0.92461527303085	0.166073711506755	2185.41803383864
Al	0.02	Ba	0.035602178578364	Sr	0.017602659311489	Co	0.92461527303085	0.143488182277967	4613.2023496965
Al	0.02	Ba	0.035602178578364	Sr	0.017602659311489	Cs	0.92461527303085	0.153659115945036	2257.02652280794
Al	0.02	Ba	0.035602178578364	Sr	0.017602659311489	Cu	0.92461527303085	0.150841310858741	3547.57182937721
Al	0.02	Ba	0.035602178578364	Sr	0.017602659311489	Eu	0.92461527303085	0.186760843129475	2894.43359089107
Al	0.02	Ba	0.035602178578364	Sr	0.017602659311489	Fe	0.92461527303085	0.139797301473199	4789.26304435795
Al	0.02	Ba	0.035602178578364	Sr	0.017602659311489	Hf	0.92461527303085	0.223874437564108	3028.65609774347
Al	0.02	Ba	0.035602178578364	Sr	0.017602659311489	In	0.92461527303085	0.162941684412252	1365.34585081032
Al	0.02	Ba	0.035602178578364	Sr	0.017602659311489	K	0.92461527303085	0.101746322834779	2092.75451033262
Al	0.02	Ba	0.035602178578364	Sr	0.017602659311489	La	0.92461527303085	0.161933505276506	2532.90624698624
Al	0.02	Ba	0.035602178578364	Sr	0.017602659311489	Li	0.92461527303085	0.108143256516494	5799.29545057362
Al	0.02	Ba	0.035602178578364	Sr	0.017602659311489	Mg	0.92461527303085	0.123479996291976	4503.85939195939
Al	0.02	Ba	0.035602178578364	Sr	0.017602659311489	Mn	0.92461527303085	0.136119671552292	5011.65550077241
Al	0.02	Ba	0.035602178578364	Sr	0.017602659311489	Mo	0.92461527303085	0.132397192486008	5975.35614523506
Al	0.02	Ba	0.035602178578364	Sr	0.017602659311489	Na	0.92461527303085	0.097135756559213	3204.71679240492
Al	0.02	Ba	0.035602178578364	Sr	0.017602659311489	Nd	0.92461527303085	0.174347637520608	2398.5441379025
Al	0.02	Ba	0.035602178578364	Sr	0.017602659311489	Ni	0.92461527303085	0.147167387478774	4844.86115846156
Al	0.02	Ba	0.035602178578364	Sr	0.017602659311489	Rb	0.92461527303085	0.107766115975824	1444.10984579044
Al	0.02	Ba	0.035602178578364	Sr	0.017602659311489	Pd	0.92461527303085	0.14422142873947	3084.25421184709
Al	0.02	Ba	0.035602178578364	Sr	0.017602659311489	Si	0.92461527303085	0.176167549122267	2278.08155734467
Al	0.02	Ba	0.035602178578364	Sr	0.017602659311489	Sm	0.92461527303085	0.182621563534461	2213.21709089045
Al	0.02	Ba	0.035602178578364	Sr	0.017602659311489	Sr	0.92461527303085	0.120574253521874	4413.26416648305
Al	0.02	Ba	0.035602178578364	Sr	0.017602659311489	Ti	0.92461527303085	0.125073530905709	4075.75391336155
Al	0.02	Ba	0.035602178578364	Sr	0.017602659311489	V	0.92461527303085	0.128752921433563	4464.94071208686
Al	0.02	Ba	0.035602178578364	Sr	0.017602659311489	W	0.92461527303085	0.232272903353553	5033.89474641385
Al	0.02	Ba	0.035602178578364	Sr	0.017602659311489	Y	0.92461527303085	0.12353059057581	3297.38031591094
Al	0.02	Ba	0.035602178578364	Sr	0.017602659311489	Yb	0.92461527303085	0.215722827401283	1712.83406395792
Al	0.02	Ba	0.035602178578364	Sr	0.017602659311489	Zn	0.92461527303085	0.154529504421328	3668.03440993504
Al	0.02	Ba	0.035602178578364	Sr	0.017602659311489	Zr	0.92461527303085	0.126486649639176	3760.69793344107
Al	0.02	Ba	0.035602178578364	Ti	0.017602659311489	Al	0.92461527303085	0.149913598999491	4958.8982795087
Al	0.02	Ba	0.035602178578364	Ti	0.017602659311489	Ba	0.92461527303085	0.15788321800215	1734.20766149903
Al	0.02	Ba	0.035602178578364	Ti	0.017602659311489	Bi	0.92461527303085	0.179842990456702	1891.73565145927
Al	0.02	Ba	0.035602178578364	Ti	0.017602659311489	Ca	0.92461527303085	0.117790769277368	3763.53882628097
Al	0.02	Ba	0.035602178578364	Ti	0.017602659311489	Ce	0.92461527303085	0.166159367940567	2178.99257432795
Al	0.02	Ba	0.035602178578364	Ti	0.017602659311489	Co	0.92461527303085	0.143573838711779	4606.7768901858
Al	0.02	Ba	0.035602178578364	Ti	0.017602659311489	Cs	0.92461527303085	0.153744772378847	2250.60106329724
Al	0.02	Ba	0.035602178578364	Ti	0.017602659311489	Cu	0.92461527303085	0.150926967292552	3541.14636986651
Al	0.02	Ba	0.035602178578364	Ti	0.017602659311489	Eu	0.92461527303085	0.186846499563287	2888.00813138037
Al	0.02	Ba	0.035602178578364	Ti	0.017602659311489	Fe	0.92461527303085	0.13988295790701	4782.83758484725
Al	0.02	Ba	0.035602178578364	Ti	0.017602659311489	Hf	0.92461527303085	0.22396009399792	3022.23063823277
Al	0.02	Ba	0.035602178578364	Ti	0.017602659311489	In	0.92461527303085	0.163027340846063	1358.92039129963
Al	0.02	Ba	0.035602178578364	Ti	0.017602659311489	K	0.92461527303085	0.10183197926859	2086.32905082192
Al	0.02	Ba	0.035602178578364	Ti	0.017602659311489	La	0.92461527303085	0.162019161710318	2526.48078747554
Al	0.02	Ba	0.035602178578364	Ti	0.017602659311489	Li	0.92461527303085	0.108228912950305	5792.86999106292
Al	0.02	Ba	0.035602178578364	Ti	0.017602659311489	Mg	0.92461527303085	0.123565652725787	4497.43393244869
Al	0.02	Ba	0.035602178578364	Ti	0.017602659311489	Mn	0.92461527303085	0.136205327986103	5005.23004126171
Al	0.02	Ba	0.035602178578364	Ti	0.017602659311489	Mo	0.92461527303085	0.132482848919819	5968.93068572437
Al	0.02	Ba	0.035602178578364	Ti	0.017602659311489	Na	0.92461527303085	0.097221412993025	3198.29133289422
Al	0.02	Ba	0.035602178578364	Ti	0.017602659311489	Nd	0.92461527303085	0.17443329395442	2392.1186783918
Al	0.02	Ba	0.035602178578364	Ti	0.017602659311489	Ni	0.92461527303085	0.147253043912586	4838.43569895086
Al	0.02	Ba	0.035602178578364	Ti	0.017602659311489	Rb	0.92461527303085	0.107851772409636	1437.68438627975
Al	0.02	Ba	0.035602178578364	Ti	0.017602659311489	Pd	0.92461527303085	0.144307085173282	3077.82875233639
Al	0.02	Ba	0.035602178578364	Ti	0.017602659311489	Si	0.92461527303085	0.176253205556078	2271.65609783397
Al	0.02	Ba	0.035602178578364	Ti	0.017602659311489	Sm	0.92461527303085	0.182707219968273	2206.79163137975
Al	0.02	Ba	0.035602178578364	Ti	0.017602659311489	Sr	0.92461527303085	0.120659909955685	4406.83870697235
Al	0.02	Ba	0.035602178578364	Ti	0.017602659311489	Ti	0.92461527303085	0.125159187339521	4069.32845385086
Al	0.02	Ba	0.035602178578364	Ti	0.017602659311489	V	0.92461527303085	0.128838577867374	4458.51525257616
Al	0.02	Ba	0.035602178578364	Ti	0.017602659311489	W	0.92461527303085	0.232358559787365	5027.46928690315
Al	0.02	Ba	0.035602178578364	Ti	0.017602659311489	Y	0.92461527303085	0.123616247009622	3290.95485640024
Al	0.02	Ba	0.035602178578364	Ti	0.017602659311489	Yb	0.92461527303085	0.215808483835095	1706.40860444722
Al	0.02	Ba	0.035602178578364	Ti	0.017602659311489	Zn	0.92461527303085	0.154615160855139	3661.60895042435
Al	0.02	Ba	0.035602178578364	Ti	0.017602659311489	Zr	0.92461527303085	0.126572306072987	3754.27247393037
Al	0.02	Ba	0.035602178578364	V	0.017602659311489	Al	0.92461527303085	0.149983646574763	4966.30754780256
Al	0.02	Ba	0.035602178578364	V	0.017602659311489	Ba	0.92461527303085	0.157953265577422	1741.61692979289
Al	0.02	Ba	0.035602178578364	V	0.017602659311489	Bi	0.92461527303085	0.179913038031974	1899.14491975313
Al	0.02	Ba	0.035602178578364	V	0.017602659311489	Ca	0.92461527303085	0.117860816852641	3770.94809457484
Al	0.02	Ba	0.035602178578364	V	0.017602659311489	Ce	0.92461527303085	0.166229415515839	2186.40184262181
Al	0.02	Ba	0.035602178578364	V	0.017602659311489	Co	0.92461527303085	0.143643886287051	4614.18615847967
Al	0.02	Ba	0.035602178578364	V	0.017602659311489	Cs	0.92461527303085	0.15381481995412	2258.0103315911
Al	0.02	Ba	0.035602178578364	V	0.017602659311489	Cu	0.92461527303085	0.150997014867825	3548.55563816038
Al	0.02	Ba	0.035602178578364	V	0.017602659311489	Eu	0.92461527303085	0.186916547138559	2895.41739967424
Al	0.02	Ba	0.035602178578364	V	0.017602659311489	Fe	0.92461527303085	0.139953005482283	4790.24685314111
Al	0.02	Ba	0.035602178578364	V	0.017602659311489	Hf	0.92461527303085	0.224030141573192	3029.63990652664
Al	0.02	Ba	0.035602178578364	V	0.017602659311489	In	0.92461527303085	0.163097388421336	1366.32965959349
Al	0.02	Ba	0.035602178578364	V	0.017602659311489	K	0.92461527303085	0.101902026843863	2093.73831911579
Al	0.02	Ba	0.035602178578364	V	0.017602659311489	La	0.92461527303085	0.16208920928559	2533.8900557694
Al	0.02	Ba	0.035602178578364	V	0.017602659311489	Li	0.92461527303085	0.108298960525578	5800.27925935679
Al	0.02	Ba	0.035602178578364	V	0.017602659311489	Mg	0.92461527303085	0.12363570030106	4504.84320074256
Al	0.02	Ba	0.035602178578364	V	0.017602659311489	Mn	0.92461527303085	0.136275375561376	5012.63930955557
Al	0.02	Ba	0.035602178578364	V	0.017602659311489	Mo	0.92461527303085	0.132552896495092	5976.33995401823
Al	0.02	Ba	0.035602178578364	V	0.017602659311489	Na	0.92461527303085	0.097291460568297	3205.70060118809
Al	0.02	Ba	0.035602178578364	V	0.017602659311489	Nd	0.92461527303085	0.174503341529692	2399.52794668567
Al	0.02	Ba	0.035602178578364	V	0.017602659311489	Ni	0.92461527303085	0.147323091487858	4845.84496724473
Al	0.02	Ba	0.035602178578364	V	0.017602659311489	Rb	0.92461527303085	0.107921819984908	1445.09365457361
Al	0.02	Ba	0.035602178578364	V	0.017602659311489	Pd	0.92461527303085	0.144377132748555	3085.23802063025
Al	0.02	Ba	0.035602178578364	V	0.017602659311489	Si	0.92461527303085	0.176323253131351	2279.06536612784
Al	0.02	Ba	0.035602178578364	V	0.017602659311489	Sm	0.92461527303085	0.182777267543545	2214.20089967362
Al	0.02	Ba	0.035602178578364	V	0.017602659311489	Sr	0.92461527303085	0.120729957530958	4414.24797526622
Al	0.02	Ba	0.035602178578364	V	0.017602659311489	Ti	0.92461527303085	0.125229234914793	4076.73772214472
Al	0.02	Ba	0.035602178578364	V	0.017602659311489	V	0.92461527303085	0.128908625442647	4465.92452087003
Al	0.02	Ba	0.035602178578364	V	0.017602659311489	W	0.92461527303085	0.232428607362638	5034.87855519702
Al	0.02	Ba	0.035602178578364	V	0.017602659311489	Y	0.92461527303085	0.123686294584894	3298.36412469411
Al	0.02	Ba	0.035602178578364	V	0.017602659311489	Yb	0.92461527303085	0.215878531410367	1713.81787274108
Al	0.02	Ba	0.035602178578364	V	0.017602659311489	Zn	0.92461527303085	0.154685208430412	3669.01821871821
Al	0.02	Ba	0.035602178578364	V	0.017602659311489	Zr	0.92461527303085	0.12664235364826	3761.68174222423
Al	0.02	Ba	0.035602178578364	W	0.017602659311489	Al	0.92461527303085	0.151954441376471	4977.13919240359
Al	0.02	Ba	0.035602178578364	W	0.017602659311489	Ba	0.92461527303085	0.15992406037913	1752.44857439392
Al	0.02	Ba	0.035602178578364	W	0.017602659311489	Bi	0.92461527303085	0.181883832833682	1909.97656435416
Al	0.02	Ba	0.035602178578364	W	0.017602659311489	Ca	0.92461527303085	0.119831611654349	3781.77973917587
Al	0.02	Ba	0.035602178578364	W	0.017602659311489	Ce	0.92461527303085	0.168200210317547	2197.23348722284
Al	0.02	Ba	0.035602178578364	W	0.017602659311489	Co	0.92461527303085	0.145614681088759	4625.0178030807
Al	0.02	Ba	0.035602178578364	W	0.017602659311489	Cs	0.92461527303085	0.155785614755828	2268.84197619214
Al	0.02	Ba	0.035602178578364	W	0.017602659311489	Cu	0.92461527303085	0.152967809669533	3559.38728276141
Al	0.02	Ba	0.035602178578364	W	0.017602659311489	Eu	0.92461527303085	0.188887341940267	2906.24904427527
Al	0.02	Ba	0.035602178578364	W	0.017602659311489	Fe	0.92461527303085	0.141923800283991	4801.07849774214
Al	0.02	Ba	0.035602178578364	W	0.017602659311489	Hf	0.92461527303085	0.226000936374901	3040.47155112767
Al	0.02	Ba	0.035602178578364	W	0.017602659311489	In	0.92461527303085	0.165068183223044	1377.16130419452
Al	0.02	Ba	0.035602178578364	W	0.017602659311489	K	0.92461527303085	0.103872821645571	2104.56996371682
Al	0.02	Ba	0.035602178578364	W	0.017602659311489	La	0.92461527303085	0.164060004087298	2544.72170037043
Al	0.02	Ba	0.035602178578364	W	0.017602659311489	Li	0.92461527303085	0.110269755327286	5811.11090395781
Al	0.02	Ba	0.035602178578364	W	0.017602659311489	Mg	0.92461527303085	0.125606495102768	4515.67484534359
Al	0.02	Ba	0.035602178578364	W	0.017602659311489	Mn	0.92461527303085	0.138246170363084	5023.4709541566
Al	0.02	Ba	0.035602178578364	W	0.017602659311489	Mo	0.92461527303085	0.1345236912968	5987.17159861926
Al	0.02	Ba	0.035602178578364	W	0.017602659311489	Na	0.92461527303085	0.099262255370005	3216.53224578912
Al	0.02	Ba	0.035602178578364	W	0.017602659311489	Nd	0.92461527303085	0.1764741363314	2410.3595912867
Al	0.02	Ba	0.035602178578364	W	0.017602659311489	Ni	0.92461527303085	0.149293886289566	4856.67661184576
Al	0.02	Ba	0.035602178578364	W	0.017602659311489	Rb	0.92461527303085	0.109892614786616	1455.92529917464
Al	0.02	Ba	0.035602178578364	W	0.017602659311489	Pd	0.92461527303085	0.146347927550263	3096.06966523128
Al	0.02	Ba	0.035602178578364	W	0.017602659311489	Si	0.92461527303085	0.178294047933059	2289.89701072887
Al	0.02	Ba	0.035602178578364	W	0.017602659311489	Sm	0.92461527303085	0.184748062345253	2225.03254427465
Al	0.02	Ba	0.035602178578364	W	0.017602659311489	Sr	0.92461527303085	0.122700752332666	4425.07961986725
Al	0.02	Ba	0.035602178578364	W	0.017602659311489	Ti	0.92461527303085	0.127200029716501	4087.56936674575
Al	0.02	Ba	0.035602178578364	W	0.017602659311489	V	0.92461527303085	0.130879420244355	4476.75616547106
Al	0.02	Ba	0.035602178578364	W	0.017602659311489	W	0.92461527303085	0.234399402164346	5045.71019979805
Al	0.02	Ba	0.035602178578364	W	0.017602659311489	Y	0.92461527303085	0.125657089386602	3309.19576929514
Al	0.02	Ba	0.035602178578364	W	0.017602659311489	Yb	0.92461527303085	0.217849326212076	1724.64951734211
Al	0.02	Ba	0.035602178578364	W	0.017602659311489	Zn	0.92461527303085	0.15665600323212	3679.84986331924
Al	0.02	Ba	0.035602178578364	W	0.017602659311489	Zr	0.92461527303085	0.128613148449968	3772.51338682527
Al	0.02	Ba	0.035602178578364	Y	0.017602659311489	Al	0.92461527303085	0.149884224778928	4944.07974292097
Al	0.02	Ba	0.035602178578364	Y	0.017602659311489	Ba	0.92461527303085	0.157853843781588	1719.3891249113
Al	0.02	Ba	0.035602178578364	Y	0.017602659311489	Bi	0.92461527303085	0.179813616236139	1876.91711487154
Al	0.02	Ba	0.035602178578364	Y	0.017602659311489	Ca	0.92461527303085	0.117761395056806	3748.72028969324
Al	0.02	Ba	0.035602178578364	Y	0.017602659311489	Ce	0.92461527303085	0.166129993720005	2164.17403774022
Al	0.02	Ba	0.035602178578364	Y	0.017602659311489	Co	0.92461527303085	0.143544464491217	4591.95835359807
Al	0.02	Ba	0.035602178578364	Y	0.017602659311489	Cs	0.92461527303085	0.153715398158285	2235.78252670951
Al	0.02	Ba	0.035602178578364	Y	0.017602659311489	Cu	0.92461527303085	0.15089759307199	3526.32783327878
Al	0.02	Ba	0.035602178578364	Y	0.017602659311489	Eu	0.92461527303085	0.186817125342725	2873.18959479265
Al	0.02	Ba	0.035602178578364	Y	0.017602659311489	Fe	0.92461527303085	0.139853583686448	4768.01904825952
Al	0.02	Ba	0.035602178578364	Y	0.017602659311489	Hf	0.92461527303085	0.223930719777358	3007.41210164504
Al	0.02	Ba	0.035602178578364	Y	0.017602659311489	In	0.92461527303085	0.162997966625501	1344.1018547119
Al	0.02	Ba	0.035602178578364	Y	0.017602659311489	K	0.92461527303085	0.101802605048028	2071.51051423419
Al	0.02	Ba	0.035602178578364	Y	0.017602659311489	La	0.92461527303085	0.161989787489755	2511.66225088781
Al	0.02	Ba	0.035602178578364	Y	0.017602659311489	Li	0.92461527303085	0.108199538729743	5778.05145447519
Al	0.02	Ba	0.035602178578364	Y	0.017602659311489	Mg	0.92461527303085	0.123536278505225	4482.61539586096
Al	0.02	Ba	0.035602178578364	Y	0.017602659311489	Mn	0.92461527303085	0.136175953765541	4990.41150467398
Al	0.02	Ba	0.035602178578364	Y	0.017602659311489	Mo	0.92461527303085	0.132453474699257	5954.11214913664
Al	0.02	Ba	0.035602178578364	Y	0.017602659311489	Na	0.92461527303085	0.097192038772462	3183.47279630649
Al	0.02	Ba	0.035602178578364	Y	0.017602659311489	Nd	0.92461527303085	0.174403919733858	2377.30014180407
Al	0.02	Ba	0.035602178578364	Y	0.017602659311489	Ni	0.92461527303085	0.147223669692023	4823.61716236313
Al	0.02	Ba	0.035602178578364	Y	0.017602659311489	Rb	0.92461527303085	0.107822398189074	1422.86584969202
Al	0.02	Ba	0.035602178578364	Y	0.017602659311489	Pd	0.92461527303085	0.14427771095272	3063.01021574866
Al	0.02	Ba	0.035602178578364	Y	0.017602659311489	Si	0.92461527303085	0.176223831335516	2256.83756124624
Al	0.02	Ba	0.035602178578364	Y	0.017602659311489	Sm	0.92461527303085	0.182677845747711	2191.97309479202
Al	0.02	Ba	0.035602178578364	Y	0.017602659311489	Sr	0.92461527303085	0.120630535735123	4392.02017038462
Al	0.02	Ba	0.035602178578364	Y	0.017602659311489	Ti	0.92461527303085	0.125129813118958	4054.50991726313
Al	0.02	Ba	0.035602178578364	Y	0.017602659311489	V	0.92461527303085	0.128809203646812	4443.69671598843
Al	0.02	Ba	0.035602178578364	Y	0.017602659311489	W	0.92461527303085	0.232329185566803	5012.65075031543
Al	0.02	Ba	0.035602178578364	Y	0.017602659311489	Y	0.92461527303085	0.123586872789059	3276.13631981252
Al	0.02	Ba	0.035602178578364	Y	0.017602659311489	Yb	0.92461527303085	0.215779109614533	1691.59006785949
Al	0.02	Ba	0.035602178578364	Y	0.017602659311489	Zn	0.92461527303085	0.154585786634577	3646.79041383662
Al	0.02	Ba	0.035602178578364	Y	0.017602659311489	Zr	0.92461527303085	0.126542931852425	3739.45393734264
Al	0.02	Ba	0.035602178578364	Yb	0.017602659311489	Al	0.92461527303085	0.151639364006386	4913.91343629595
Al	0.02	Ba	0.035602178578364	Yb	0.017602659311489	Ba	0.92461527303085	0.159608983009045	1689.22281828628
Al	0.02	Ba	0.035602178578364	Yb	0.017602659311489	Bi	0.92461527303085	0.181568755463597	1846.75080824652
Al	0.02	Ba	0.035602178578364	Yb	0.017602659311489	Ca	0.92461527303085	0.119516534284264	3718.55398306822
Al	0.02	Ba	0.035602178578364	Yb	0.017602659311489	Ce	0.92461527303085	0.167885132947462	2134.0077311152
Al	0.02	Ba	0.035602178578364	Yb	0.017602659311489	Co	0.92461527303085	0.145299603718674	4561.79204697305
Al	0.02	Ba	0.035602178578364	Yb	0.017602659311489	Cs	0.92461527303085	0.155470537385743	2205.61622008449
Al	0.02	Ba	0.035602178578364	Yb	0.017602659311489	Cu	0.92461527303085	0.152652732299448	3496.16152665376
Al	0.02	Ba	0.035602178578364	Yb	0.017602659311489	Eu	0.92461527303085	0.188572264570182	2843.02328816762
Al	0.02	Ba	0.035602178578364	Yb	0.017602659311489	Fe	0.92461527303085	0.141608722913906	4737.8527416345
Al	0.02	Ba	0.035602178578364	Yb	0.017602659311489	Hf	0.92461527303085	0.225685859004815	2977.24579502002
Al	0.02	Ba	0.035602178578364	Yb	0.017602659311489	In	0.92461527303085	0.164753105852959	1313.93554808687
Al	0.02	Ba	0.035602178578364	Yb	0.017602659311489	K	0.92461527303085	0.103557744275486	2041.34420760917
Al	0.02	Ba	0.035602178578364	Yb	0.017602659311489	La	0.92461527303085	0.163744926717213	2481.49594426279
Al	0.02	Ba	0.035602178578364	Yb	0.017602659311489	Li	0.92461527303085	0.109954677957201	5747.88514785017
Al	0.02	Ba	0.035602178578364	Yb	0.017602659311489	Mg	0.92461527303085	0.125291417732683	4452.44908923594
Al	0.02	Ba	0.035602178578364	Yb	0.017602659311489	Mn	0.92461527303085	0.137931092992999	4960.24519804896
Al	0.02	Ba	0.035602178578364	Yb	0.017602659311489	Mo	0.92461527303085	0.134208613926715	5923.94584251162
Al	0.02	Ba	0.035602178578364	Yb	0.017602659311489	Na	0.92461527303085	0.09894717799992	3153.30648968147
Al	0.02	Ba	0.035602178578364	Yb	0.017602659311489	Nd	0.92461527303085	0.176159058961315	2347.13383517905
Al	0.02	Ba	0.035602178578364	Yb	0.017602659311489	Ni	0.92461527303085	0.148978808919481	4793.45085573811
Al	0.02	Ba	0.035602178578364	Yb	0.017602659311489	Rb	0.92461527303085	0.109577537416531	1392.699543067
Al	0.02	Ba	0.035602178578364	Yb	0.017602659311489	Pd	0.92461527303085	0.146032850180178	3032.84390912364
Al	0.02	Ba	0.035602178578364	Yb	0.017602659311489	Si	0.92461527303085	0.177978970562974	2226.67125462122
Al	0.02	Ba	0.035602178578364	Yb	0.017602659311489	Sm	0.92461527303085	0.184432984975168	2161.806788167
Al	0.02	Ba	0.035602178578364	Yb	0.017602659311489	Sr	0.92461527303085	0.122385674962581	4361.8538637596
Al	0.02	Ba	0.035602178578364	Yb	0.017602659311489	Ti	0.92461527303085	0.126884952346416	4024.34361063811
Al	0.02	Ba	0.035602178578364	Yb	0.017602659311489	V	0.92461527303085	0.13056434287427	4413.53040936341
Al	0.02	Ba	0.035602178578364	Yb	0.017602659311489	W	0.92461527303085	0.234084324794261	4982.4844436904
Al	0.02	Ba	0.035602178578364	Yb	0.017602659311489	Y	0.92461527303085	0.125342012016517	3245.9700131875
Al	0.02	Ba	0.035602178578364	Yb	0.017602659311489	Yb	0.92461527303085	0.21753424884199	1661.42376123447
Al	0.02	Ba	0.035602178578364	Yb	0.017602659311489	Zn	0.92461527303085	0.156340925862035	3616.62410721159
Al	0.02	Ba	0.035602178578364	Yb	0.017602659311489	Zr	0.92461527303085	0.128298071079883	3709.28763071762
Al	0.02	Ba	0.035602178578364	Zn	0.017602659311489	Al	0.92461527303085	0.150474376526758	4951.13618891512
Al	0.02	Ba	0.035602178578364	Zn	0.017602659311489	Ba	0.92461527303085	0.158443995529417	1726.44557090545
Al	0.02	Ba	0.035602178578364	Zn	0.017602659311489	Bi	0.92461527303085	0.180403767983969	1883.9735608657
Al	0.02	Ba	0.035602178578364	Zn	0.017602659311489	Ca	0.92461527303085	0.118351546804636	3755.7767356874
Al	0.02	Ba	0.035602178578364	Zn	0.017602659311489	Ce	0.92461527303085	0.166720145467834	2171.23048373437
Al	0.02	Ba	0.035602178578364	Zn	0.017602659311489	Co	0.92461527303085	0.144134616239046	4599.01479959223
Al	0.02	Ba	0.035602178578364	Zn	0.017602659311489	Cs	0.92461527303085	0.154305549906114	2242.83897270367
Al	0.02	Ba	0.035602178578364	Zn	0.017602659311489	Cu	0.92461527303085	0.15148774481982	3533.38427927294
Al	0.02	Ba	0.035602178578364	Zn	0.017602659311489	Eu	0.92461527303085	0.187407277090554	2880.2460407868
Al	0.02	Ba	0.035602178578364	Zn	0.017602659311489	Fe	0.92461527303085	0.140443735434278	4775.07549425368
Al	0.02	Ba	0.035602178578364	Zn	0.017602659311489	Hf	0.92461527303085	0.224520871525187	3014.4685476392
Al	0.02	Ba	0.035602178578364	Zn	0.017602659311489	In	0.92461527303085	0.16358811837333	1351.15830070605
Al	0.02	Ba	0.035602178578364	Zn	0.017602659311489	K	0.92461527303085	0.102392756795857	2078.56696022835
Al	0.02	Ba	0.035602178578364	Zn	0.017602659311489	La	0.92461527303085	0.162579939237585	2518.71869688197
Al	0.02	Ba	0.035602178578364	Zn	0.017602659311489	Li	0.92461527303085	0.108789690477572	5785.10790046935
Al	0.02	Ba	0.035602178578364	Zn	0.017602659311489	Mg	0.92461527303085	0.124126430253055	4489.67184185512
Al	0.02	Ba	0.035602178578364	Zn	0.017602659311489	Mn	0.92461527303085	0.13676610551337	4997.46795066814
Al	0.02	Ba	0.035602178578364	Zn	0.017602659311489	Mo	0.92461527303085	0.133043626447086	5961.16859513079
Al	0.02	Ba	0.035602178578364	Zn	0.017602659311489	Na	0.92461527303085	0.097782190520292	3190.52924230065
Al	0.02	Ba	0.035602178578364	Zn	0.017602659311489	Nd	0.92461527303085	0.174994071481687	2384.35658779823
Al	0.02	Ba	0.035602178578364	Zn	0.017602659311489	Ni	0.92461527303085	0.147813821439853	4830.67360835729
Al	0.02	Ba	0.035602178578364	Zn	0.017602659311489	Rb	0.92461527303085	0.108412549936903	1429.92229568617
Al	0.02	Ba	0.035602178578364	Zn	0.017602659311489	Pd	0.92461527303085	0.144867862700549	3070.06666174281
Al	0.02	Ba	0.035602178578364	Zn	0.017602659311489	Si	0.92461527303085	0.176813983083345	2263.8940072404
Al	0.02	Ba	0.035602178578364	Zn	0.017602659311489	Sm	0.92461527303085	0.18326799749554	2199.02954078618
Al	0.02	Ba	0.035602178578364	Zn	0.017602659311489	Sr	0.92461527303085	0.121220687482953	4399.07661637878
Al	0.02	Ba	0.035602178578364	Zn	0.017602659311489	Ti	0.92461527303085	0.125719964866788	4061.56636325728
Al	0.02	Ba	0.035602178578364	Zn	0.017602659311489	V	0.92461527303085	0.129399355394641	4450.75316198259
Al	0.02	Ba	0.035602178578364	Zn	0.017602659311489	W	0.92461527303085	0.232919337314632	5019.70719630958
Al	0.02	Ba	0.035602178578364	Zn	0.017602659311489	Y	0.92461527303085	0.124177024536889	3283.19276580667
Al	0.02	Ba	0.035602178578364	Zn	0.017602659311489	Yb	0.92461527303085	0.216369261362362	1698.64651385365
Al	0.02	Ba	0.035602178578364	Zn	0.017602659311489	Zn	0.92461527303085	0.155175938382406	3653.84685983077
Al	0.02	Ba	0.035602178578364	Zn	0.017602659311489	Zr	0.92461527303085	0.127133083600255	3746.5103833368
Al	0.02	Ba	0.035602178578364	Zr	0.017602659311489	Al	0.92461527303085	0.149940501699843	4952.90030041366
Al	0.02	Ba	0.035602178578364	Zr	0.017602659311489	Ba	0.92461527303085	0.157910120702502	1728.20968240399
Al	0.02	Ba	0.035602178578364	Zr	0.017602659311489	Bi	0.92461527303085	0.179869893157054	1885.73767236424
Al	0.02	Ba	0.035602178578364	Zr	0.017602659311489	Ca	0.92461527303085	0.117817671977721	3757.54084718594
Al	0.02	Ba	0.035602178578364	Zr	0.017602659311489	Ce	0.92461527303085	0.16618627064092	2172.99459523291
Al	0.02	Ba	0.035602178578364	Zr	0.017602659311489	Co	0.92461527303085	0.143600741412132	4600.77891109077
Al	0.02	Ba	0.035602178578364	Zr	0.017602659311489	Cs	0.92461527303085	0.1537716750792	2244.60308420221
Al	0.02	Ba	0.035602178578364	Zr	0.017602659311489	Cu	0.92461527303085	0.150953869992905	3535.14839077148
Al	0.02	Ba	0.035602178578364	Zr	0.017602659311489	Eu	0.92461527303085	0.18687340226364	2882.01015228534
Al	0.02	Ba	0.035602178578364	Zr	0.017602659311489	Fe	0.92461527303085	0.139909860607363	4776.83960575221
Al	0.02	Ba	0.035602178578364	Zr	0.017602659311489	Hf	0.92461527303085	0.223986996698273	3016.23265913774
Al	0.02	Ba	0.035602178578364	Zr	0.017602659311489	In	0.92461527303085	0.163054243546416	1352.92241220459
Al	0.02	Ba	0.035602178578364	Zr	0.017602659311489	K	0.92461527303085	0.101858881968943	2080.33107172689
Al	0.02	Ba	0.035602178578364	Zr	0.017602659311489	La	0.92461527303085	0.16204606441067	2520.48280838051
Al	0.02	Ba	0.035602178578364	Zr	0.017602659311489	Li	0.92461527303085	0.108255815650658	5786.87201196789
Al	0.02	Ba	0.035602178578364	Zr	0.017602659311489	Mg	0.92461527303085	0.12359255542614	4491.43595335366
Al	0.02	Ba	0.035602178578364	Zr	0.017602659311489	Mn	0.92461527303085	0.136232230686456	4999.23206216667
Al	0.02	Ba	0.035602178578364	Zr	0.017602659311489	Mo	0.92461527303085	0.132509751620172	5962.93270662933
Al	0.02	Ba	0.035602178578364	Zr	0.017602659311489	Na	0.92461527303085	0.097248315693377	3192.29335379919
Al	0.02	Ba	0.035602178578364	Zr	0.017602659311489	Nd	0.92461527303085	0.174460196654773	2386.12069929677
Al	0.02	Ba	0.035602178578364	Zr	0.017602659311489	Ni	0.92461527303085	0.147279946612938	4832.43771985583
Al	0.02	Ba	0.035602178578364	Zr	0.017602659311489	Rb	0.92461527303085	0.107878675109988	1431.68640718471
Al	0.02	Ba	0.035602178578364	Zr	0.017602659311489	Pd	0.92461527303085	0.144333987873635	3071.83077324135
Al	0.02	Ba	0.035602178578364	Zr	0.017602659311489	Si	0.92461527303085	0.176280108256431	2265.65811873894
Al	0.02	Ba	0.035602178578364	Zr	0.017602659311489	Sm	0.92461527303085	0.182734122668625	2200.79365228472
Al	0.02	Ba	0.035602178578364	Zr	0.017602659311489	Sr	0.92461527303085	0.120686812656038	4400.84072787732
Al	0.02	Ba	0.035602178578364	Zr	0.017602659311489	Ti	0.92461527303085	0.125186090039873	4063.33047475582
Al	0.02	Ba	0.035602178578364	Zr	0.017602659311489	V	0.92461527303085	0.128865480567727	4452.51727348113
Al	0.02	Ba	0.035602178578364	Zr	0.017602659311489	W	0.92461527303085	0.232385462487718	5021.47130780812
Al	0.02	Ba	0.035602178578364	Zr	0.017602659311489	Y	0.92461527303085	0.123643149709974	3284.95687730521
Al	0.02	Ba	0.035602178578364	Zr	0.017602659311489	Yb	0.92461527303085	0.215835386535448	1700.41062535219
Al	0.02	Ba	0.035602178578364	Zr	0.017602659311489	Zn	0.92461527303085	0.154642063555492	3655.61097132931
Al	0.02	Ba	0.035602178578364	Zr	0.017602659311489	Zr	0.92461527303085	0.12659920877334	3748.27449483534
Al	0.02	Bi	0.035602178578364	Ca	0.017602659311489	Al	0.92461527303085	0.150618878272584	4959.14230424107
Al	0.02	Bi	0.035602178578364	Ca	0.017602659311489	Ba	0.92461527303085	0.158588497275243	1734.45168623141
Al	0.02	Bi	0.035602178578364	Ca	0.017602659311489	Bi	0.92461527303085	0.180548269729795	1891.97967619165
Al	0.02	Bi	0.035602178578364	Ca	0.017602659311489	Ca	0.92461527303085	0.118496048550462	3763.78285101335
Al	0.02	Bi	0.035602178578364	Ca	0.017602659311489	Ce	0.92461527303085	0.166864647213661	2179.23659906033
Al	0.02	Bi	0.035602178578364	Ca	0.017602659311489	Co	0.92461527303085	0.144279117984872	4607.02091491818
Al	0.02	Bi	0.035602178578364	Ca	0.017602659311489	Cs	0.92461527303085	0.154450051651941	2250.84508802962
Al	0.02	Bi	0.035602178578364	Ca	0.017602659311489	Cu	0.92461527303085	0.151632246565646	3541.39039459889
Al	0.02	Bi	0.035602178578364	Ca	0.017602659311489	Eu	0.92461527303085	0.187551778836381	2888.25215611275
Al	0.02	Bi	0.035602178578364	Ca	0.017602659311489	Fe	0.92461527303085	0.140588237180104	4783.08160957963
Al	0.02	Bi	0.035602178578364	Ca	0.017602659311489	Hf	0.92461527303085	0.224665373271014	3022.47466296515
Al	0.02	Bi	0.035602178578364	Ca	0.017602659311489	In	0.92461527303085	0.163732620119157	1359.164416032
Al	0.02	Bi	0.035602178578364	Ca	0.017602659311489	K	0.92461527303085	0.102537258541684	2086.5730755543
Al	0.02	Bi	0.035602178578364	Ca	0.017602659311489	La	0.92461527303085	0.162724440983411	2526.72481220792
Al	0.02	Bi	0.035602178578364	Ca	0.017602659311489	Li	0.92461527303085	0.108934192223399	5793.1140157953
Al	0.02	Bi	0.035602178578364	Ca	0.017602659311489	Mg	0.92461527303085	0.124270931998881	4497.67795718107
Al	0.02	Bi	0.035602178578364	Ca	0.017602659311489	Mn	0.92461527303085	0.136910607259197	5005.47406599409
Al	0.02	Bi	0.035602178578364	Ca	0.017602659311489	Mo	0.92461527303085	0.133188128192913	5969.17471045675
Al	0.02	Bi	0.035602178578364	Ca	0.017602659311489	Na	0.92461527303085	0.097926692266118	3198.5353576266
Al	0.02	Bi	0.035602178578364	Ca	0.017602659311489	Nd	0.92461527303085	0.175138573227513	2392.36270312418
Al	0.02	Bi	0.035602178578364	Ca	0.017602659311489	Ni	0.92461527303085	0.147958323185679	4838.67972368324
Al	0.02	Bi	0.035602178578364	Ca	0.017602659311489	Rb	0.92461527303085	0.108557051682729	1437.92841101213
Al	0.02	Bi	0.035602178578364	Ca	0.017602659311489	Pd	0.92461527303085	0.145012364446376	3078.07277706877
Al	0.02	Bi	0.035602178578364	Ca	0.017602659311489	Si	0.92461527303085	0.176958484829172	2271.90012256635
Al	0.02	Bi	0.035602178578364	Ca	0.017602659311489	Sm	0.92461527303085	0.183412499241366	2207.03565611213
Al	0.02	Bi	0.035602178578364	Ca	0.017602659311489	Sr	0.92461527303085	0.121365189228779	4407.08273170473
Al	0.02	Bi	0.035602178578364	Ca	0.017602659311489	Ti	0.92461527303085	0.125864466612614	4069.57247858324
Al	0.02	Bi	0.035602178578364	Ca	0.017602659311489	V	0.92461527303085	0.129543857140468	4458.75927730854
Al	0.02	Bi	0.035602178578364	Ca	0.017602659311489	W	0.92461527303085	0.233063839060459	5027.71331163553
Al	0.02	Bi	0.035602178578364	Ca	0.017602659311489	Y	0.92461527303085	0.124321526282715	3291.19888113263
Al	0.02	Bi	0.035602178578364	Ca	0.017602659311489	Yb	0.92461527303085	0.216513763108189	1706.6526291796
Al	0.02	Bi	0.035602178578364	Ca	0.017602659311489	Zn	0.92461527303085	0.155320440128233	3661.85297515672
Al	0.02	Bi	0.035602178578364	Ca	0.017602659311489	Zr	0.92461527303085	0.127277585346081	3754.51649866275
Al	0.02	Bi	0.035602178578364	Ce	0.017602659311489	Al	0.92461527303085	0.151539710956703	4928.97599761605
Al	0.02	Bi	0.035602178578364	Ce	0.017602659311489	Ba	0.92461527303085	0.159509329959362	1704.28537960639
Al	0.02	Bi	0.035602178578364	Ce	0.017602659311489	Bi	0.92461527303085	0.181469102413914	1861.81336956663
Al	0.02	Bi	0.035602178578364	Ce	0.017602659311489	Ca	0.92461527303085	0.119416881234581	3733.61654438833
Al	0.02	Bi	0.035602178578364	Ce	0.017602659311489	Ce	0.92461527303085	0.16778547989778	2149.0702924353
Al	0.02	Bi	0.035602178578364	Ce	0.017602659311489	Co	0.92461527303085	0.145199950668991	4576.85460829316
Al	0.02	Bi	0.035602178578364	Ce	0.017602659311489	Cs	0.92461527303085	0.15537088433606	2220.6787814046
Al	0.02	Bi	0.035602178578364	Ce	0.017602659311489	Cu	0.92461527303085	0.152553079249765	3511.22408797387
Al	0.02	Bi	0.035602178578364	Ce	0.017602659311489	Eu	0.92461527303085	0.1884726115205	2858.08584948773
Al	0.02	Bi	0.035602178578364	Ce	0.017602659311489	Fe	0.92461527303085	0.141509069864223	4752.91530295461
Al	0.02	Bi	0.035602178578364	Ce	0.017602659311489	Hf	0.92461527303085	0.225586205955133	2992.30835634013
Al	0.02	Bi	0.035602178578364	Ce	0.017602659311489	In	0.92461527303085	0.164653452803276	1328.99810940698
Al	0.02	Bi	0.035602178578364	Ce	0.017602659311489	K	0.92461527303085	0.103458091225803	2056.40676892928
Al	0.02	Bi	0.035602178578364	Ce	0.017602659311489	La	0.92461527303085	0.16364527366753	2496.5585055829
Al	0.02	Bi	0.035602178578364	Ce	0.017602659311489	Li	0.92461527303085	0.109855024907518	5762.94770917028
Al	0.02	Bi	0.035602178578364	Ce	0.017602659311489	Mg	0.92461527303085	0.125191764683	4467.51165055605
Al	0.02	Bi	0.035602178578364	Ce	0.017602659311489	Mn	0.92461527303085	0.137831439943316	4975.30775936907
Al	0.02	Bi	0.035602178578364	Ce	0.017602659311489	Mo	0.92461527303085	0.134108960877032	5939.00840383173
Al	0.02	Bi	0.035602178578364	Ce	0.017602659311489	Na	0.92461527303085	0.098847524950237	3168.36905100158
Al	0.02	Bi	0.035602178578364	Ce	0.017602659311489	Nd	0.92461527303085	0.176059405911632	2362.19639649916
Al	0.02	Bi	0.035602178578364	Ce	0.017602659311489	Ni	0.92461527303085	0.148879155869798	4808.51341705822
Al	0.02	Bi	0.035602178578364	Ce	0.017602659311489	Rb	0.92461527303085	0.109477884366848	1407.76210438711
Al	0.02	Bi	0.035602178578364	Ce	0.017602659311489	Pd	0.92461527303085	0.145933197130495	3047.90647044375
Al	0.02	Bi	0.035602178578364	Ce	0.017602659311489	Si	0.92461527303085	0.177879317513291	2241.73381594133
Al	0.02	Bi	0.035602178578364	Ce	0.017602659311489	Sm	0.92461527303085	0.184333331925485	2176.86934948711
Al	0.02	Bi	0.035602178578364	Ce	0.017602659311489	Sr	0.92461527303085	0.122286021912898	4376.91642507971
Al	0.02	Bi	0.035602178578364	Ce	0.017602659311489	Ti	0.92461527303085	0.126785299296733	4039.40617195821
Al	0.02	Bi	0.035602178578364	Ce	0.017602659311489	V	0.92461527303085	0.130464689824587	4428.59297068352
Al	0.02	Bi	0.035602178578364	Ce	0.017602659311489	W	0.92461527303085	0.233984671744578	4997.54700501051
Al	0.02	Bi	0.035602178578364	Ce	0.017602659311489	Y	0.92461527303085	0.125242358966834	3261.0325745076
Al	0.02	Bi	0.035602178578364	Ce	0.017602659311489	Yb	0.92461527303085	0.217434595792308	1676.48632255458
Al	0.02	Bi	0.035602178578364	Ce	0.017602659311489	Zn	0.92461527303085	0.156241272812352	3631.6866685317
Al	0.02	Bi	0.035602178578364	Ce	0.017602659311489	Zr	0.92461527303085	0.1281984180302	3724.35019203773
Al	0.02	Bi	0.035602178578364	Co	0.017602659311489	Al	0.92461527303085	0.151109731712384	4975.19571887778
Al	0.02	Bi	0.035602178578364	Co	0.017602659311489	Ba	0.92461527303085	0.159079350715043	1750.50510086811
Al	0.02	Bi	0.035602178578364	Co	0.017602659311489	Bi	0.92461527303085	0.181039123169595	1908.03309082836
Al	0.02	Bi	0.035602178578364	Co	0.017602659311489	Ca	0.92461527303085	0.118986901990262	3779.83626565006
Al	0.02	Bi	0.035602178578364	Co	0.017602659311489	Ce	0.92461527303085	0.16735550065346	2195.29001369703
Al	0.02	Bi	0.035602178578364	Co	0.017602659311489	Co	0.92461527303085	0.144769971424672	4623.07432955489
Al	0.02	Bi	0.035602178578364	Co	0.017602659311489	Cs	0.92461527303085	0.15494090509174	2266.89850266633
Al	0.02	Bi	0.035602178578364	Co	0.017602659311489	Cu	0.92461527303085	0.152123100005446	3557.4438092356
Al	0.02	Bi	0.035602178578364	Co	0.017602659311489	Eu	0.92461527303085	0.18804263227618	2904.30557074946
Al	0.02	Bi	0.035602178578364	Co	0.017602659311489	Fe	0.92461527303085	0.141079090619904	4799.13502421633
Al	0.02	Bi	0.035602178578364	Co	0.017602659311489	Hf	0.92461527303085	0.225156226710813	3038.52807760186
Al	0.02	Bi	0.035602178578364	Co	0.017602659311489	In	0.92461527303085	0.164223473558956	1375.21783066871
Al	0.02	Bi	0.035602178578364	Co	0.017602659311489	K	0.92461527303085	0.103028111981484	2102.62649019101
Al	0.02	Bi	0.035602178578364	Co	0.017602659311489	La	0.92461527303085	0.163215294423211	2542.77822684463
Al	0.02	Bi	0.035602178578364	Co	0.017602659311489	Li	0.92461527303085	0.109425045663198	5809.16743043201
Al	0.02	Bi	0.035602178578364	Co	0.017602659311489	Mg	0.92461527303085	0.124761785438681	4513.73137181778
Al	0.02	Bi	0.035602178578364	Co	0.017602659311489	Mn	0.92461527303085	0.137401460698996	5021.52748063079
Al	0.02	Bi	0.035602178578364	Co	0.017602659311489	Mo	0.92461527303085	0.133678981632712	5985.22812509345
Al	0.02	Bi	0.035602178578364	Co	0.017602659311489	Na	0.92461527303085	0.098417545705918	3214.58877226331
Al	0.02	Bi	0.035602178578364	Co	0.017602659311489	Nd	0.92461527303085	0.175629426667313	2408.41611776089
Al	0.02	Bi	0.035602178578364	Co	0.017602659311489	Ni	0.92461527303085	0.148449176625479	4854.73313831995
Al	0.02	Bi	0.035602178578364	Co	0.017602659311489	Rb	0.92461527303085	0.109047905122529	1453.98182564883
Al	0.02	Bi	0.035602178578364	Co	0.017602659311489	Pd	0.92461527303085	0.145503217886175	3094.12619170547
Al	0.02	Bi	0.035602178578364	Co	0.017602659311489	Si	0.92461527303085	0.177449338268971	2287.95353720306
Al	0.02	Bi	0.035602178578364	Co	0.017602659311489	Sm	0.92461527303085	0.183903352681166	2223.08907074884
Al	0.02	Bi	0.035602178578364	Co	0.017602659311489	Sr	0.92461527303085	0.121856042668579	4423.13614634144
Al	0.02	Bi	0.035602178578364	Co	0.017602659311489	Ti	0.92461527303085	0.126355320052414	4085.62589321994
Al	0.02	Bi	0.035602178578364	Co	0.017602659311489	V	0.92461527303085	0.130034710580267	4474.81269194525
Al	0.02	Bi	0.035602178578364	Co	0.017602659311489	W	0.92461527303085	0.233554692500258	5043.76672627224
Al	0.02	Bi	0.035602178578364	Co	0.017602659311489	Y	0.92461527303085	0.124812379722515	3307.25229576933
Al	0.02	Bi	0.035602178578364	Co	0.017602659311489	Yb	0.92461527303085	0.217004616547988	1722.70604381631
Al	0.02	Bi	0.035602178578364	Co	0.017602659311489	Zn	0.92461527303085	0.155811293568032	3677.90638979343
Al	0.02	Bi	0.035602178578364	Co	0.017602659311489	Zr	0.92461527303085	0.127768438785881	3770.56991329946
Al	0.02	Bi	0.035602178578364	Cs	0.017602659311489	Al	0.92461527303085	0.151303364118686	4930.33926715302
Al	0.02	Bi	0.035602178578364	Cs	0.017602659311489	Ba	0.92461527303085	0.159272983121346	1705.64864914335
Al	0.02	Bi	0.035602178578364	Cs	0.017602659311489	Bi	0.92461527303085	0.181232755575897	1863.17663910359
Al	0.02	Bi	0.035602178578364	Cs	0.017602659311489	Ca	0.92461527303085	0.119180534396564	3734.9798139253
Al	0.02	Bi	0.035602178578364	Cs	0.017602659311489	Ce	0.92461527303085	0.167549133059763	2150.43356197227
Al	0.02	Bi	0.035602178578364	Cs	0.017602659311489	Co	0.92461527303085	0.144963603830975	4578.21787783013
Al	0.02	Bi	0.035602178578364	Cs	0.017602659311489	Cs	0.92461527303085	0.155134537498043	2222.04205094157
Al	0.02	Bi	0.035602178578364	Cs	0.017602659311489	Cu	0.92461527303085	0.152316732411748	3512.58735751084
Al	0.02	Bi	0.035602178578364	Cs	0.017602659311489	Eu	0.92461527303085	0.188236264682483	2859.4491190247
Al	0.02	Bi	0.035602178578364	Cs	0.017602659311489	Fe	0.92461527303085	0.141272723026206	4754.27857249157
Al	0.02	Bi	0.035602178578364	Cs	0.017602659311489	Hf	0.92461527303085	0.225349859117116	2993.6716258771
Al	0.02	Bi	0.035602178578364	Cs	0.017602659311489	In	0.92461527303085	0.164417105965259	1330.36137894395
Al	0.02	Bi	0.035602178578364	Cs	0.017602659311489	K	0.92461527303085	0.103221744387786	2057.77003846625
Al	0.02	Bi	0.035602178578364	Cs	0.017602659311489	La	0.92461527303085	0.163408926829514	2497.92177511987
Al	0.02	Bi	0.035602178578364	Cs	0.017602659311489	Li	0.92461527303085	0.109618678069501	5764.31097870724
Al	0.02	Bi	0.035602178578364	Cs	0.017602659311489	Mg	0.92461527303085	0.124955417844983	4468.87492009302
Al	0.02	Bi	0.035602178578364	Cs	0.017602659311489	Mn	0.92461527303085	0.137595093105299	4976.67102890603
Al	0.02	Bi	0.035602178578364	Cs	0.017602659311489	Mo	0.92461527303085	0.133872614039015	5940.37167336869
Al	0.02	Bi	0.035602178578364	Cs	0.017602659311489	Na	0.92461527303085	0.09861117811222	3169.73232053855
Al	0.02	Bi	0.035602178578364	Cs	0.017602659311489	Nd	0.92461527303085	0.175823059073616	2363.55966603613
Al	0.02	Bi	0.035602178578364	Cs	0.017602659311489	Ni	0.92461527303085	0.148642809031781	4809.87668659519
Al	0.02	Bi	0.035602178578364	Cs	0.017602659311489	Rb	0.92461527303085	0.109241537528832	1409.12537392407
Al	0.02	Bi	0.035602178578364	Cs	0.017602659311489	Pd	0.92461527303085	0.145696850292478	3049.26973998071
Al	0.02	Bi	0.035602178578364	Cs	0.017602659311489	Si	0.92461527303085	0.177642970675274	2243.0970854783
Al	0.02	Bi	0.035602178578364	Cs	0.017602659311489	Sm	0.92461527303085	0.184096985087469	2178.23261902408
Al	0.02	Bi	0.035602178578364	Cs	0.017602659311489	Sr	0.92461527303085	0.122049675074881	4378.27969461668
Al	0.02	Bi	0.035602178578364	Cs	0.017602659311489	Ti	0.92461527303085	0.126548952458716	4040.76944149518
Al	0.02	Bi	0.035602178578364	Cs	0.017602659311489	V	0.92461527303085	0.13022834298657	4429.95624022049
Al	0.02	Bi	0.035602178578364	Cs	0.017602659311489	W	0.92461527303085	0.233748324906561	4998.91027454748
Al	0.02	Bi	0.035602178578364	Cs	0.017602659311489	Y	0.92461527303085	0.125006012128818	3262.39584404457
Al	0.02	Bi	0.035602178578364	Cs	0.017602659311489	Yb	0.92461527303085	0.217198248954291	1677.84959209154
Al	0.02	Bi	0.035602178578364	Cs	0.017602659311489	Zn	0.92461527303085	0.156004925974335	3633.04993806867
Al	0.02	Bi	0.035602178578364	Cs	0.017602659311489	Zr	0.92461527303085	0.127962071192183	3725.7134615747
Al	0.02	Bi	0.035602178578364	Cu	0.017602659311489	Al	0.92461527303085	0.151249719252127	4954.90843664458
Al	0.02	Bi	0.035602178578364	Cu	0.017602659311489	Ba	0.92461527303085	0.159219338254787	1730.21781863491
Al	0.02	Bi	0.035602178578364	Cu	0.017602659311489	Bi	0.92461527303085	0.181179110709338	1887.74580859515
Al	0.02	Bi	0.035602178578364	Cu	0.017602659311489	Ca	0.92461527303085	0.119126889530005	3759.54898341686
Al	0.02	Bi	0.035602178578364	Cu	0.017602659311489	Ce	0.92461527303085	0.167495488193204	2175.00273146383
Al	0.02	Bi	0.035602178578364	Cu	0.017602659311489	Co	0.92461527303085	0.144909958964416	4602.78704732169
Al	0.02	Bi	0.035602178578364	Cu	0.017602659311489	Cs	0.92461527303085	0.155080892631484	2246.61122043313
Al	0.02	Bi	0.035602178578364	Cu	0.017602659311489	Cu	0.92461527303085	0.152263087545189	3537.1565270024
Al	0.02	Bi	0.035602178578364	Cu	0.017602659311489	Eu	0.92461527303085	0.188182619815924	2884.01828851626
Al	0.02	Bi	0.035602178578364	Cu	0.017602659311489	Fe	0.92461527303085	0.141219078159647	4778.84774198313
Al	0.02	Bi	0.035602178578364	Cu	0.017602659311489	Hf	0.92461527303085	0.225296214250557	3018.24079536866
Al	0.02	Bi	0.035602178578364	Cu	0.017602659311489	In	0.92461527303085	0.1643634610987	1354.93054843551
Al	0.02	Bi	0.035602178578364	Cu	0.017602659311489	K	0.92461527303085	0.103168099521227	2082.33920795781
Al	0.02	Bi	0.035602178578364	Cu	0.017602659311489	La	0.92461527303085	0.163355281962954	2522.49094461142
Al	0.02	Bi	0.035602178578364	Cu	0.017602659311489	Li	0.92461527303085	0.109565033202942	5788.88014819881
Al	0.02	Bi	0.035602178578364	Cu	0.017602659311489	Mg	0.92461527303085	0.124901772978424	4493.44408958458
Al	0.02	Bi	0.035602178578364	Cu	0.017602659311489	Mn	0.92461527303085	0.13754144823874	5001.24019839759
Al	0.02	Bi	0.035602178578364	Cu	0.017602659311489	Mo	0.92461527303085	0.133818969172456	5964.94084286025
Al	0.02	Bi	0.035602178578364	Cu	0.017602659311489	Na	0.92461527303085	0.098557533245661	3194.30149003011
Al	0.02	Bi	0.035602178578364	Cu	0.017602659311489	Nd	0.92461527303085	0.175769414207057	2388.12883552769
Al	0.02	Bi	0.035602178578364	Cu	0.017602659311489	Ni	0.92461527303085	0.148589164165222	4834.44585608675
Al	0.02	Bi	0.035602178578364	Cu	0.017602659311489	Rb	0.92461527303085	0.109187892662272	1433.69454341563
Al	0.02	Bi	0.035602178578364	Cu	0.017602659311489	Pd	0.92461527303085	0.145643205425919	3073.83890947227
Al	0.02	Bi	0.035602178578364	Cu	0.017602659311489	Si	0.92461527303085	0.177589325808715	2267.66625496986
Al	0.02	Bi	0.035602178578364	Cu	0.017602659311489	Sm	0.92461527303085	0.18404334022091	2202.80178851564
Al	0.02	Bi	0.035602178578364	Cu	0.017602659311489	Sr	0.92461527303085	0.121996030208322	4402.84886410824
Al	0.02	Bi	0.035602178578364	Cu	0.017602659311489	Ti	0.92461527303085	0.126495307592157	4065.33861098674
Al	0.02	Bi	0.035602178578364	Cu	0.017602659311489	V	0.92461527303085	0.130174698120011	4454.52540971205
Al	0.02	Bi	0.035602178578364	Cu	0.017602659311489	W	0.92461527303085	0.233694680040002	5023.47944403904
Al	0.02	Bi	0.035602178578364	Cu	0.017602659311489	Y	0.92461527303085	0.124952367262259	3286.96501353613
Al	0.02	Bi	0.035602178578364	Cu	0.017602659311489	Yb	0.92461527303085	0.217144604087732	1702.4187615831
Al	0.02	Bi	0.035602178578364	Cu	0.017602659311489	Zn	0.92461527303085	0.155951281107776	3657.61910756023
Al	0.02	Bi	0.035602178578364	Cu	0.017602659311489	Zr	0.92461527303085	0.127908426325624	3750.28263106626
Al	0.02	Bi	0.035602178578364	Eu	0.017602659311489	Al	0.92461527303085	0.151933548848752	4942.47410830206
Al	0.02	Bi	0.035602178578364	Eu	0.017602659311489	Ba	0.92461527303085	0.159903167851411	1717.78349029239
Al	0.02	Bi	0.035602178578364	Eu	0.017602659311489	Bi	0.92461527303085	0.181862940305963	1875.31148025263
Al	0.02	Bi	0.035602178578364	Eu	0.017602659311489	Ca	0.92461527303085	0.11981071912663	3747.11465507433
Al	0.02	Bi	0.035602178578364	Eu	0.017602659311489	Ce	0.92461527303085	0.168179317789828	2162.56840312131
Al	0.02	Bi	0.035602178578364	Eu	0.017602659311489	Co	0.92461527303085	0.14559378856104	4590.35271897916
Al	0.02	Bi	0.035602178578364	Eu	0.017602659311489	Cs	0.92461527303085	0.155764722228109	2234.1768920906
Al	0.02	Bi	0.035602178578364	Eu	0.017602659311489	Cu	0.92461527303085	0.152946917141814	3524.72219865988
Al	0.02	Bi	0.035602178578364	Eu	0.017602659311489	Eu	0.92461527303085	0.188866449412548	2871.58396017374
Al	0.02	Bi	0.035602178578364	Eu	0.017602659311489	Fe	0.92461527303085	0.141902907756272	4766.41341364061
Al	0.02	Bi	0.035602178578364	Eu	0.017602659311489	Hf	0.92461527303085	0.225980043847182	3005.80646702614
Al	0.02	Bi	0.035602178578364	Eu	0.017602659311489	In	0.92461527303085	0.165047290695325	1342.49622009299
Al	0.02	Bi	0.035602178578364	Eu	0.017602659311489	K	0.92461527303085	0.103851929117852	2069.90487961528
Al	0.02	Bi	0.035602178578364	Eu	0.017602659311489	La	0.92461527303085	0.164039111559579	2510.0566162689
Al	0.02	Bi	0.035602178578364	Eu	0.017602659311489	Li	0.92461527303085	0.110248862799567	5776.44581985628
Al	0.02	Bi	0.035602178578364	Eu	0.017602659311489	Mg	0.92461527303085	0.125585602575049	4481.00976124205
Al	0.02	Bi	0.035602178578364	Eu	0.017602659311489	Mn	0.92461527303085	0.138225277835365	4988.80587005507
Al	0.02	Bi	0.035602178578364	Eu	0.017602659311489	Mo	0.92461527303085	0.134502798769081	5952.50651451773
Al	0.02	Bi	0.035602178578364	Eu	0.017602659311489	Na	0.92461527303085	0.099241362842286	3181.86716168758
Al	0.02	Bi	0.035602178578364	Eu	0.017602659311489	Nd	0.92461527303085	0.176453243803681	2375.69450718517
Al	0.02	Bi	0.035602178578364	Eu	0.017602659311489	Ni	0.92461527303085	0.149272993761847	4822.01152774423
Al	0.02	Bi	0.035602178578364	Eu	0.017602659311489	Rb	0.92461527303085	0.109871722258897	1421.26021507311
Al	0.02	Bi	0.035602178578364	Eu	0.017602659311489	Pd	0.92461527303085	0.146327035022544	3061.40458112975
Al	0.02	Bi	0.035602178578364	Eu	0.017602659311489	Si	0.92461527303085	0.17827315540534	2255.23192662733
Al	0.02	Bi	0.035602178578364	Eu	0.017602659311489	Sm	0.92461527303085	0.184727169817534	2190.36746017312
Al	0.02	Bi	0.035602178578364	Eu	0.017602659311489	Sr	0.92461527303085	0.122679859804947	4390.41453576571
Al	0.02	Bi	0.035602178578364	Eu	0.017602659311489	Ti	0.92461527303085	0.127179137188782	4052.90428264422
Al	0.02	Bi	0.035602178578364	Eu	0.017602659311489	V	0.92461527303085	0.130858527716636	4442.09108136952
Al	0.02	Bi	0.035602178578364	Eu	0.017602659311489	W	0.92461527303085	0.234378509636627	5011.04511569652
Al	0.02	Bi	0.035602178578364	Eu	0.017602659311489	Y	0.92461527303085	0.125636196858883	3274.53068519361
Al	0.02	Bi	0.035602178578364	Eu	0.017602659311489	Yb	0.92461527303085	0.217828433684357	1689.98443324058
Al	0.02	Bi	0.035602178578364	Eu	0.017602659311489	Zn	0.92461527303085	0.156635110704401	3645.18477921771
Al	0.02	Bi	0.035602178578364	Eu	0.017602659311489	Zr	0.92461527303085	0.128592255922249	3737.84830272373
Al	0.02	Bi	0.035602178578364	Fe	0.017602659311489	Al	0.92461527303085	0.151039465387285	4978.54753072501
Al	0.02	Bi	0.035602178578364	Fe	0.017602659311489	Ba	0.92461527303085	0.159009084389945	1753.85691271534
Al	0.02	Bi	0.035602178578364	Fe	0.017602659311489	Bi	0.92461527303085	0.180968856844496	1911.38490267558
Al	0.02	Bi	0.035602178578364	Fe	0.017602659311489	Ca	0.92461527303085	0.118916635665163	3783.18807749728
Al	0.02	Bi	0.035602178578364	Fe	0.017602659311489	Ce	0.92461527303085	0.167285234328362	2198.64182554426
Al	0.02	Bi	0.035602178578364	Fe	0.017602659311489	Co	0.92461527303085	0.144699705099574	4626.42614140211
Al	0.02	Bi	0.035602178578364	Fe	0.017602659311489	Cs	0.92461527303085	0.154870638766642	2270.25031451355
Al	0.02	Bi	0.035602178578364	Fe	0.017602659311489	Cu	0.92461527303085	0.152052833680347	3560.79562108282
Al	0.02	Bi	0.035602178578364	Fe	0.017602659311489	Eu	0.92461527303085	0.187972365951082	2907.65738259669
Al	0.02	Bi	0.035602178578364	Fe	0.017602659311489	Fe	0.92461527303085	0.141008824294805	4802.48683606356
Al	0.02	Bi	0.035602178578364	Fe	0.017602659311489	Hf	0.92461527303085	0.225085960385715	3041.87988944908
Al	0.02	Bi	0.035602178578364	Fe	0.017602659311489	In	0.92461527303085	0.164153207233858	1378.56964251594
Al	0.02	Bi	0.035602178578364	Fe	0.017602659311489	K	0.92461527303085	0.102957845656385	2105.97830203823
Al	0.02	Bi	0.035602178578364	Fe	0.017602659311489	La	0.92461527303085	0.163145028098113	2546.13003869185
Al	0.02	Bi	0.035602178578364	Fe	0.017602659311489	Li	0.92461527303085	0.1093547793381	5812.51924227923
Al	0.02	Bi	0.035602178578364	Fe	0.017602659311489	Mg	0.92461527303085	0.124691519113582	4517.083183665
Al	0.02	Bi	0.035602178578364	Fe	0.017602659311489	Mn	0.92461527303085	0.137331194373898	5024.87929247802
Al	0.02	Bi	0.035602178578364	Fe	0.017602659311489	Mo	0.92461527303085	0.133608715307614	5988.57993694068
Al	0.02	Bi	0.035602178578364	Fe	0.017602659311489	Na	0.92461527303085	0.098347279380819	3217.94058411053
Al	0.02	Bi	0.035602178578364	Fe	0.017602659311489	Nd	0.92461527303085	0.175559160342215	2411.76792960811
Al	0.02	Bi	0.035602178578364	Fe	0.017602659311489	Ni	0.92461527303085	0.14837891030038	4858.08495016717
Al	0.02	Bi	0.035602178578364	Fe	0.017602659311489	Rb	0.92461527303085	0.108977638797431	1457.33363749606
Al	0.02	Bi	0.035602178578364	Fe	0.017602659311489	Pd	0.92461527303085	0.145432951561077	3097.4780035527
Al	0.02	Bi	0.035602178578364	Fe	0.017602659311489	Si	0.92461527303085	0.177379071943873	2291.30534905028
Al	0.02	Bi	0.035602178578364	Fe	0.017602659311489	Sm	0.92461527303085	0.183833086356068	2226.44088259606
Al	0.02	Bi	0.035602178578364	Fe	0.017602659311489	Sr	0.92461527303085	0.12178577634348	4426.48795818866
Al	0.02	Bi	0.035602178578364	Fe	0.017602659311489	Ti	0.92461527303085	0.126285053727315	4088.97770506717
Al	0.02	Bi	0.035602178578364	Fe	0.017602659311489	V	0.92461527303085	0.129964444255169	4478.16450379247
Al	0.02	Bi	0.035602178578364	Fe	0.017602659311489	W	0.92461527303085	0.23348442617516	5047.11853811947
Al	0.02	Bi	0.035602178578364	Fe	0.017602659311489	Y	0.92461527303085	0.124742113397417	3310.60410761656
Al	0.02	Bi	0.035602178578364	Fe	0.017602659311489	Yb	0.92461527303085	0.21693435022289	1726.05785566353
Al	0.02	Bi	0.035602178578364	Fe	0.017602659311489	Zn	0.92461527303085	0.155741027242934	3681.25820164066
Al	0.02	Bi	0.035602178578364	Fe	0.017602659311489	Zr	0.92461527303085	0.127698172460782	3773.92172514668
Al	0.02	Bi	0.035602178578364	Hf	0.017602659311489	Al	0.92461527303085	0.152640110786147	4945.02941225276
Al	0.02	Bi	0.035602178578364	Hf	0.017602659311489	Ba	0.92461527303085	0.160609729788806	1720.33879424309
Al	0.02	Bi	0.035602178578364	Hf	0.017602659311489	Bi	0.92461527303085	0.182569502243358	1877.86678420333
Al	0.02	Bi	0.035602178578364	Hf	0.017602659311489	Ca	0.92461527303085	0.120517281064025	3749.66995902504
Al	0.02	Bi	0.035602178578364	Hf	0.017602659311489	Ce	0.92461527303085	0.168885879727223	2165.12370707201
Al	0.02	Bi	0.035602178578364	Hf	0.017602659311489	Co	0.92461527303085	0.146300350498435	4592.90802292987
Al	0.02	Bi	0.035602178578364	Hf	0.017602659311489	Cs	0.92461527303085	0.156471284165504	2236.73219604131
Al	0.02	Bi	0.035602178578364	Hf	0.017602659311489	Cu	0.92461527303085	0.153653479079209	3527.27750261058
Al	0.02	Bi	0.035602178578364	Hf	0.017602659311489	Eu	0.92461527303085	0.189573011349943	2874.13926412444
Al	0.02	Bi	0.035602178578364	Hf	0.017602659311489	Fe	0.92461527303085	0.142609469693667	4768.96871759131
Al	0.02	Bi	0.035602178578364	Hf	0.017602659311489	Hf	0.92461527303085	0.226686605784576	3008.36177097684
Al	0.02	Bi	0.035602178578364	Hf	0.017602659311489	In	0.92461527303085	0.16575385263272	1345.05152404369
Al	0.02	Bi	0.035602178578364	Hf	0.017602659311489	K	0.92461527303085	0.104558491055247	2072.46018356599
Al	0.02	Bi	0.035602178578364	Hf	0.017602659311489	La	0.92461527303085	0.164745673496974	2512.61192021961
Al	0.02	Bi	0.035602178578364	Hf	0.017602659311489	Li	0.92461527303085	0.110955424736962	5779.00112380699
Al	0.02	Bi	0.035602178578364	Hf	0.017602659311489	Mg	0.92461527303085	0.126292164512444	4483.56506519276
Al	0.02	Bi	0.035602178578364	Hf	0.017602659311489	Mn	0.92461527303085	0.13893183977276	4991.36117400577
Al	0.02	Bi	0.035602178578364	Hf	0.017602659311489	Mo	0.92461527303085	0.135209360706476	5955.06181846843
Al	0.02	Bi	0.035602178578364	Hf	0.017602659311489	Na	0.92461527303085	0.099947924779681	3184.42246563829
Al	0.02	Bi	0.035602178578364	Hf	0.017602659311489	Nd	0.92461527303085	0.177159805741076	2378.24981113587
Al	0.02	Bi	0.035602178578364	Hf	0.017602659311489	Ni	0.92461527303085	0.149979555699242	4824.56683169493
Al	0.02	Bi	0.035602178578364	Hf	0.017602659311489	Rb	0.92461527303085	0.110578284196292	1423.81551902381
Al	0.02	Bi	0.035602178578364	Hf	0.017602659311489	Pd	0.92461527303085	0.147033596959939	3063.95988508045
Al	0.02	Bi	0.035602178578364	Hf	0.017602659311489	Si	0.92461527303085	0.178979717342735	2257.78723057804
Al	0.02	Bi	0.035602178578364	Hf	0.017602659311489	Sm	0.92461527303085	0.185433731754929	2192.92276412382
Al	0.02	Bi	0.035602178578364	Hf	0.017602659311489	Sr	0.92461527303085	0.123386421742342	4392.96983971642
Al	0.02	Bi	0.035602178578364	Hf	0.017602659311489	Ti	0.92461527303085	0.127885699126177	4055.45958659492
Al	0.02	Bi	0.035602178578364	Hf	0.017602659311489	V	0.92461527303085	0.131565089654031	4444.64638532023
Al	0.02	Bi	0.035602178578364	Hf	0.017602659311489	W	0.92461527303085	0.235085071574022	5013.60041964722
Al	0.02	Bi	0.035602178578364	Hf	0.017602659311489	Y	0.92461527303085	0.126342758796278	3277.08598914431
Al	0.02	Bi	0.035602178578364	Hf	0.017602659311489	Yb	0.92461527303085	0.218534995621751	1692.53973719128
Al	0.02	Bi	0.035602178578364	Hf	0.017602659311489	Zn	0.92461527303085	0.157341672641796	3647.74008316841
Al	0.02	Bi	0.035602178578364	Hf	0.017602659311489	Zr	0.92461527303085	0.129298817859644	3740.40360667444
Al	0.02	Bi	0.035602178578364	In	0.017602659311489	Al	0.92461527303085	0.151480083988053	4913.36361085398
Al	0.02	Bi	0.035602178578364	In	0.017602659311489	Ba	0.92461527303085	0.159449702990712	1688.67299284431
Al	0.02	Bi	0.035602178578364	In	0.017602659311489	Bi	0.92461527303085	0.181409475445264	1846.20098280456
Al	0.02	Bi	0.035602178578364	In	0.017602659311489	Ca	0.92461527303085	0.11935725426593	3718.00415762626
Al	0.02	Bi	0.035602178578364	In	0.017602659311489	Ce	0.92461527303085	0.167725852929129	2133.45790567323
Al	0.02	Bi	0.035602178578364	In	0.017602659311489	Co	0.92461527303085	0.145140323700341	4561.24222153109
Al	0.02	Bi	0.035602178578364	In	0.017602659311489	Cs	0.92461527303085	0.155311257367409	2205.06639464253
Al	0.02	Bi	0.035602178578364	In	0.017602659311489	Cu	0.92461527303085	0.152493452281114	3495.6117012118
Al	0.02	Bi	0.035602178578364	In	0.017602659311489	Eu	0.92461527303085	0.188412984551849	2842.47346272566
Al	0.02	Bi	0.035602178578364	In	0.017602659311489	Fe	0.92461527303085	0.141449442895572	4737.30291619254
Al	0.02	Bi	0.035602178578364	In	0.017602659311489	Hf	0.92461527303085	0.225526578986482	2976.69596957806
Al	0.02	Bi	0.035602178578364	In	0.017602659311489	In	0.92461527303085	0.164593825834625	1313.38572264491
Al	0.02	Bi	0.035602178578364	In	0.017602659311489	K	0.92461527303085	0.103398464257152	2040.79438216721
Al	0.02	Bi	0.035602178578364	In	0.017602659311489	La	0.92461527303085	0.16358564669888	2480.94611882083
Al	0.02	Bi	0.035602178578364	In	0.017602659311489	Li	0.92461527303085	0.109795397938867	5747.33532240821
Al	0.02	Bi	0.035602178578364	In	0.017602659311489	Mg	0.92461527303085	0.125132137714349	4451.89926379398
Al	0.02	Bi	0.035602178578364	In	0.017602659311489	Mn	0.92461527303085	0.137771812974665	4959.69537260699
Al	0.02	Bi	0.035602178578364	In	0.017602659311489	Mo	0.92461527303085	0.134049333908381	5923.39601706965
Al	0.02	Bi	0.035602178578364	In	0.017602659311489	Na	0.92461527303085	0.098787897981587	3152.75666423951
Al	0.02	Bi	0.035602178578364	In	0.017602659311489	Nd	0.92461527303085	0.175999778942982	2346.58400973709
Al	0.02	Bi	0.035602178578364	In	0.017602659311489	Ni	0.92461527303085	0.148819528901148	4792.90103029615
Al	0.02	Bi	0.035602178578364	In	0.017602659311489	Rb	0.92461527303085	0.109418257398198	1392.14971762503
Al	0.02	Bi	0.035602178578364	In	0.017602659311489	Pd	0.92461527303085	0.145873570161844	3032.29408368167
Al	0.02	Bi	0.035602178578364	In	0.017602659311489	Si	0.92461527303085	0.17781969054464	2226.12142917926
Al	0.02	Bi	0.035602178578364	In	0.017602659311489	Sm	0.92461527303085	0.184273704956835	2161.25696272504
Al	0.02	Bi	0.035602178578364	In	0.017602659311489	Sr	0.92461527303085	0.122226394944248	4361.30403831764
Al	0.02	Bi	0.035602178578364	In	0.017602659311489	Ti	0.92461527303085	0.126725672328083	4023.79378519614
Al	0.02	Bi	0.035602178578364	In	0.017602659311489	V	0.92461527303085	0.130405062855936	4412.98058392145
Al	0.02	Bi	0.035602178578364	In	0.017602659311489	W	0.92461527303085	0.233925044775927	4981.93461824844
Al	0.02	Bi	0.035602178578364	In	0.017602659311489	Y	0.92461527303085	0.125182731998184	3245.42018774553
Al	0.02	Bi	0.035602178578364	In	0.017602659311489	Yb	0.92461527303085	0.217374968823657	1660.87393579251
Al	0.02	Bi	0.035602178578364	In	0.017602659311489	Zn	0.92461527303085	0.156181645843701	3616.07428176963
Al	0.02	Bi	0.035602178578364	In	0.017602659311489	Zr	0.92461527303085	0.128138791061549	3708.73780527566
Al	0.02	Bi	0.035602178578364	K	0.017602659311489	Al	0.92461527303085	0.150315057697971	4927.21188611752
Al	0.02	Bi	0.035602178578364	K	0.017602659311489	Ba	0.92461527303085	0.15828467670063	1702.52126810785
Al	0.02	Bi	0.035602178578364	K	0.017602659311489	Bi	0.92461527303085	0.180244449155182	1860.04925806809
Al	0.02	Bi	0.035602178578364	K	0.017602659311489	Ca	0.92461527303085	0.118192227975849	3731.85243288979
Al	0.02	Bi	0.035602178578364	K	0.017602659311489	Ce	0.92461527303085	0.166560826639048	2147.30618093677
Al	0.02	Bi	0.035602178578364	K	0.017602659311489	Co	0.92461527303085	0.14397529741026	4575.09049679462
Al	0.02	Bi	0.035602178578364	K	0.017602659311489	Cs	0.92461527303085	0.154146231077328	2218.91466990606
Al	0.02	Bi	0.035602178578364	K	0.017602659311489	Cu	0.92461527303085	0.151328425991033	3509.45997647533
Al	0.02	Bi	0.035602178578364	K	0.017602659311489	Eu	0.92461527303085	0.187247958261768	2856.32173798919
Al	0.02	Bi	0.035602178578364	K	0.017602659311489	Fe	0.92461527303085	0.140284416605491	4751.15119145607
Al	0.02	Bi	0.035602178578364	K	0.017602659311489	Hf	0.92461527303085	0.224361552696401	2990.54424484159
Al	0.02	Bi	0.035602178578364	K	0.017602659311489	In	0.92461527303085	0.163428799544544	1327.23399790844
Al	0.02	Bi	0.035602178578364	K	0.017602659311489	K	0.92461527303085	0.102233437967071	2054.64265743074
Al	0.02	Bi	0.035602178578364	K	0.017602659311489	La	0.92461527303085	0.162420620408798	2494.79439408436
Al	0.02	Bi	0.035602178578364	K	0.017602659311489	Li	0.92461527303085	0.108630371648786	5761.18359767174
Al	0.02	Bi	0.035602178578364	K	0.017602659311489	Mg	0.92461527303085	0.123967111424268	4465.74753905751
Al	0.02	Bi	0.035602178578364	K	0.017602659311489	Mn	0.92461527303085	0.136606786684584	4973.54364787053
Al	0.02	Bi	0.035602178578364	K	0.017602659311489	Mo	0.92461527303085	0.1328843076183	5937.24429233319
Al	0.02	Bi	0.035602178578364	K	0.017602659311489	Na	0.92461527303085	0.097622871691505	3166.60493950304
Al	0.02	Bi	0.035602178578364	K	0.017602659311489	Nd	0.92461527303085	0.174834752652901	2360.43228500062
Al	0.02	Bi	0.035602178578364	K	0.017602659311489	Ni	0.92461527303085	0.147654502611066	4806.74930555968
Al	0.02	Bi	0.035602178578364	K	0.017602659311489	Rb	0.92461527303085	0.108253231108116	1405.99799288857
Al	0.02	Bi	0.035602178578364	K	0.017602659311489	Pd	0.92461527303085	0.144708543871763	3046.14235894521
Al	0.02	Bi	0.035602178578364	K	0.017602659311489	Si	0.92461527303085	0.176654664254559	2239.96970444279
Al	0.02	Bi	0.035602178578364	K	0.017602659311489	Sm	0.92461527303085	0.183108678666754	2175.10523798857
Al	0.02	Bi	0.035602178578364	K	0.017602659311489	Sr	0.92461527303085	0.121061368654166	4375.15231358117
Al	0.02	Bi	0.035602178578364	K	0.017602659311489	Ti	0.92461527303085	0.125560646038001	4037.64206045968
Al	0.02	Bi	0.035602178578364	K	0.017602659311489	V	0.92461527303085	0.129240036565855	4426.82885918498
Al	0.02	Bi	0.035602178578364	K	0.017602659311489	W	0.92461527303085	0.232760018485846	4995.78289351197
Al	0.02	Bi	0.035602178578364	K	0.017602659311489	Y	0.92461527303085	0.124017705708102	3259.26846300907
Al	0.02	Bi	0.035602178578364	K	0.017602659311489	Yb	0.92461527303085	0.216209942533576	1674.72221105604
Al	0.02	Bi	0.035602178578364	K	0.017602659311489	Zn	0.92461527303085	0.15501661955362	3629.92255703316
Al	0.02	Bi	0.035602178578364	K	0.017602659311489	Zr	0.92461527303085	0.126973764771468	3722.58608053919
Al	0.02	Bi	0.035602178578364	La	0.017602659311489	Al	0.92461527303085	0.151460890454948	4935.59141573558
Al	0.02	Bi	0.035602178578364	La	0.017602659311489	Ba	0.92461527303085	0.159430509457608	1710.90079772591
Al	0.02	Bi	0.035602178578364	La	0.017602659311489	Bi	0.92461527303085	0.181390281912159	1868.42878768615
Al	0.02	Bi	0.035602178578364	La	0.017602659311489	Ca	0.92461527303085	0.119338060732826	3740.23196250785
Al	0.02	Bi	0.035602178578364	La	0.017602659311489	Ce	0.92461527303085	0.167706659396025	2155.68571055483
Al	0.02	Bi	0.035602178578364	La	0.017602659311489	Co	0.92461527303085	0.145121130167237	4583.47002641268
Al	0.02	Bi	0.035602178578364	La	0.017602659311489	Cs	0.92461527303085	0.155292063834305	2227.29419952412
Al	0.02	Bi	0.035602178578364	La	0.017602659311489	Cu	0.92461527303085	0.15247425874801	3517.83950609339
Al	0.02	Bi	0.035602178578364	La	0.017602659311489	Eu	0.92461527303085	0.188393791018745	2864.70126760726
Al	0.02	Bi	0.035602178578364	La	0.017602659311489	Fe	0.92461527303085	0.141430249362468	4759.53072107413
Al	0.02	Bi	0.035602178578364	La	0.017602659311489	Hf	0.92461527303085	0.225507385453378	2998.92377445965
Al	0.02	Bi	0.035602178578364	La	0.017602659311489	In	0.92461527303085	0.164574632301521	1335.61352752651
Al	0.02	Bi	0.035602178578364	La	0.017602659311489	K	0.92461527303085	0.103379270724048	2063.0221870488
Al	0.02	Bi	0.035602178578364	La	0.017602659311489	La	0.92461527303085	0.163566453165776	2503.17392370242
Al	0.02	Bi	0.035602178578364	La	0.017602659311489	Li	0.92461527303085	0.109776204405763	5769.5631272898
Al	0.02	Bi	0.035602178578364	La	0.017602659311489	Mg	0.92461527303085	0.125112944181245	4474.12706867557
Al	0.02	Bi	0.035602178578364	La	0.017602659311489	Mn	0.92461527303085	0.137752619441561	4981.92317748859
Al	0.02	Bi	0.035602178578364	La	0.017602659311489	Mo	0.92461527303085	0.134030140375277	5945.62382195125
Al	0.02	Bi	0.035602178578364	La	0.017602659311489	Na	0.92461527303085	0.098768704448483	3174.9844691211
Al	0.02	Bi	0.035602178578364	La	0.017602659311489	Nd	0.92461527303085	0.175980585409878	2368.81181461868
Al	0.02	Bi	0.035602178578364	La	0.017602659311489	Ni	0.92461527303085	0.148800335368044	4815.12883517774
Al	0.02	Bi	0.035602178578364	La	0.017602659311489	Rb	0.92461527303085	0.109399063865094	1414.37752250663
Al	0.02	Bi	0.035602178578364	La	0.017602659311489	Pd	0.92461527303085	0.14585437662874	3054.52188856327
Al	0.02	Bi	0.035602178578364	La	0.017602659311489	Si	0.92461527303085	0.177800497011536	2248.34923406085
Al	0.02	Bi	0.035602178578364	La	0.017602659311489	Sm	0.92461527303085	0.184254511423731	2183.48476760663
Al	0.02	Bi	0.035602178578364	La	0.017602659311489	Sr	0.92461527303085	0.122207201411143	4383.53184319923
Al	0.02	Bi	0.035602178578364	La	0.017602659311489	Ti	0.92461527303085	0.126706478794978	4046.02159007774
Al	0.02	Bi	0.035602178578364	La	0.017602659311489	V	0.92461527303085	0.130385869322832	4435.20838880304
Al	0.02	Bi	0.035602178578364	La	0.017602659311489	W	0.92461527303085	0.233905851242823	5004.16242313004
Al	0.02	Bi	0.035602178578364	La	0.017602659311489	Y	0.92461527303085	0.12516353846508	3267.64799262713
Al	0.02	Bi	0.035602178578364	La	0.017602659311489	Yb	0.92461527303085	0.217355775290553	1683.1017406741
Al	0.02	Bi	0.035602178578364	La	0.017602659311489	Zn	0.92461527303085	0.156162452310597	3638.30208665123
Al	0.02	Bi	0.035602178578364	La	0.017602659311489	Zr	0.92461527303085	0.128119597528445	3730.96561015725
Al	0.02	Bi	0.035602178578364	Li	0.017602659311489	Al	0.92461527303085	0.150436841371161	4997.77634605908
Al	0.02	Bi	0.035602178578364	Li	0.017602659311489	Ba	0.92461527303085	0.158406460373821	1773.08572804942
Al	0.02	Bi	0.035602178578364	Li	0.017602659311489	Bi	0.92461527303085	0.180366232828372	1930.61371800966
Al	0.02	Bi	0.035602178578364	Li	0.017602659311489	Ca	0.92461527303085	0.118314011649039	3802.41689283136
Al	0.02	Bi	0.035602178578364	Li	0.017602659311489	Ce	0.92461527303085	0.166682610312238	2217.87064087833
Al	0.02	Bi	0.035602178578364	Li	0.017602659311489	Co	0.92461527303085	0.14409708108345	4645.65495673619
Al	0.02	Bi	0.035602178578364	Li	0.017602659311489	Cs	0.92461527303085	0.154268014750518	2289.47912984763
Al	0.02	Bi	0.035602178578364	Li	0.017602659311489	Cu	0.92461527303085	0.151450209664223	3580.0244364169
Al	0.02	Bi	0.035602178578364	Li	0.017602659311489	Eu	0.92461527303085	0.187369741934958	2926.88619793076
Al	0.02	Bi	0.035602178578364	Li	0.017602659311489	Fe	0.92461527303085	0.140406200278681	4821.71565139764
Al	0.02	Bi	0.035602178578364	Li	0.017602659311489	Hf	0.92461527303085	0.224483336369591	3061.10870478316
Al	0.02	Bi	0.035602178578364	Li	0.017602659311489	In	0.92461527303085	0.163550583217734	1397.79845785001
Al	0.02	Bi	0.035602178578364	Li	0.017602659311489	K	0.92461527303085	0.102355221640261	2125.20711737231
Al	0.02	Bi	0.035602178578364	Li	0.017602659311489	La	0.92461527303085	0.162542404081989	2565.35885402593
Al	0.02	Bi	0.035602178578364	Li	0.017602659311489	Li	0.92461527303085	0.108752155321976	5831.74805761331
Al	0.02	Bi	0.035602178578364	Li	0.017602659311489	Mg	0.92461527303085	0.124088895097458	4536.31199899908
Al	0.02	Bi	0.035602178578364	Li	0.017602659311489	Mn	0.92461527303085	0.136728570357774	5044.1081078121
Al	0.02	Bi	0.035602178578364	Li	0.017602659311489	Mo	0.92461527303085	0.13300609129149	6007.80875227476
Al	0.02	Bi	0.035602178578364	Li	0.017602659311489	Na	0.92461527303085	0.097744655364695	3237.16939944461
Al	0.02	Bi	0.035602178578364	Li	0.017602659311489	Nd	0.92461527303085	0.174956536326091	2430.99674494219
Al	0.02	Bi	0.035602178578364	Li	0.017602659311489	Ni	0.92461527303085	0.147776286284256	4877.31376550125
Al	0.02	Bi	0.035602178578364	Li	0.017602659311489	Rb	0.92461527303085	0.108375014781307	1476.56245283014
Al	0.02	Bi	0.035602178578364	Li	0.017602659311489	Pd	0.92461527303085	0.144830327544953	3116.70681888678
Al	0.02	Bi	0.035602178578364	Li	0.017602659311489	Si	0.92461527303085	0.176776447927749	2310.53416438436
Al	0.02	Bi	0.035602178578364	Li	0.017602659311489	Sm	0.92461527303085	0.183230462339944	2245.66969793014
Al	0.02	Bi	0.035602178578364	Li	0.017602659311489	Sr	0.92461527303085	0.121183152327356	4445.71677352274
Al	0.02	Bi	0.035602178578364	Li	0.017602659311489	Ti	0.92461527303085	0.125682429711191	4108.20652040124
Al	0.02	Bi	0.035602178578364	Li	0.017602659311489	V	0.92461527303085	0.129361820239045	4497.39331912655
Al	0.02	Bi	0.035602178578364	Li	0.017602659311489	W	0.92461527303085	0.232881802159036	5066.34735345354
Al	0.02	Bi	0.035602178578364	Li	0.017602659311489	Y	0.92461527303085	0.124139489381293	3329.83292295063
Al	0.02	Bi	0.035602178578364	Li	0.017602659311489	Yb	0.92461527303085	0.216331726206766	1745.28667099761
Al	0.02	Bi	0.035602178578364	Li	0.017602659311489	Zn	0.92461527303085	0.15513840322681	3700.48701697473
Al	0.02	Bi	0.035602178578364	Li	0.017602659311489	Zr	0.92461527303085	0.127095548444658	3793.15054048076
Al	0.02	Bi	0.035602178578364	Mg	0.017602659311489	Al	0.92461527303085	0.150728819465285	4973.11406730951
Al	0.02	Bi	0.035602178578364	Mg	0.017602659311489	Ba	0.92461527303085	0.158698438467944	1748.42344929984
Al	0.02	Bi	0.035602178578364	Mg	0.017602659311489	Bi	0.92461527303085	0.180658210922496	1905.95143926008
Al	0.02	Bi	0.035602178578364	Mg	0.017602659311489	Ca	0.92461527303085	0.118605989743163	3777.75461408178
Al	0.02	Bi	0.035602178578364	Mg	0.017602659311489	Ce	0.92461527303085	0.166974588406361	2193.20836212876
Al	0.02	Bi	0.035602178578364	Mg	0.017602659311489	Co	0.92461527303085	0.144389059177573	4620.99267798661
Al	0.02	Bi	0.035602178578364	Mg	0.017602659311489	Cs	0.92461527303085	0.154559992844641	2264.81685109805
Al	0.02	Bi	0.035602178578364	Mg	0.017602659311489	Cu	0.92461527303085	0.151742187758347	3555.36215766732
Al	0.02	Bi	0.035602178578364	Mg	0.017602659311489	Eu	0.92461527303085	0.187661720029081	2902.22391918119
Al	0.02	Bi	0.035602178578364	Mg	0.017602659311489	Fe	0.92461527303085	0.140698178372804	4797.05337264806
Al	0.02	Bi	0.035602178578364	Mg	0.017602659311489	Hf	0.92461527303085	0.224775314463714	3036.44642603358
Al	0.02	Bi	0.035602178578364	Mg	0.017602659311489	In	0.92461527303085	0.163842561311857	1373.13617910044
Al	0.02	Bi	0.035602178578364	Mg	0.017602659311489	K	0.92461527303085	0.102647199734384	2100.54483862273
Al	0.02	Bi	0.035602178578364	Mg	0.017602659311489	La	0.92461527303085	0.162834382176112	2540.69657527635
Al	0.02	Bi	0.035602178578364	Mg	0.017602659311489	Li	0.92461527303085	0.109044133416099	5807.08577886373
Al	0.02	Bi	0.035602178578364	Mg	0.017602659311489	Mg	0.92461527303085	0.124380873191582	4511.6497202495
Al	0.02	Bi	0.035602178578364	Mg	0.017602659311489	Mn	0.92461527303085	0.137020548451897	5019.44582906252
Al	0.02	Bi	0.035602178578364	Mg	0.017602659311489	Mo	0.92461527303085	0.133298069385613	5983.14647352518
Al	0.02	Bi	0.035602178578364	Mg	0.017602659311489	Na	0.92461527303085	0.098036633458819	3212.50712069503
Al	0.02	Bi	0.035602178578364	Mg	0.017602659311489	Nd	0.92461527303085	0.175248514420214	2406.33446619261
Al	0.02	Bi	0.035602178578364	Mg	0.017602659311489	Ni	0.92461527303085	0.14806826437838	4852.65148675167
Al	0.02	Bi	0.035602178578364	Mg	0.017602659311489	Rb	0.92461527303085	0.10866699287543	1451.90017408056
Al	0.02	Bi	0.035602178578364	Mg	0.017602659311489	Pd	0.92461527303085	0.145122305639076	3092.0445401372
Al	0.02	Bi	0.035602178578364	Mg	0.017602659311489	Si	0.92461527303085	0.177068426021872	2285.87188563478
Al	0.02	Bi	0.035602178578364	Mg	0.017602659311489	Sm	0.92461527303085	0.183522440434067	2221.00741918056
Al	0.02	Bi	0.035602178578364	Mg	0.017602659311489	Sr	0.92461527303085	0.12147513042148	4421.05449477316
Al	0.02	Bi	0.035602178578364	Mg	0.017602659311489	Ti	0.92461527303085	0.125974407805315	4083.54424165167
Al	0.02	Bi	0.035602178578364	Mg	0.017602659311489	V	0.92461527303085	0.129653798333168	4472.73104037697
Al	0.02	Bi	0.035602178578364	Mg	0.017602659311489	W	0.92461527303085	0.233173780253159	5041.68507470396
Al	0.02	Bi	0.035602178578364	Mg	0.017602659311489	Y	0.92461527303085	0.124431467475416	3305.17064420106
Al	0.02	Bi	0.035602178578364	Mg	0.017602659311489	Yb	0.92461527303085	0.216623704300889	1720.62439224803
Al	0.02	Bi	0.035602178578364	Mg	0.017602659311489	Zn	0.92461527303085	0.155430381320933	3675.82473822516
Al	0.02	Bi	0.035602178578364	Mg	0.017602659311489	Zr	0.92461527303085	0.127387526538782	3768.48826173118
Al	0.02	Bi	0.035602178578364	Mn	0.017602659311489	Al	0.92461527303085	0.150969451330131	4982.7813983215
Al	0.02	Bi	0.035602178578364	Mn	0.017602659311489	Ba	0.92461527303085	0.158939070332791	1758.09078031183
Al	0.02	Bi	0.035602178578364	Mn	0.017602659311489	Bi	0.92461527303085	0.180898842787342	1915.61877027207
Al	0.02	Bi	0.035602178578364	Mn	0.017602659311489	Ca	0.92461527303085	0.118846621608009	3787.42194509378
Al	0.02	Bi	0.035602178578364	Mn	0.017602659311489	Ce	0.92461527303085	0.167215220271208	2202.87569314075
Al	0.02	Bi	0.035602178578364	Mn	0.017602659311489	Co	0.92461527303085	0.14462969104242	4630.66000899861
Al	0.02	Bi	0.035602178578364	Mn	0.017602659311489	Cs	0.92461527303085	0.154800624709488	2274.48418211004
Al	0.02	Bi	0.035602178578364	Mn	0.017602659311489	Cu	0.92461527303085	0.151982819623193	3565.02948867932
Al	0.02	Bi	0.035602178578364	Mn	0.017602659311489	Eu	0.92461527303085	0.187902351893928	2911.89125019318
Al	0.02	Bi	0.035602178578364	Mn	0.017602659311489	Fe	0.92461527303085	0.140938810237651	4806.72070366005
Al	0.02	Bi	0.035602178578364	Mn	0.017602659311489	Hf	0.92461527303085	0.225015946328561	3046.11375704558
Al	0.02	Bi	0.035602178578364	Mn	0.017602659311489	In	0.92461527303085	0.164083193176704	1382.80351011243
Al	0.02	Bi	0.035602178578364	Mn	0.017602659311489	K	0.92461527303085	0.102887831599231	2110.21216963473
Al	0.02	Bi	0.035602178578364	Mn	0.017602659311489	La	0.92461527303085	0.163075014040959	2550.36390628834
Al	0.02	Bi	0.035602178578364	Mn	0.017602659311489	Li	0.92461527303085	0.109284765280946	5816.75310987573
Al	0.02	Bi	0.035602178578364	Mn	0.017602659311489	Mg	0.92461527303085	0.124621505056428	4521.3170512615
Al	0.02	Bi	0.035602178578364	Mn	0.017602659311489	Mn	0.92461527303085	0.137261180316744	5029.11316007451
Al	0.02	Bi	0.035602178578364	Mn	0.017602659311489	Mo	0.92461527303085	0.13353870125046	5992.81380453717
Al	0.02	Bi	0.035602178578364	Mn	0.017602659311489	Na	0.92461527303085	0.098277265323665	3222.17445170703
Al	0.02	Bi	0.035602178578364	Mn	0.017602659311489	Nd	0.92461527303085	0.175489146285061	2416.00179720461
Al	0.02	Bi	0.035602178578364	Mn	0.017602659311489	Ni	0.92461527303085	0.148308896243226	4862.31881776367
Al	0.02	Bi	0.035602178578364	Mn	0.017602659311489	Rb	0.92461527303085	0.108907624740277	1461.56750509255
Al	0.02	Bi	0.035602178578364	Mn	0.017602659311489	Pd	0.92461527303085	0.145362937503923	3101.71187114919
Al	0.02	Bi	0.035602178578364	Mn	0.017602659311489	Si	0.92461527303085	0.177309057886719	2295.53921664678
Al	0.02	Bi	0.035602178578364	Mn	0.017602659311489	Sm	0.92461527303085	0.183763072298914	2230.67475019256
Al	0.02	Bi	0.035602178578364	Mn	0.017602659311489	Sr	0.92461527303085	0.121715762286326	4430.72182578516
Al	0.02	Bi	0.035602178578364	Mn	0.017602659311489	Ti	0.92461527303085	0.126215039670161	4093.21157266366
Al	0.02	Bi	0.035602178578364	Mn	0.017602659311489	V	0.92461527303085	0.129894430198015	4482.39837138897
Al	0.02	Bi	0.035602178578364	Mn	0.017602659311489	W	0.92461527303085	0.233414412118006	5051.35240571596
Al	0.02	Bi	0.035602178578364	Mn	0.017602659311489	Y	0.92461527303085	0.124672099340263	3314.83797521305
Al	0.02	Bi	0.035602178578364	Mn	0.017602659311489	Yb	0.92461527303085	0.216864336165736	1730.29172326002
Al	0.02	Bi	0.035602178578364	Mn	0.017602659311489	Zn	0.92461527303085	0.15567101318578	3685.49206923715
Al	0.02	Bi	0.035602178578364	Mn	0.017602659311489	Zr	0.92461527303085	0.127628158403628	3778.15559274318
Al	0.02	Bi	0.035602178578364	Mo	0.017602659311489	Al	0.92461527303085	0.150898583443012	5001.12815790631
Al	0.02	Bi	0.035602178578364	Mo	0.017602659311489	Ba	0.92461527303085	0.158868202445671	1776.43753989664
Al	0.02	Bi	0.035602178578364	Mo	0.017602659311489	Bi	0.92461527303085	0.180827974900223	1933.96552985688
Al	0.02	Bi	0.035602178578364	Mo	0.017602659311489	Ca	0.92461527303085	0.11877575372089	3805.76870467859
Al	0.02	Bi	0.035602178578364	Mo	0.017602659311489	Ce	0.92461527303085	0.167144352384088	2221.22245272556
Al	0.02	Bi	0.035602178578364	Mo	0.017602659311489	Co	0.92461527303085	0.1445588231553	4649.00676858341
Al	0.02	Bi	0.035602178578364	Mo	0.017602659311489	Cs	0.92461527303085	0.154729756822369	2292.83094169485
Al	0.02	Bi	0.035602178578364	Mo	0.017602659311489	Cu	0.92461527303085	0.151911951736074	3583.37624826413
Al	0.02	Bi	0.035602178578364	Mo	0.017602659311489	Eu	0.92461527303085	0.187831484006808	2930.23800977799
Al	0.02	Bi	0.035602178578364	Mo	0.017602659311489	Fe	0.92461527303085	0.140867942350532	4825.06746324486
Al	0.02	Bi	0.035602178578364	Mo	0.017602659311489	Hf	0.92461527303085	0.224945078441442	3064.46051663039
Al	0.02	Bi	0.035602178578364	Mo	0.017602659311489	In	0.92461527303085	0.164012325289585	1401.15026969724
Al	0.02	Bi	0.035602178578364	Mo	0.017602659311489	K	0.92461527303085	0.102816963712112	2128.55892921953
Al	0.02	Bi	0.035602178578364	Mo	0.017602659311489	La	0.92461527303085	0.163004146153839	2568.71066587315
Al	0.02	Bi	0.035602178578364	Mo	0.017602659311489	Li	0.92461527303085	0.109213897393827	5835.09986946053
Al	0.02	Bi	0.035602178578364	Mo	0.017602659311489	Mg	0.92461527303085	0.124550637169309	4539.6638108463
Al	0.02	Bi	0.035602178578364	Mo	0.017602659311489	Mn	0.92461527303085	0.137190312429625	5047.45991965932
Al	0.02	Bi	0.035602178578364	Mo	0.017602659311489	Mo	0.92461527303085	0.133467833363341	6011.16056412198
Al	0.02	Bi	0.035602178578364	Mo	0.017602659311489	Na	0.92461527303085	0.098206397436546	3240.52121129183
Al	0.02	Bi	0.035602178578364	Mo	0.017602659311489	Nd	0.92461527303085	0.175418278397941	2434.34855678942
Al	0.02	Bi	0.035602178578364	Mo	0.017602659311489	Ni	0.92461527303085	0.148238028356107	4880.66557734848
Al	0.02	Bi	0.035602178578364	Mo	0.017602659311489	Rb	0.92461527303085	0.108836756853157	1479.91426467736
Al	0.02	Bi	0.035602178578364	Mo	0.017602659311489	Pd	0.92461527303085	0.145292069616804	3120.058630734
Al	0.02	Bi	0.035602178578364	Mo	0.017602659311489	Si	0.92461527303085	0.1772381899996	2313.88597623158
Al	0.02	Bi	0.035602178578364	Mo	0.017602659311489	Sm	0.92461527303085	0.183692204411794	2249.02150977737
Al	0.02	Bi	0.035602178578364	Mo	0.017602659311489	Sr	0.92461527303085	0.121644894399207	4449.06858536997
Al	0.02	Bi	0.035602178578364	Mo	0.017602659311489	Ti	0.92461527303085	0.126144171783042	4111.55833224847
Al	0.02	Bi	0.035602178578364	Mo	0.017602659311489	V	0.92461527303085	0.129823562310896	4500.74513097377
Al	0.02	Bi	0.035602178578364	Mo	0.017602659311489	W	0.92461527303085	0.233343544230887	5069.69916530077
Al	0.02	Bi	0.035602178578364	Mo	0.017602659311489	Y	0.92461527303085	0.124601231453143	3333.18473479786
Al	0.02	Bi	0.035602178578364	Mo	0.017602659311489	Yb	0.92461527303085	0.216793468278617	1748.63848284483
Al	0.02	Bi	0.035602178578364	Mo	0.017602659311489	Zn	0.92461527303085	0.155600145298661	3703.83882882196
Al	0.02	Bi	0.035602178578364	Mo	0.017602659311489	Zr	0.92461527303085	0.127557290516509	3796.50235232798
Al	0.02	Bi	0.035602178578364	Na	0.017602659311489	Al	0.92461527303085	0.15022728256625	4948.38122409999
Al	0.02	Bi	0.035602178578364	Na	0.017602659311489	Ba	0.92461527303085	0.158196901568909	1723.69060609032
Al	0.02	Bi	0.035602178578364	Na	0.017602659311489	Bi	0.92461527303085	0.180156674023461	1881.21859605056
Al	0.02	Bi	0.035602178578364	Na	0.017602659311489	Ca	0.92461527303085	0.118104452844128	3753.02177087226
Al	0.02	Bi	0.035602178578364	Na	0.017602659311489	Ce	0.92461527303085	0.166473051507326	2168.47551891924
Al	0.02	Bi	0.035602178578364	Na	0.017602659311489	Co	0.92461527303085	0.143887522278538	4596.25983477709
Al	0.02	Bi	0.035602178578364	Na	0.017602659311489	Cs	0.92461527303085	0.154058455945607	2240.08400788853
Al	0.02	Bi	0.035602178578364	Na	0.017602659311489	Cu	0.92461527303085	0.151240650859312	3530.6293144578
Al	0.02	Bi	0.035602178578364	Na	0.017602659311489	Eu	0.92461527303085	0.187160183130046	2877.49107597167
Al	0.02	Bi	0.035602178578364	Na	0.017602659311489	Fe	0.92461527303085	0.14019664147377	4772.32052943854
Al	0.02	Bi	0.035602178578364	Na	0.017602659311489	Hf	0.92461527303085	0.224273777564679	3011.71358282406
Al	0.02	Bi	0.035602178578364	Na	0.017602659311489	In	0.92461527303085	0.163341024412823	1348.40333589092
Al	0.02	Bi	0.035602178578364	Na	0.017602659311489	K	0.92461527303085	0.10214566283535	2075.81199541321
Al	0.02	Bi	0.035602178578364	Na	0.017602659311489	La	0.92461527303085	0.162332845277077	2515.96373206683
Al	0.02	Bi	0.035602178578364	Na	0.017602659311489	Li	0.92461527303085	0.108542596517065	5782.35293565421
Al	0.02	Bi	0.035602178578364	Na	0.017602659311489	Mg	0.92461527303085	0.123879336292547	4486.91687703998
Al	0.02	Bi	0.035602178578364	Na	0.017602659311489	Mn	0.92461527303085	0.136519011552863	4994.712985853
Al	0.02	Bi	0.035602178578364	Na	0.017602659311489	Mo	0.92461527303085	0.132796532486579	5958.41363031566
Al	0.02	Bi	0.035602178578364	Na	0.017602659311489	Na	0.92461527303085	0.097535096559784	3187.77427748551
Al	0.02	Bi	0.035602178578364	Na	0.017602659311489	Nd	0.92461527303085	0.174746977521179	2381.60162298309
Al	0.02	Bi	0.035602178578364	Na	0.017602659311489	Ni	0.92461527303085	0.147566727479345	4827.91864354215
Al	0.02	Bi	0.035602178578364	Na	0.017602659311489	Rb	0.92461527303085	0.108165455976395	1427.16733087104
Al	0.02	Bi	0.035602178578364	Na	0.017602659311489	Pd	0.92461527303085	0.144620768740041	3067.31169692768
Al	0.02	Bi	0.035602178578364	Na	0.017602659311489	Si	0.92461527303085	0.176566889122838	2261.13904242526
Al	0.02	Bi	0.035602178578364	Na	0.017602659311489	Sm	0.92461527303085	0.183020903535032	2196.27457597104
Al	0.02	Bi	0.035602178578364	Na	0.017602659311489	Sr	0.92461527303085	0.120973593522445	4396.32165156364
Al	0.02	Bi	0.035602178578364	Na	0.017602659311489	Ti	0.92461527303085	0.12547287090628	4058.81139844215
Al	0.02	Bi	0.035602178578364	Na	0.017602659311489	V	0.92461527303085	0.129152261434134	4447.99819716745
Al	0.02	Bi	0.035602178578364	Na	0.017602659311489	W	0.92461527303085	0.232672243354124	5016.95223149444
Al	0.02	Bi	0.035602178578364	Na	0.017602659311489	Y	0.92461527303085	0.123929930576381	3280.43780099154
Al	0.02	Bi	0.035602178578364	Na	0.017602659311489	Yb	0.92461527303085	0.216122167401854	1695.89154903851
Al	0.02	Bi	0.035602178578364	Na	0.017602659311489	Zn	0.92461527303085	0.154928844421899	3651.09189501564
Al	0.02	Bi	0.035602178578364	Na	0.017602659311489	Zr	0.92461527303085	0.126885989639747	3743.75541852166
Al	0.02	Bi	0.035602178578364	Nd	0.017602659311489	Al	0.92461527303085	0.151697228472408	4933.03345406269
Al	0.02	Bi	0.035602178578364	Nd	0.017602659311489	Ba	0.92461527303085	0.159666847475067	1708.34283605303
Al	0.02	Bi	0.035602178578364	Nd	0.017602659311489	Bi	0.92461527303085	0.181626619929619	1865.87082601327
Al	0.02	Bi	0.035602178578364	Nd	0.017602659311489	Ca	0.92461527303085	0.119574398750286	3737.67400083497
Al	0.02	Bi	0.035602178578364	Nd	0.017602659311489	Ce	0.92461527303085	0.167942997413484	2153.12774888194
Al	0.02	Bi	0.035602178578364	Nd	0.017602659311489	Co	0.92461527303085	0.145357468184696	4580.9120647398
Al	0.02	Bi	0.035602178578364	Nd	0.017602659311489	Cs	0.92461527303085	0.155528401851764	2224.73623785124
Al	0.02	Bi	0.035602178578364	Nd	0.017602659311489	Cu	0.92461527303085	0.15271059676547	3515.28154442051
Al	0.02	Bi	0.035602178578364	Nd	0.017602659311489	Eu	0.92461527303085	0.188630129036204	2862.14330593437
Al	0.02	Bi	0.035602178578364	Nd	0.017602659311489	Fe	0.92461527303085	0.141666587379928	4756.97275940125
Al	0.02	Bi	0.035602178578364	Nd	0.017602659311489	Hf	0.92461527303085	0.225743723470837	2996.36581278677
Al	0.02	Bi	0.035602178578364	Nd	0.017602659311489	In	0.92461527303085	0.16481097031898	1333.05556585362
Al	0.02	Bi	0.035602178578364	Nd	0.017602659311489	K	0.92461527303085	0.103615608741508	2060.46422537592
Al	0.02	Bi	0.035602178578364	Nd	0.017602659311489	La	0.92461527303085	0.163802791183235	2500.61596202954
Al	0.02	Bi	0.035602178578364	Nd	0.017602659311489	Li	0.92461527303085	0.110012542423222	5767.00516561692
Al	0.02	Bi	0.035602178578364	Nd	0.017602659311489	Mg	0.92461527303085	0.125349282198705	4471.56910700269
Al	0.02	Bi	0.035602178578364	Nd	0.017602659311489	Mn	0.92461527303085	0.13798895745902	4979.36521581571
Al	0.02	Bi	0.035602178578364	Nd	0.017602659311489	Mo	0.92461527303085	0.134266478392736	5943.06586027837
Al	0.02	Bi	0.035602178578364	Nd	0.017602659311489	Na	0.92461527303085	0.099005042465942	3172.42650744822
Al	0.02	Bi	0.035602178578364	Nd	0.017602659311489	Nd	0.92461527303085	0.176216923427337	2366.2538529458
Al	0.02	Bi	0.035602178578364	Nd	0.017602659311489	Ni	0.92461527303085	0.149036673385503	4812.57087350486
Al	0.02	Bi	0.035602178578364	Nd	0.017602659311489	Rb	0.92461527303085	0.109635401882553	1411.81956083375
Al	0.02	Bi	0.035602178578364	Nd	0.017602659311489	Pd	0.92461527303085	0.146090714646199	3051.96392689039
Al	0.02	Bi	0.035602178578364	Nd	0.017602659311489	Si	0.92461527303085	0.178036835028995	2245.79127238797
Al	0.02	Bi	0.035602178578364	Nd	0.017602659311489	Sm	0.92461527303085	0.18449084944119	2180.92680593375
Al	0.02	Bi	0.035602178578364	Nd	0.017602659311489	Sr	0.92461527303085	0.122443539428603	4380.97388152635
Al	0.02	Bi	0.035602178578364	Nd	0.017602659311489	Ti	0.92461527303085	0.126942816812438	4043.46362840485
Al	0.02	Bi	0.035602178578364	Nd	0.017602659311489	V	0.92461527303085	0.130622207340291	4432.65042713016
Al	0.02	Bi	0.035602178578364	Nd	0.017602659311489	W	0.92461527303085	0.234142189260282	5001.60446145715
Al	0.02	Bi	0.035602178578364	Nd	0.017602659311489	Y	0.92461527303085	0.125399876482539	3265.09003095424
Al	0.02	Bi	0.035602178578364	Nd	0.017602659311489	Yb	0.92461527303085	0.217592113308012	1680.54377900122
Al	0.02	Bi	0.035602178578364	Nd	0.017602659311489	Zn	0.92461527303085	0.156398790328056	3635.74412497834
Al	0.02	Bi	0.035602178578364	Nd	0.017602659311489	Zr	0.92461527303085	0.128355935545905	3728.40764848437
Al	0.02	Bi	0.035602178578364	Ni	0.017602659311489	Al	0.92461527303085	0.151179775759433	4979.60599762413
Al	0.02	Bi	0.035602178578364	Ni	0.017602659311489	Ba	0.92461527303085	0.159149394762092	1754.91537961446
Al	0.02	Bi	0.035602178578364	Ni	0.017602659311489	Bi	0.92461527303085	0.181109167216644	1912.4433695747
Al	0.02	Bi	0.035602178578364	Ni	0.017602659311489	Ca	0.92461527303085	0.119056946037311	3784.24654439641
Al	0.02	Bi	0.035602178578364	Ni	0.017602659311489	Ce	0.92461527303085	0.16742554470051	2199.70029244338
Al	0.02	Bi	0.035602178578364	Ni	0.017602659311489	Co	0.92461527303085	0.144840015471722	4627.48460830124
Al	0.02	Bi	0.035602178578364	Ni	0.017602659311489	Cs	0.92461527303085	0.15501094913879	2271.30878141267
Al	0.02	Bi	0.035602178578364	Ni	0.017602659311489	Cu	0.92461527303085	0.152193144052495	3561.85408798195
Al	0.02	Bi	0.035602178578364	Ni	0.017602659311489	Eu	0.92461527303085	0.18811267632323	2908.71584949581
Al	0.02	Bi	0.035602178578364	Ni	0.017602659311489	Fe	0.92461527303085	0.141149134666953	4803.54530296268
Al	0.02	Bi	0.035602178578364	Ni	0.017602659311489	Hf	0.92461527303085	0.225226270757863	3042.93835634821
Al	0.02	Bi	0.035602178578364	Ni	0.017602659311489	In	0.92461527303085	0.164293517606006	1379.62810941506
Al	0.02	Bi	0.035602178578364	Ni	0.017602659311489	K	0.92461527303085	0.103098156028533	2107.03676893736
Al	0.02	Bi	0.035602178578364	Ni	0.017602659311489	La	0.92461527303085	0.16328533847026	2547.18850559097
Al	0.02	Bi	0.035602178578364	Ni	0.017602659311489	Li	0.92461527303085	0.109495089710248	5813.57770917836
Al	0.02	Bi	0.035602178578364	Ni	0.017602659311489	Mg	0.92461527303085	0.12483182948573	4518.14165056413
Al	0.02	Bi	0.035602178578364	Ni	0.017602659311489	Mn	0.92461527303085	0.137471504746046	5025.93775937714
Al	0.02	Bi	0.035602178578364	Ni	0.017602659311489	Mo	0.92461527303085	0.133749025679762	5989.6384038398
Al	0.02	Bi	0.035602178578364	Ni	0.017602659311489	Na	0.92461527303085	0.098487589752967	3218.99905100966
Al	0.02	Bi	0.035602178578364	Ni	0.017602659311489	Nd	0.92461527303085	0.175699470714363	2412.82639650724
Al	0.02	Bi	0.035602178578364	Ni	0.017602659311489	Ni	0.92461527303085	0.148519220672528	4859.1434170663
Al	0.02	Bi	0.035602178578364	Ni	0.017602659311489	Rb	0.92461527303085	0.109117949169578	1458.39210439518
Al	0.02	Bi	0.035602178578364	Ni	0.017602659311489	Pd	0.92461527303085	0.145573261933225	3098.53647045182
Al	0.02	Bi	0.035602178578364	Ni	0.017602659311489	Si	0.92461527303085	0.177519382316021	2292.36381594941
Al	0.02	Bi	0.035602178578364	Ni	0.017602659311489	Sm	0.92461527303085	0.183973396728215	2227.49934949519
Al	0.02	Bi	0.035602178578364	Ni	0.017602659311489	Sr	0.92461527303085	0.121926086715628	4427.54642508779
Al	0.02	Bi	0.035602178578364	Ni	0.017602659311489	Ti	0.92461527303085	0.126425364099463	4090.03617196629
Al	0.02	Bi	0.035602178578364	Ni	0.017602659311489	V	0.92461527303085	0.130104754627317	4479.2229706916
Al	0.02	Bi	0.035602178578364	Ni	0.017602659311489	W	0.92461527303085	0.233624736547308	5048.17700501859
Al	0.02	Bi	0.035602178578364	Ni	0.017602659311489	Y	0.92461527303085	0.124882423769564	3311.66257451568
Al	0.02	Bi	0.035602178578364	Ni	0.017602659311489	Yb	0.92461527303085	0.217074660595038	1727.11632256265
Al	0.02	Bi	0.035602178578364	Ni	0.017602659311489	Zn	0.92461527303085	0.155881337615082	3682.31666853978
Al	0.02	Bi	0.035602178578364	Ni	0.017602659311489	Zr	0.92461527303085	0.12783848283293	3774.9801920458
Al	0.02	Bi	0.035602178578364	Rb	0.017602659311489	Al	0.92461527303085	0.150429661437362	4914.86310562774
Al	0.02	Bi	0.035602178578364	Rb	0.017602659311489	Ba	0.92461527303085	0.158399280440022	1690.17248761807
Al	0.02	Bi	0.035602178578364	Rb	0.017602659311489	Bi	0.92461527303085	0.180359052894573	1847.70047757831
Al	0.02	Bi	0.035602178578364	Rb	0.017602659311489	Ca	0.92461527303085	0.11830683171524	3719.50365240002
Al	0.02	Bi	0.035602178578364	Rb	0.017602659311489	Ce	0.92461527303085	0.166675430378439	2134.95740044699
Al	0.02	Bi	0.035602178578364	Rb	0.017602659311489	Co	0.92461527303085	0.144089901149651	4562.74171630485
Al	0.02	Bi	0.035602178578364	Rb	0.017602659311489	Cs	0.92461527303085	0.154260834816719	2206.56588941628
Al	0.02	Bi	0.035602178578364	Rb	0.017602659311489	Cu	0.92461527303085	0.151443029730424	3497.11119598556
Al	0.02	Bi	0.035602178578364	Rb	0.017602659311489	Eu	0.92461527303085	0.187362562001159	2843.97295749942
Al	0.02	Bi	0.035602178578364	Rb	0.017602659311489	Fe	0.92461527303085	0.140399020344882	4738.80241096629
Al	0.02	Bi	0.035602178578364	Rb	0.017602659311489	Hf	0.92461527303085	0.224476156435792	2978.19546435182
Al	0.02	Bi	0.035602178578364	Rb	0.017602659311489	In	0.92461527303085	0.163543403283935	1314.88521741867
Al	0.02	Bi	0.035602178578364	Rb	0.017602659311489	K	0.92461527303085	0.102348041706462	2042.29387694097
Al	0.02	Bi	0.035602178578364	Rb	0.017602659311489	La	0.92461527303085	0.162535224148189	2482.44561359458
Al	0.02	Bi	0.035602178578364	Rb	0.017602659311489	Li	0.92461527303085	0.108744975388177	5748.83481718196
Al	0.02	Bi	0.035602178578364	Rb	0.017602659311489	Mg	0.92461527303085	0.124081715163659	4453.39875856774
Al	0.02	Bi	0.035602178578364	Rb	0.017602659311489	Mn	0.92461527303085	0.136721390423975	4961.19486738075
Al	0.02	Bi	0.035602178578364	Rb	0.017602659311489	Mo	0.92461527303085	0.132998911357691	5924.89551184341
Al	0.02	Bi	0.035602178578364	Rb	0.017602659311489	Na	0.92461527303085	0.097737475430896	3154.25615901327
Al	0.02	Bi	0.035602178578364	Rb	0.017602659311489	Nd	0.92461527303085	0.174949356392292	2348.08350451085
Al	0.02	Bi	0.035602178578364	Rb	0.017602659311489	Ni	0.92461527303085	0.147769106350457	4794.40052506991
Al	0.02	Bi	0.035602178578364	Rb	0.017602659311489	Rb	0.92461527303085	0.108367834847508	1393.64921239879
Al	0.02	Bi	0.035602178578364	Rb	0.017602659311489	Pd	0.92461527303085	0.144823147611154	3033.79357845543
Al	0.02	Bi	0.035602178578364	Rb	0.017602659311489	Si	0.92461527303085	0.17676926799395	2227.62092395302
Al	0.02	Bi	0.035602178578364	Rb	0.017602659311489	Sm	0.92461527303085	0.183223282406145	2162.7564574988
Al	0.02	Bi	0.035602178578364	Rb	0.017602659311489	Sr	0.92461527303085	0.121175972393557	4362.8035330914
Al	0.02	Bi	0.035602178578364	Rb	0.017602659311489	Ti	0.92461527303085	0.125675249777392	4025.2932799699
Al	0.02	Bi	0.035602178578364	Rb	0.017602659311489	V	0.92461527303085	0.129354640305246	4414.48007869521
Al	0.02	Bi	0.035602178578364	Rb	0.017602659311489	W	0.92461527303085	0.232874622225237	4983.4341130222
Al	0.02	Bi	0.035602178578364	Rb	0.017602659311489	Y	0.92461527303085	0.124132309447494	3246.91968251929
Al	0.02	Bi	0.035602178578364	Rb	0.017602659311489	Yb	0.92461527303085	0.216324546272967	1662.37343056626
Al	0.02	Bi	0.035602178578364	Rb	0.017602659311489	Zn	0.92461527303085	0.155131223293011	3617.57377654339
Al	0.02	Bi	0.035602178578364	Rb	0.017602659311489	Zr	0.92461527303085	0.127088368510859	3710.23730004942
Al	0.02	Bi	0.035602178578364	Pd	0.017602659311489	Al	0.92461527303085	0.151123691126672	4946.08787915188
Al	0.02	Bi	0.035602178578364	Pd	0.017602659311489	Ba	0.92461527303085	0.159093310129331	1721.39726114222
Al	0.02	Bi	0.035602178578364	Pd	0.017602659311489	Bi	0.92461527303085	0.181053082583883	1878.92525110246
Al	0.02	Bi	0.035602178578364	Pd	0.017602659311489	Ca	0.92461527303085	0.11900086140455	3750.72842592416
Al	0.02	Bi	0.035602178578364	Pd	0.017602659311489	Ce	0.92461527303085	0.167369460067748	2166.18217397114
Al	0.02	Bi	0.035602178578364	Pd	0.017602659311489	Co	0.92461527303085	0.14478393083896	4593.96648982899
Al	0.02	Bi	0.035602178578364	Pd	0.017602659311489	Cs	0.92461527303085	0.154954864506028	2237.79066294043
Al	0.02	Bi	0.035602178578364	Pd	0.017602659311489	Cu	0.92461527303085	0.152137059419734	3528.3359695097
Al	0.02	Bi	0.035602178578364	Pd	0.017602659311489	Eu	0.92461527303085	0.188056591690468	2875.19773102356
Al	0.02	Bi	0.035602178578364	Pd	0.017602659311489	Fe	0.92461527303085	0.141093050034192	4770.02718449044
Al	0.02	Bi	0.035602178578364	Pd	0.017602659311489	Hf	0.92461527303085	0.225170186125101	3009.42023787596
Al	0.02	Bi	0.035602178578364	Pd	0.017602659311489	In	0.92461527303085	0.164237432973244	1346.10999094281
Al	0.02	Bi	0.035602178578364	Pd	0.017602659311489	K	0.92461527303085	0.103042071395771	2073.51865046511
Al	0.02	Bi	0.035602178578364	Pd	0.017602659311489	La	0.92461527303085	0.163229253837499	2513.67038711873
Al	0.02	Bi	0.035602178578364	Pd	0.017602659311489	Li	0.92461527303085	0.109439005077486	5780.05959070611
Al	0.02	Bi	0.035602178578364	Pd	0.017602659311489	Mg	0.92461527303085	0.124775744852969	4484.62353209188
Al	0.02	Bi	0.035602178578364	Pd	0.017602659311489	Mn	0.92461527303085	0.137415420113284	4992.4196409049
Al	0.02	Bi	0.035602178578364	Pd	0.017602659311489	Mo	0.92461527303085	0.133692941047	5956.12028536756
Al	0.02	Bi	0.035602178578364	Pd	0.017602659311489	Na	0.92461527303085	0.098431505120206	3185.48093253741
Al	0.02	Bi	0.035602178578364	Pd	0.017602659311489	Nd	0.92461527303085	0.175643386081601	2379.30827803499
Al	0.02	Bi	0.035602178578364	Pd	0.017602659311489	Ni	0.92461527303085	0.148463136039767	4825.62529859405
Al	0.02	Bi	0.035602178578364	Pd	0.017602659311489	Rb	0.92461527303085	0.109061864536817	1424.87398592294
Al	0.02	Bi	0.035602178578364	Pd	0.017602659311489	Pd	0.92461527303085	0.145517177300463	3065.01835197958
Al	0.02	Bi	0.035602178578364	Pd	0.017602659311489	Si	0.92461527303085	0.177463297683259	2258.84569747716
Al	0.02	Bi	0.035602178578364	Pd	0.017602659311489	Sm	0.92461527303085	0.183917312095454	2193.98123102294
Al	0.02	Bi	0.035602178578364	Pd	0.017602659311489	Sr	0.92461527303085	0.121870002082867	4394.02830661554
Al	0.02	Bi	0.035602178578364	Pd	0.017602659311489	Ti	0.92461527303085	0.126369279466702	4056.51805349405
Al	0.02	Bi	0.035602178578364	Pd	0.017602659311489	V	0.92461527303085	0.130048669994555	4445.70485221935
Al	0.02	Bi	0.035602178578364	Pd	0.017602659311489	W	0.92461527303085	0.233568651914546	5014.65888654634
Al	0.02	Bi	0.035602178578364	Pd	0.017602659311489	Y	0.92461527303085	0.124826339136803	3278.14445604344
Al	0.02	Bi	0.035602178578364	Pd	0.017602659311489	Yb	0.92461527303085	0.217018575962276	1693.59820409041
Al	0.02	Bi	0.035602178578364	Pd	0.017602659311489	Zn	0.92461527303085	0.15582525298232	3648.79855006753
Al	0.02	Bi	0.035602178578364	Pd	0.017602659311489	Zr	0.92461527303085	0.127782398200169	3741.46207357356
Al	0.02	Bi	0.035602178578364	Si	0.017602659311489	Al	0.92461527303085	0.151731875622239	4930.74010911459
Al	0.02	Bi	0.035602178578364	Si	0.017602659311489	Ba	0.92461527303085	0.159701494624898	1706.04949110492
Al	0.02	Bi	0.035602178578364	Si	0.017602659311489	Bi	0.92461527303085	0.18166126707945	1863.57748106517
Al	0.02	Bi	0.035602178578364	Si	0.017602659311489	Ca	0.92461527303085	0.119609045900117	3735.38065588687
Al	0.02	Bi	0.035602178578364	Si	0.017602659311489	Ce	0.92461527303085	0.167977644563315	2150.83440393384
Al	0.02	Bi	0.035602178578364	Si	0.017602659311489	Co	0.92461527303085	0.145392115334527	4578.6187197917
Al	0.02	Bi	0.035602178578364	Si	0.017602659311489	Cs	0.92461527303085	0.155563049001596	2222.44289290314
Al	0.02	Bi	0.035602178578364	Si	0.017602659311489	Cu	0.92461527303085	0.152745243915301	3512.98819947241
Al	0.02	Bi	0.035602178578364	Si	0.017602659311489	Eu	0.92461527303085	0.188664776186035	2859.84996098627
Al	0.02	Bi	0.035602178578364	Si	0.017602659311489	Fe	0.92461527303085	0.141701234529759	4754.67941445315
Al	0.02	Bi	0.035602178578364	Si	0.017602659311489	Hf	0.92461527303085	0.225778370620669	2994.07246783867
Al	0.02	Bi	0.035602178578364	Si	0.017602659311489	In	0.92461527303085	0.164845617468812	1330.76222090552
Al	0.02	Bi	0.035602178578364	Si	0.017602659311489	K	0.92461527303085	0.103650255891339	2058.17088042782
Al	0.02	Bi	0.035602178578364	Si	0.017602659311489	La	0.92461527303085	0.163837438333066	2498.32261708144
Al	0.02	Bi	0.035602178578364	Si	0.017602659311489	Li	0.92461527303085	0.110047189573054	5764.71182066882
Al	0.02	Bi	0.035602178578364	Si	0.017602659311489	Mg	0.92461527303085	0.125383929348536	4469.27576205459
Al	0.02	Bi	0.035602178578364	Si	0.017602659311489	Mn	0.92461527303085	0.138023604608852	4977.07187086761
Al	0.02	Bi	0.035602178578364	Si	0.017602659311489	Mo	0.92461527303085	0.134301125542568	5940.77251533026
Al	0.02	Bi	0.035602178578364	Si	0.017602659311489	Na	0.92461527303085	0.099039689615773	3170.13316250012
Al	0.02	Bi	0.035602178578364	Si	0.017602659311489	Nd	0.92461527303085	0.176251570577168	2363.9605079977
Al	0.02	Bi	0.035602178578364	Si	0.017602659311489	Ni	0.92461527303085	0.149071320535334	4810.27752855676
Al	0.02	Bi	0.035602178578364	Si	0.017602659311489	Rb	0.92461527303085	0.109670049032384	1409.52621588564
Al	0.02	Bi	0.035602178578364	Si	0.017602659311489	Pd	0.92461527303085	0.146125361796031	3049.67058194229
Al	0.02	Bi	0.035602178578364	Si	0.017602659311489	Si	0.92461527303085	0.178071482178827	2243.49792743987
Al	0.02	Bi	0.035602178578364	Si	0.017602659311489	Sm	0.92461527303085	0.184525496591021	2178.63346098565
Al	0.02	Bi	0.035602178578364	Si	0.017602659311489	Sr	0.92461527303085	0.122478186578434	4378.68053657825
Al	0.02	Bi	0.035602178578364	Si	0.017602659311489	Ti	0.92461527303085	0.126977463962269	4041.17028345675
Al	0.02	Bi	0.035602178578364	Si	0.017602659311489	V	0.92461527303085	0.130656854490123	4430.35708218206
Al	0.02	Bi	0.035602178578364	Si	0.017602659311489	W	0.92461527303085	0.234176836410114	4999.31111650905
Al	0.02	Bi	0.035602178578364	Si	0.017602659311489	Y	0.92461527303085	0.12543452363237	3262.79668600614
Al	0.02	Bi	0.035602178578364	Si	0.017602659311489	Yb	0.92461527303085	0.217626760457844	1678.25043405312
Al	0.02	Bi	0.035602178578364	Si	0.017602659311489	Zn	0.92461527303085	0.156433437477888	3633.45078003024
Al	0.02	Bi	0.035602178578364	Si	0.017602659311489	Zr	0.92461527303085	0.128390582695736	3726.11430353627
Al	0.02	Bi	0.035602178578364	Sm	0.017602659311489	Al	0.92461527303085	0.151854745988112	4929.50523106562
Al	0.02	Bi	0.035602178578364	Sm	0.017602659311489	Ba	0.92461527303085	0.159824364990772	1704.81461305595
Al	0.02	Bi	0.035602178578364	Sm	0.017602659311489	Bi	0.92461527303085	0.181784137445323	1862.34260301619
Al	0.02	Bi	0.035602178578364	Sm	0.017602659311489	Ca	0.92461527303085	0.11973191626599	3734.14577783789
Al	0.02	Bi	0.035602178578364	Sm	0.017602659311489	Ce	0.92461527303085	0.168100514929189	2149.59952588487
Al	0.02	Bi	0.035602178578364	Sm	0.017602659311489	Co	0.92461527303085	0.145514985700401	4577.38384174272
Al	0.02	Bi	0.035602178578364	Sm	0.017602659311489	Cs	0.92461527303085	0.155685919367469	2221.20801485416
Al	0.02	Bi	0.035602178578364	Sm	0.017602659311489	Cu	0.92461527303085	0.152868114281174	3511.75332142343
Al	0.02	Bi	0.035602178578364	Sm	0.017602659311489	Eu	0.92461527303085	0.188787646551909	2858.6150829373
Al	0.02	Bi	0.035602178578364	Sm	0.017602659311489	Fe	0.92461527303085	0.141824104895632	4753.44453640417
Al	0.02	Bi	0.035602178578364	Sm	0.017602659311489	Hf	0.92461527303085	0.225901240986542	2992.83758978969
Al	0.02	Bi	0.035602178578364	Sm	0.017602659311489	In	0.92461527303085	0.164968487834685	1329.52734285655
Al	0.02	Bi	0.035602178578364	Sm	0.017602659311489	K	0.92461527303085	0.103773126257212	2056.93600237884
Al	0.02	Bi	0.035602178578364	Sm	0.017602659311489	La	0.92461527303085	0.163960308698939	2497.08773903246
Al	0.02	Bi	0.035602178578364	Sm	0.017602659311489	Li	0.92461527303085	0.110170059938927	5763.47694261984
Al	0.02	Bi	0.035602178578364	Sm	0.017602659311489	Mg	0.92461527303085	0.125506799714409	4468.04088400561
Al	0.02	Bi	0.035602178578364	Sm	0.017602659311489	Mn	0.92461527303085	0.138146474974725	4975.83699281863
Al	0.02	Bi	0.035602178578364	Sm	0.017602659311489	Mo	0.92461527303085	0.134423995908441	5939.53763728129
Al	0.02	Bi	0.035602178578364	Sm	0.017602659311489	Na	0.92461527303085	0.099162559981646	3168.89828445114
Al	0.02	Bi	0.035602178578364	Sm	0.017602659311489	Nd	0.92461527303085	0.176374440943042	2362.72562994872
Al	0.02	Bi	0.035602178578364	Sm	0.017602659311489	Ni	0.92461527303085	0.149194190901207	4809.04265050778
Al	0.02	Bi	0.035602178578364	Sm	0.017602659311489	Rb	0.92461527303085	0.109792919398257	1408.29133783667
Al	0.02	Bi	0.035602178578364	Sm	0.017602659311489	Pd	0.92461527303085	0.146248232161904	3048.43570389331
Al	0.02	Bi	0.035602178578364	Sm	0.017602659311489	Si	0.92461527303085	0.1781943525447	2242.26304939089
Al	0.02	Bi	0.035602178578364	Sm	0.017602659311489	Sm	0.92461527303085	0.184648366956895	2177.39858293667
Al	0.02	Bi	0.035602178578364	Sm	0.017602659311489	Sr	0.92461527303085	0.122601056944307	4377.44565852927
Al	0.02	Bi	0.035602178578364	Sm	0.017602659311489	Ti	0.92461527303085	0.127100334328142	4039.93540540778
Al	0.02	Bi	0.035602178578364	Sm	0.017602659311489	V	0.92461527303085	0.130779724855996	4429.12220413308
Al	0.02	Bi	0.035602178578364	Sm	0.017602659311489	W	0.92461527303085	0.234299706775987	4998.07623846007
Al	0.02	Bi	0.035602178578364	Sm	0.017602659311489	Y	0.92461527303085	0.125557393998244	3261.56180795717
Al	0.02	Bi	0.035602178578364	Sm	0.017602659311489	Yb	0.92461527303085	0.217749630823717	1677.01555600414
Al	0.02	Bi	0.035602178578364	Sm	0.017602659311489	Zn	0.92461527303085	0.156556307843761	3632.21590198127
Al	0.02	Bi	0.035602178578364	Sm	0.017602659311489	Zr	0.92461527303085	0.128513453061609	3724.87942548729
Al	0.02	Bi	0.035602178578364	Sr	0.017602659311489	Al	0.92461527303085	0.150673500456913	4971.38933169695
Al	0.02	Bi	0.035602178578364	Sr	0.017602659311489	Ba	0.92461527303085	0.158643119459573	1746.69871368728
Al	0.02	Bi	0.035602178578364	Sr	0.017602659311489	Bi	0.92461527303085	0.180602891914124	1904.22670364753
Al	0.02	Bi	0.035602178578364	Sr	0.017602659311489	Ca	0.92461527303085	0.118550670734791	3776.02987846923
Al	0.02	Bi	0.035602178578364	Sr	0.017602659311489	Ce	0.92461527303085	0.16691926939799	2191.4836265162
Al	0.02	Bi	0.035602178578364	Sr	0.017602659311489	Co	0.92461527303085	0.144333740169202	4619.26794237406
Al	0.02	Bi	0.035602178578364	Sr	0.017602659311489	Cs	0.92461527303085	0.15450467383627	2263.0921154855
Al	0.02	Bi	0.035602178578364	Sr	0.017602659311489	Cu	0.92461527303085	0.151686868749975	3553.63742205477
Al	0.02	Bi	0.035602178578364	Sr	0.017602659311489	Eu	0.92461527303085	0.18760640102071	2900.49918356863
Al	0.02	Bi	0.035602178578364	Sr	0.017602659311489	Fe	0.92461527303085	0.140642859364433	4795.3286370355
Al	0.02	Bi	0.035602178578364	Sr	0.017602659311489	Hf	0.92461527303085	0.224719995455343	3034.72169042103
Al	0.02	Bi	0.035602178578364	Sr	0.017602659311489	In	0.92461527303085	0.163787242303486	1371.41144348788
Al	0.02	Bi	0.035602178578364	Sr	0.017602659311489	K	0.92461527303085	0.102591880726013	2098.82010301018
Al	0.02	Bi	0.035602178578364	Sr	0.017602659311489	La	0.92461527303085	0.162779063167741	2538.9718396638
Al	0.02	Bi	0.035602178578364	Sr	0.017602659311489	Li	0.92461527303085	0.108988814407728	5805.36104325118
Al	0.02	Bi	0.035602178578364	Sr	0.017602659311489	Mg	0.92461527303085	0.12432555418321	4509.92498463695
Al	0.02	Bi	0.035602178578364	Sr	0.017602659311489	Mn	0.92461527303085	0.136965229443526	5017.72109344996
Al	0.02	Bi	0.035602178578364	Sr	0.017602659311489	Mo	0.92461527303085	0.133242750377242	5981.42173791262
Al	0.02	Bi	0.035602178578364	Sr	0.017602659311489	Na	0.92461527303085	0.097981314450448	3210.78238508248
Al	0.02	Bi	0.035602178578364	Sr	0.017602659311489	Nd	0.92461527303085	0.175193195411843	2404.60973058006
Al	0.02	Bi	0.035602178578364	Sr	0.017602659311489	Ni	0.92461527303085	0.148012945370008	4850.92675113912
Al	0.02	Bi	0.035602178578364	Sr	0.017602659311489	Rb	0.92461527303085	0.108611673867059	1450.175438468
Al	0.02	Bi	0.035602178578364	Sr	0.017602659311489	Pd	0.92461527303085	0.145066986630705	3090.31980452464
Al	0.02	Bi	0.035602178578364	Sr	0.017602659311489	Si	0.92461527303085	0.177013107013501	2284.14715002223
Al	0.02	Bi	0.035602178578364	Sr	0.017602659311489	Sm	0.92461527303085	0.183467121425696	2219.28268356801
Al	0.02	Bi	0.035602178578364	Sr	0.017602659311489	Sr	0.92461527303085	0.121419811413108	4419.32975916061
Al	0.02	Bi	0.035602178578364	Sr	0.017602659311489	Ti	0.92461527303085	0.125919088796943	4081.81950603911
Al	0.02	Bi	0.035602178578364	Sr	0.017602659311489	V	0.92461527303085	0.129598479324797	4471.00630476442
Al	0.02	Bi	0.035602178578364	Sr	0.017602659311489	W	0.92461527303085	0.233118461244788	5039.96033909141
Al	0.02	Bi	0.035602178578364	Sr	0.017602659311489	Y	0.92461527303085	0.124376148467045	3303.4459085885
Al	0.02	Bi	0.035602178578364	Sr	0.017602659311489	Yb	0.92461527303085	0.216568385292518	1718.89965663548
Al	0.02	Bi	0.035602178578364	Sr	0.017602659311489	Zn	0.92461527303085	0.155375062312562	3674.1000026126
Al	0.02	Bi	0.035602178578364	Sr	0.017602659311489	Zr	0.92461527303085	0.12733220753041	3766.76352611863
Al	0.02	Bi	0.035602178578364	Ti	0.017602659311489	Al	0.92461527303085	0.150759156890725	4964.96387218625
Al	0.02	Bi	0.035602178578364	Ti	0.017602659311489	Ba	0.92461527303085	0.158728775893384	1740.27325417659
Al	0.02	Bi	0.035602178578364	Ti	0.017602659311489	Bi	0.92461527303085	0.180688548347936	1897.80124413683
Al	0.02	Bi	0.035602178578364	Ti	0.017602659311489	Ca	0.92461527303085	0.118636327168603	3769.60441895853
Al	0.02	Bi	0.035602178578364	Ti	0.017602659311489	Ce	0.92461527303085	0.167004925831801	2185.0581670055
Al	0.02	Bi	0.035602178578364	Ti	0.017602659311489	Co	0.92461527303085	0.144419396603013	4612.84248286336
Al	0.02	Bi	0.035602178578364	Ti	0.017602659311489	Cs	0.92461527303085	0.154590330270082	2256.6666559748
Al	0.02	Bi	0.035602178578364	Ti	0.017602659311489	Cu	0.92461527303085	0.151772525183787	3547.21196254407
Al	0.02	Bi	0.035602178578364	Ti	0.017602659311489	Eu	0.92461527303085	0.187692057454521	2894.07372405793
Al	0.02	Bi	0.035602178578364	Ti	0.017602659311489	Fe	0.92461527303085	0.140728515798245	4788.90317752481
Al	0.02	Bi	0.035602178578364	Ti	0.017602659311489	Hf	0.92461527303085	0.224805651889154	3028.29623091033
Al	0.02	Bi	0.035602178578364	Ti	0.017602659311489	In	0.92461527303085	0.163872898737298	1364.98598397718
Al	0.02	Bi	0.035602178578364	Ti	0.017602659311489	K	0.92461527303085	0.102677537159825	2092.39464349948
Al	0.02	Bi	0.035602178578364	Ti	0.017602659311489	La	0.92461527303085	0.162864719601552	2532.5463801531
Al	0.02	Bi	0.035602178578364	Ti	0.017602659311489	Li	0.92461527303085	0.10907447084154	5798.93558374048
Al	0.02	Bi	0.035602178578364	Ti	0.017602659311489	Mg	0.92461527303085	0.124411210617022	4503.49952512625
Al	0.02	Bi	0.035602178578364	Ti	0.017602659311489	Mn	0.92461527303085	0.137050885877338	5011.29563393927
Al	0.02	Bi	0.035602178578364	Ti	0.017602659311489	Mo	0.92461527303085	0.133328406811054	5974.99627840193
Al	0.02	Bi	0.035602178578364	Ti	0.017602659311489	Na	0.92461527303085	0.098066970884259	3204.35692557178
Al	0.02	Bi	0.035602178578364	Ti	0.017602659311489	Nd	0.92461527303085	0.175278851845654	2398.18427106936
Al	0.02	Bi	0.035602178578364	Ti	0.017602659311489	Ni	0.92461527303085	0.14809860180382	4844.50129162842
Al	0.02	Bi	0.035602178578364	Ti	0.017602659311489	Rb	0.92461527303085	0.10869733030087	1443.74997895731
Al	0.02	Bi	0.035602178578364	Ti	0.017602659311489	Pd	0.92461527303085	0.145152643064517	3083.89434501395
Al	0.02	Bi	0.035602178578364	Ti	0.017602659311489	Si	0.92461527303085	0.177098763447313	2277.72169051153
Al	0.02	Bi	0.035602178578364	Ti	0.017602659311489	Sm	0.92461527303085	0.183552777859507	2212.85722405731
Al	0.02	Bi	0.035602178578364	Ti	0.017602659311489	Sr	0.92461527303085	0.12150546784692	4412.90429964991
Al	0.02	Bi	0.035602178578364	Ti	0.017602659311489	Ti	0.92461527303085	0.126004745230755	4075.39404652841
Al	0.02	Bi	0.035602178578364	Ti	0.017602659311489	V	0.92461527303085	0.129684135758609	4464.58084525372
Al	0.02	Bi	0.035602178578364	Ti	0.017602659311489	W	0.92461527303085	0.2332041176786	5033.53487958071
Al	0.02	Bi	0.035602178578364	Ti	0.017602659311489	Y	0.92461527303085	0.124461804900856	3297.0204490778
Al	0.02	Bi	0.035602178578364	Ti	0.017602659311489	Yb	0.92461527303085	0.21665404172633	1712.47419712478
Al	0.02	Bi	0.035602178578364	Ti	0.017602659311489	Zn	0.92461527303085	0.155460718746374	3667.6745431019
Al	0.02	Bi	0.035602178578364	Ti	0.017602659311489	Zr	0.92461527303085	0.127417863964222	3760.33806660793
Al	0.02	Bi	0.035602178578364	V	0.017602659311489	Al	0.92461527303085	0.150829204465998	4972.37314048012
Al	0.02	Bi	0.035602178578364	V	0.017602659311489	Ba	0.92461527303085	0.158798823468657	1747.68252247045
Al	0.02	Bi	0.035602178578364	V	0.017602659311489	Bi	0.92461527303085	0.180758595923209	1905.21051243069
Al	0.02	Bi	0.035602178578364	V	0.017602659311489	Ca	0.92461527303085	0.118706374743875	3777.0136872524
Al	0.02	Bi	0.035602178578364	V	0.017602659311489	Ce	0.92461527303085	0.167074973407074	2192.46743529937
Al	0.02	Bi	0.035602178578364	V	0.017602659311489	Co	0.92461527303085	0.144489444178286	4620.25175115722
Al	0.02	Bi	0.035602178578364	V	0.017602659311489	Cs	0.92461527303085	0.154660377845354	2264.07592426866
Al	0.02	Bi	0.035602178578364	V	0.017602659311489	Cu	0.92461527303085	0.151842572759059	3554.62123083794
Al	0.02	Bi	0.035602178578364	V	0.017602659311489	Eu	0.92461527303085	0.187762105029794	2901.4829923518
Al	0.02	Bi	0.035602178578364	V	0.017602659311489	Fe	0.92461527303085	0.140798563373517	4796.31244581867
Al	0.02	Bi	0.035602178578364	V	0.017602659311489	Hf	0.92461527303085	0.224875699464427	3035.7054992042
Al	0.02	Bi	0.035602178578364	V	0.017602659311489	In	0.92461527303085	0.16394294631257	1372.39525227105
Al	0.02	Bi	0.035602178578364	V	0.017602659311489	K	0.92461527303085	0.102747584735097	2099.80391179334
Al	0.02	Bi	0.035602178578364	V	0.017602659311489	La	0.92461527303085	0.162934767176825	2539.95564844696
Al	0.02	Bi	0.035602178578364	V	0.017602659311489	Li	0.92461527303085	0.109144518416812	5806.34485203434
Al	0.02	Bi	0.035602178578364	V	0.017602659311489	Mg	0.92461527303085	0.124481258192294	4510.90879342011
Al	0.02	Bi	0.035602178578364	V	0.017602659311489	Mn	0.92461527303085	0.13712093345261	5018.70490223313
Al	0.02	Bi	0.035602178578364	V	0.017602659311489	Mo	0.92461527303085	0.133398454386326	5982.40554669579
Al	0.02	Bi	0.035602178578364	V	0.017602659311489	Na	0.92461527303085	0.098137018459532	3211.76619386564
Al	0.02	Bi	0.035602178578364	V	0.017602659311489	Nd	0.92461527303085	0.175348899420927	2405.59353936323
Al	0.02	Bi	0.035602178578364	V	0.017602659311489	Ni	0.92461527303085	0.148168649379093	4851.91055992229
Al	0.02	Bi	0.035602178578364	V	0.017602659311489	Rb	0.92461527303085	0.108767377876143	1451.15924725117
Al	0.02	Bi	0.035602178578364	V	0.017602659311489	Pd	0.92461527303085	0.145222690639789	3091.30361330781
Al	0.02	Bi	0.035602178578364	V	0.017602659311489	Si	0.92461527303085	0.177168811022585	2285.13095880539
Al	0.02	Bi	0.035602178578364	V	0.017602659311489	Sm	0.92461527303085	0.18362282543478	2220.26649235118
Al	0.02	Bi	0.035602178578364	V	0.017602659311489	Sr	0.92461527303085	0.121575515422192	4420.31356794378
Al	0.02	Bi	0.035602178578364	V	0.017602659311489	Ti	0.92461527303085	0.126074792806028	4082.80331482228
Al	0.02	Bi	0.035602178578364	V	0.017602659311489	V	0.92461527303085	0.129754183333881	4471.99011354758
Al	0.02	Bi	0.035602178578364	V	0.017602659311489	W	0.92461527303085	0.233274165253872	5040.94414787458
Al	0.02	Bi	0.035602178578364	V	0.017602659311489	Y	0.92461527303085	0.124531852476129	3304.42971737167
Al	0.02	Bi	0.035602178578364	V	0.017602659311489	Yb	0.92461527303085	0.216724089301602	1719.88346541864
Al	0.02	Bi	0.035602178578364	V	0.017602659311489	Zn	0.92461527303085	0.155530766321646	3675.08381139577
Al	0.02	Bi	0.035602178578364	V	0.017602659311489	Zr	0.92461527303085	0.127487911539494	3767.74733490179
Al	0.02	Bi	0.035602178578364	W	0.017602659311489	Al	0.92461527303085	0.152799999267706	4983.20478508115
Al	0.02	Bi	0.035602178578364	W	0.017602659311489	Ba	0.92461527303085	0.160769618270365	1758.51416707148
Al	0.02	Bi	0.035602178578364	W	0.017602659311489	Bi	0.92461527303085	0.182729390724917	1916.04215703172
Al	0.02	Bi	0.035602178578364	W	0.017602659311489	Ca	0.92461527303085	0.120677169545584	3787.84533185343
Al	0.02	Bi	0.035602178578364	W	0.017602659311489	Ce	0.92461527303085	0.169045768208782	2203.2990799004
Al	0.02	Bi	0.035602178578364	W	0.017602659311489	Co	0.92461527303085	0.146460238979994	4631.08339575826
Al	0.02	Bi	0.035602178578364	W	0.017602659311489	Cs	0.92461527303085	0.156631172647062	2274.90756886969
Al	0.02	Bi	0.035602178578364	W	0.017602659311489	Cu	0.92461527303085	0.153813367560768	3565.45287543897
Al	0.02	Bi	0.035602178578364	W	0.017602659311489	Eu	0.92461527303085	0.189732899831502	2912.31463695283
Al	0.02	Bi	0.035602178578364	W	0.017602659311489	Fe	0.92461527303085	0.142769358175225	4807.1440904197
Al	0.02	Bi	0.035602178578364	W	0.017602659311489	Hf	0.92461527303085	0.226846494266135	3046.53714380523
Al	0.02	Bi	0.035602178578364	W	0.017602659311489	In	0.92461527303085	0.165913741114278	1383.22689687208
Al	0.02	Bi	0.035602178578364	W	0.017602659311489	K	0.92461527303085	0.104718379536805	2110.63555639438
Al	0.02	Bi	0.035602178578364	W	0.017602659311489	La	0.92461527303085	0.164905561978533	2550.78729304799
Al	0.02	Bi	0.035602178578364	W	0.017602659311489	Li	0.92461527303085	0.11111531321852	5817.17649663537
Al	0.02	Bi	0.035602178578364	W	0.017602659311489	Mg	0.92461527303085	0.126452052994002	4521.74043802115
Al	0.02	Bi	0.035602178578364	W	0.017602659311489	Mn	0.92461527303085	0.139091728254318	5029.53654683416
Al	0.02	Bi	0.035602178578364	W	0.017602659311489	Mo	0.92461527303085	0.135369249188034	5993.23719129682
Al	0.02	Bi	0.035602178578364	W	0.017602659311489	Na	0.92461527303085	0.10010781326124	3222.59783846668
Al	0.02	Bi	0.035602178578364	W	0.017602659311489	Nd	0.92461527303085	0.177319694222635	2416.42518396426
Al	0.02	Bi	0.035602178578364	W	0.017602659311489	Ni	0.92461527303085	0.150139444180801	4862.74220452332
Al	0.02	Bi	0.035602178578364	W	0.017602659311489	Rb	0.92461527303085	0.110738172677851	1461.9908918522
Al	0.02	Bi	0.035602178578364	W	0.017602659311489	Pd	0.92461527303085	0.147193485441497	3102.13525790884
Al	0.02	Bi	0.035602178578364	W	0.017602659311489	Si	0.92461527303085	0.179139605824293	2295.96260340643
Al	0.02	Bi	0.035602178578364	W	0.017602659311489	Sm	0.92461527303085	0.185593620236488	2231.09813695221
Al	0.02	Bi	0.035602178578364	W	0.017602659311489	Sr	0.92461527303085	0.123546310223901	4431.14521254481
Al	0.02	Bi	0.035602178578364	W	0.017602659311489	Ti	0.92461527303085	0.128045587607736	4093.63495942331
Al	0.02	Bi	0.035602178578364	W	0.017602659311489	V	0.92461527303085	0.131724978135589	4482.82175814862
Al	0.02	Bi	0.035602178578364	W	0.017602659311489	W	0.92461527303085	0.23524496005558	5051.77579247561
Al	0.02	Bi	0.035602178578364	W	0.017602659311489	Y	0.92461527303085	0.126502647277837	3315.2613619727
Al	0.02	Bi	0.035602178578364	W	0.017602659311489	Yb	0.92461527303085	0.21869488410331	1730.71511001967
Al	0.02	Bi	0.035602178578364	W	0.017602659311489	Zn	0.92461527303085	0.157501561123354	3685.9154559968
Al	0.02	Bi	0.035602178578364	W	0.017602659311489	Zr	0.92461527303085	0.129458706341203	3778.57897950282
Al	0.02	Bi	0.035602178578364	Y	0.017602659311489	Al	0.92461527303085	0.150729782670163	4950.14533559853
Al	0.02	Bi	0.035602178578364	Y	0.017602659311489	Ba	0.92461527303085	0.158699401672822	1725.45471758886
Al	0.02	Bi	0.035602178578364	Y	0.017602659311489	Bi	0.92461527303085	0.180659174127374	1882.9827075491
Al	0.02	Bi	0.035602178578364	Y	0.017602659311489	Ca	0.92461527303085	0.118606952948041	3754.7858823708
Al	0.02	Bi	0.035602178578364	Y	0.017602659311489	Ce	0.92461527303085	0.166975551611239	2170.23963041778
Al	0.02	Bi	0.035602178578364	Y	0.017602659311489	Co	0.92461527303085	0.144390022382451	4598.02394627563
Al	0.02	Bi	0.035602178578364	Y	0.017602659311489	Cs	0.92461527303085	0.154560956049519	2241.84811938707
Al	0.02	Bi	0.035602178578364	Y	0.017602659311489	Cu	0.92461527303085	0.151743150963225	3532.39342595634
Al	0.02	Bi	0.035602178578364	Y	0.017602659311489	Eu	0.92461527303085	0.187662683233959	2879.2551874702
Al	0.02	Bi	0.035602178578364	Y	0.017602659311489	Fe	0.92461527303085	0.140699141577683	4774.08464093708
Al	0.02	Bi	0.035602178578364	Y	0.017602659311489	Hf	0.92461527303085	0.224776277668592	3013.4776943226
Al	0.02	Bi	0.035602178578364	Y	0.017602659311489	In	0.92461527303085	0.163843524516736	1350.16744738945
Al	0.02	Bi	0.035602178578364	Y	0.017602659311489	K	0.92461527303085	0.102648162939263	2077.57610691175
Al	0.02	Bi	0.035602178578364	Y	0.017602659311489	La	0.92461527303085	0.16283534538099	2517.72784356537
Al	0.02	Bi	0.035602178578364	Y	0.017602659311489	Li	0.92461527303085	0.109045096620978	5784.11704715275
Al	0.02	Bi	0.035602178578364	Y	0.017602659311489	Mg	0.92461527303085	0.12438183639646	4488.68098853852
Al	0.02	Bi	0.035602178578364	Y	0.017602659311489	Mn	0.92461527303085	0.137021511656776	4996.47709735154
Al	0.02	Bi	0.035602178578364	Y	0.017602659311489	Mo	0.92461527303085	0.133299032590492	5960.1777418142
Al	0.02	Bi	0.035602178578364	Y	0.017602659311489	Na	0.92461527303085	0.098037596663697	3189.53838898405
Al	0.02	Bi	0.035602178578364	Y	0.017602659311489	Nd	0.92461527303085	0.175249477625092	2383.36573448163
Al	0.02	Bi	0.035602178578364	Y	0.017602659311489	Ni	0.92461527303085	0.148069227583258	4829.68275504069
Al	0.02	Bi	0.035602178578364	Y	0.017602659311489	Rb	0.92461527303085	0.108667956080308	1428.93144236958
Al	0.02	Bi	0.035602178578364	Y	0.017602659311489	Pd	0.92461527303085	0.145123268843954	3069.07580842622
Al	0.02	Bi	0.035602178578364	Y	0.017602659311489	Si	0.92461527303085	0.17706938922675	2262.9031539238
Al	0.02	Bi	0.035602178578364	Y	0.017602659311489	Sm	0.92461527303085	0.183523403638945	2198.03868746958
Al	0.02	Bi	0.035602178578364	Y	0.017602659311489	Sr	0.92461527303085	0.121476093626358	4398.08576306218
Al	0.02	Bi	0.035602178578364	Y	0.017602659311489	Ti	0.92461527303085	0.125975371010193	4060.57550994068
Al	0.02	Bi	0.035602178578364	Y	0.017602659311489	V	0.92461527303085	0.129654761538047	4449.76230866599
Al	0.02	Bi	0.035602178578364	Y	0.017602659311489	W	0.92461527303085	0.233174743458037	5018.71634299298
Al	0.02	Bi	0.035602178578364	Y	0.017602659311489	Y	0.92461527303085	0.124432430680294	3282.20191249008
Al	0.02	Bi	0.035602178578364	Y	0.017602659311489	Yb	0.92461527303085	0.216624667505767	1697.65566053705
Al	0.02	Bi	0.035602178578364	Y	0.017602659311489	Zn	0.92461527303085	0.155431344525812	3652.85600651417
Al	0.02	Bi	0.035602178578364	Y	0.017602659311489	Zr	0.92461527303085	0.12738848974366	3745.5195300202
Al	0.02	Bi	0.035602178578364	Yb	0.017602659311489	Al	0.92461527303085	0.152484921897621	4919.9790289735
Al	0.02	Bi	0.035602178578364	Yb	0.017602659311489	Ba	0.92461527303085	0.16045454090028	1695.28841096384
Al	0.02	Bi	0.035602178578364	Yb	0.017602659311489	Bi	0.92461527303085	0.182414313354832	1852.81640092408
Al	0.02	Bi	0.035602178578364	Yb	0.017602659311489	Ca	0.92461527303085	0.120362092175498	3724.61957574578
Al	0.02	Bi	0.035602178578364	Yb	0.017602659311489	Ce	0.92461527303085	0.168730690838697	2140.07332379275
Al	0.02	Bi	0.035602178578364	Yb	0.017602659311489	Co	0.92461527303085	0.146145161609909	4567.85763965061
Al	0.02	Bi	0.035602178578364	Yb	0.017602659311489	Cs	0.92461527303085	0.156316095276977	2211.68181276205
Al	0.02	Bi	0.035602178578364	Yb	0.017602659311489	Cu	0.92461527303085	0.153498290190682	3502.22711933132
Al	0.02	Bi	0.035602178578364	Yb	0.017602659311489	Eu	0.92461527303085	0.189417822461417	2849.08888084518
Al	0.02	Bi	0.035602178578364	Yb	0.017602659311489	Fe	0.92461527303085	0.14245428080514	4743.91833431206
Al	0.02	Bi	0.035602178578364	Yb	0.017602659311489	Hf	0.92461527303085	0.22653141689605	2983.31138769758
Al	0.02	Bi	0.035602178578364	Yb	0.017602659311489	In	0.92461527303085	0.165598663744193	1320.00114076443
Al	0.02	Bi	0.035602178578364	Yb	0.017602659311489	K	0.92461527303085	0.10440330216672	2047.40980028673
Al	0.02	Bi	0.035602178578364	Yb	0.017602659311489	La	0.92461527303085	0.164590484608448	2487.56153694035
Al	0.02	Bi	0.035602178578364	Yb	0.017602659311489	Li	0.92461527303085	0.110800235848435	5753.95074052773
Al	0.02	Bi	0.035602178578364	Yb	0.017602659311489	Mg	0.92461527303085	0.126136975623917	4458.5146819135
Al	0.02	Bi	0.035602178578364	Yb	0.017602659311489	Mn	0.92461527303085	0.138776650884233	4966.31079072652
Al	0.02	Bi	0.035602178578364	Yb	0.017602659311489	Mo	0.92461527303085	0.135054171817949	5930.01143518918
Al	0.02	Bi	0.035602178578364	Yb	0.017602659311489	Na	0.92461527303085	0.099792735891155	3159.37208235903
Al	0.02	Bi	0.035602178578364	Yb	0.017602659311489	Nd	0.92461527303085	0.17700461685255	2353.19942785661
Al	0.02	Bi	0.035602178578364	Yb	0.017602659311489	Ni	0.92461527303085	0.149824366810716	4799.51644841567
Al	0.02	Bi	0.035602178578364	Yb	0.017602659311489	Rb	0.92461527303085	0.110423095307766	1398.76513574456
Al	0.02	Bi	0.035602178578364	Yb	0.017602659311489	Pd	0.92461527303085	0.146878408071412	3038.9095018012
Al	0.02	Bi	0.035602178578364	Yb	0.017602659311489	Si	0.92461527303085	0.178824528454208	2232.73684729878
Al	0.02	Bi	0.035602178578364	Yb	0.017602659311489	Sm	0.92461527303085	0.185278542866403	2167.87238084456
Al	0.02	Bi	0.035602178578364	Yb	0.017602659311489	Sr	0.92461527303085	0.123231232853815	4367.91945643716
Al	0.02	Bi	0.035602178578364	Yb	0.017602659311489	Ti	0.92461527303085	0.127730510237651	4030.40920331566
Al	0.02	Bi	0.035602178578364	Yb	0.017602659311489	V	0.92461527303085	0.131409900765504	4419.59600204097
Al	0.02	Bi	0.035602178578364	Yb	0.017602659311489	W	0.92461527303085	0.234929882685495	4988.55003636796
Al	0.02	Bi	0.035602178578364	Yb	0.017602659311489	Y	0.92461527303085	0.126187569907752	3252.03560586505
Al	0.02	Bi	0.035602178578364	Yb	0.017602659311489	Yb	0.92461527303085	0.218379806733225	1667.48935391203
Al	0.02	Bi	0.035602178578364	Yb	0.017602659311489	Zn	0.92461527303085	0.157186483753269	3622.68969988915
Al	0.02	Bi	0.035602178578364	Yb	0.017602659311489	Zr	0.92461527303085	0.129143628971117	3715.35322339518
Al	0.02	Bi	0.035602178578364	Zn	0.017602659311489	Al	0.92461527303085	0.151319934417992	4957.20178159268
Al	0.02	Bi	0.035602178578364	Zn	0.017602659311489	Ba	0.92461527303085	0.159289553420651	1732.51116358301
Al	0.02	Bi	0.035602178578364	Zn	0.017602659311489	Bi	0.92461527303085	0.181249325875203	1890.03915354326
Al	0.02	Bi	0.035602178578364	Zn	0.017602659311489	Ca	0.92461527303085	0.11919710469587	3761.84232836496
Al	0.02	Bi	0.035602178578364	Zn	0.017602659311489	Ce	0.92461527303085	0.167565703359068	2177.29607641193
Al	0.02	Bi	0.035602178578364	Zn	0.017602659311489	Co	0.92461527303085	0.14498017413028	4605.08039226979
Al	0.02	Bi	0.035602178578364	Zn	0.017602659311489	Cs	0.92461527303085	0.155151107797349	2248.90456538123
Al	0.02	Bi	0.035602178578364	Zn	0.017602659311489	Cu	0.92461527303085	0.152333302711054	3539.4498719505
Al	0.02	Bi	0.035602178578364	Zn	0.017602659311489	Eu	0.92461527303085	0.188252834981789	2886.31163346436
Al	0.02	Bi	0.035602178578364	Zn	0.017602659311489	Fe	0.92461527303085	0.141289293325512	4781.14108693123
Al	0.02	Bi	0.035602178578364	Zn	0.017602659311489	Hf	0.92461527303085	0.225366429416422	3020.53414031676
Al	0.02	Bi	0.035602178578364	Zn	0.017602659311489	In	0.92461527303085	0.164433676264565	1357.22389338361
Al	0.02	Bi	0.035602178578364	Zn	0.017602659311489	K	0.92461527303085	0.103238314687092	2084.63255290591
Al	0.02	Bi	0.035602178578364	Zn	0.017602659311489	La	0.92461527303085	0.163425497128819	2524.78428955953
Al	0.02	Bi	0.035602178578364	Zn	0.017602659311489	Li	0.92461527303085	0.109635248368807	5791.17349314691
Al	0.02	Bi	0.035602178578364	Zn	0.017602659311489	Mg	0.92461527303085	0.124971988144289	4495.73743453268
Al	0.02	Bi	0.035602178578364	Zn	0.017602659311489	Mn	0.92461527303085	0.137611663404605	5003.53354334569
Al	0.02	Bi	0.035602178578364	Zn	0.017602659311489	Mo	0.92461527303085	0.133889184338321	5967.23418780835
Al	0.02	Bi	0.035602178578364	Zn	0.017602659311489	Na	0.92461527303085	0.098627748411526	3196.59483497821
Al	0.02	Bi	0.035602178578364	Zn	0.017602659311489	Nd	0.92461527303085	0.175839629372921	2390.42218047579
Al	0.02	Bi	0.035602178578364	Zn	0.017602659311489	Ni	0.92461527303085	0.148659379331087	4836.73920103485
Al	0.02	Bi	0.035602178578364	Zn	0.017602659311489	Rb	0.92461527303085	0.109258107828137	1435.98788836373
Al	0.02	Bi	0.035602178578364	Zn	0.017602659311489	Pd	0.92461527303085	0.145713420591784	3076.13225442037
Al	0.02	Bi	0.035602178578364	Zn	0.017602659311489	Si	0.92461527303085	0.17765954097458	2269.95959991796
Al	0.02	Bi	0.035602178578364	Zn	0.017602659311489	Sm	0.92461527303085	0.184113555386774	2205.09513346374
Al	0.02	Bi	0.035602178578364	Zn	0.017602659311489	Sr	0.92461527303085	0.122066245374187	4405.14220905634
Al	0.02	Bi	0.035602178578364	Zn	0.017602659311489	Ti	0.92461527303085	0.126565522758022	4067.63195593484
Al	0.02	Bi	0.035602178578364	Zn	0.017602659311489	V	0.92461527303085	0.130244913285876	4456.81875466015
Al	0.02	Bi	0.035602178578364	Zn	0.017602659311489	W	0.92461527303085	0.233764895205867	5025.77278898714
Al	0.02	Bi	0.035602178578364	Zn	0.017602659311489	Y	0.92461527303085	0.125022582428123	3289.25835848423
Al	0.02	Bi	0.035602178578364	Zn	0.017602659311489	Yb	0.92461527303085	0.217214819253597	1704.71210653121
Al	0.02	Bi	0.035602178578364	Zn	0.017602659311489	Zn	0.92461527303085	0.156021496273641	3659.91245250833
Al	0.02	Bi	0.035602178578364	Zn	0.017602659311489	Zr	0.92461527303085	0.127978641491489	3752.57597601436
Al	0.02	Bi	0.035602178578364	Zr	0.017602659311489	Al	0.92461527303085	0.150786059591078	4958.96589309122
Al	0.02	Bi	0.035602178578364	Zr	0.017602659311489	Ba	0.92461527303085	0.158755678593737	1734.27527508155
Al	0.02	Bi	0.035602178578364	Zr	0.017602659311489	Bi	0.92461527303085	0.180715451048289	1891.80326504179
Al	0.02	Bi	0.035602178578364	Zr	0.017602659311489	Ca	0.92461527303085	0.118663229868956	3763.6064398635
Al	0.02	Bi	0.035602178578364	Zr	0.017602659311489	Ce	0.92461527303085	0.167031828532154	2179.06018791047
Al	0.02	Bi	0.035602178578364	Zr	0.017602659311489	Co	0.92461527303085	0.144446299303366	4606.84450376833
Al	0.02	Bi	0.035602178578364	Zr	0.017602659311489	Cs	0.92461527303085	0.154617232970434	2250.66867687977
Al	0.02	Bi	0.035602178578364	Zr	0.017602659311489	Cu	0.92461527303085	0.15179942788414	3541.21398344904
Al	0.02	Bi	0.035602178578364	Zr	0.017602659311489	Eu	0.92461527303085	0.187718960154874	2888.0757449629
Al	0.02	Bi	0.035602178578364	Zr	0.017602659311489	Fe	0.92461527303085	0.140755418498598	4782.90519842977
Al	0.02	Bi	0.035602178578364	Zr	0.017602659311489	Hf	0.92461527303085	0.224832554589507	3022.2982518153
Al	0.02	Bi	0.035602178578364	Zr	0.017602659311489	In	0.92461527303085	0.16389980143765	1358.98800488215
Al	0.02	Bi	0.035602178578364	Zr	0.017602659311489	K	0.92461527303085	0.102704439860178	2086.39666440445
Al	0.02	Bi	0.035602178578364	Zr	0.017602659311489	La	0.92461527303085	0.162891622301905	2526.54840105807
Al	0.02	Bi	0.035602178578364	Zr	0.017602659311489	Li	0.92461527303085	0.109101373541892	5792.93760464544
Al	0.02	Bi	0.035602178578364	Zr	0.017602659311489	Mg	0.92461527303085	0.124438113317375	4497.50154603122
Al	0.02	Bi	0.035602178578364	Zr	0.017602659311489	Mn	0.92461527303085	0.13707778857769	5005.29765484423
Al	0.02	Bi	0.035602178578364	Zr	0.017602659311489	Mo	0.92461527303085	0.133355309511406	5968.99829930689
Al	0.02	Bi	0.035602178578364	Zr	0.017602659311489	Na	0.92461527303085	0.098093873584612	3198.35894647675
[truncated: 178,049 more rows]
